# Supplementary material for: Total synthesis of the taraxacine A natural product via Ag(i)-catalysed imidate-alkyne cyclization
Source: Royal Society of Chemistry journal article supplement (doi:10.1039/d4ob01876a), 2024-12-16
Supplement: d4ob01876a1.pdf [file d4ob01876a1.pdf]

## Supporting Information

### Total synthesis of Taraxacine A natural product via Ag(I)-catalysed imidate-alkyne cyclization

Rajesh R. Zalte,<sup>a</sup> Alexey A. Festa,<sup>\*a</sup> Sergei A. Demidov,<sup>a</sup> Samuel O. Awuku,<sup>a</sup> Alexandra S. Golubenkova,<sup>a</sup> Yuri Yu. Mironov,<sup>a</sup> Nikita E. Golantsov,<sup>a</sup> Olga A. Storozhenko,<sup>a</sup> Anton P. Novikov<sup>b</sup> and Leonid G. Voskressensky<sup>a</sup>

- a. Organic Chemistry Department, Science Faculty, Patrice Lumumba Peoples' Friendship University of Russia (RUDN University), 117198 Moscow, Russia, Miklukho-Maklaya st., 6, e-mail: festa-aa@rudn.ru.
- b. Frumkin Institute of Physical Chemistry and Electrochemistry, Russian Academy of Sciences, 119071 Moscow, Russia, Leninsky prosp., 31 Bldg. 4

## Table of Content

|                                                     |    |
|-----------------------------------------------------|----|
| 1. NMR Spectra.....                                 | 3  |
| 2. X-Ray crystallographic data for compound 4h..... | 57 |

# 1. NMR Spectra

3-iodo-1H-indole-2-carbonitrile (**2**) <sup>1</sup>H NMR (700 MHz, DMSO-d<sub>6</sub>)

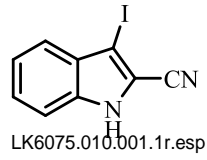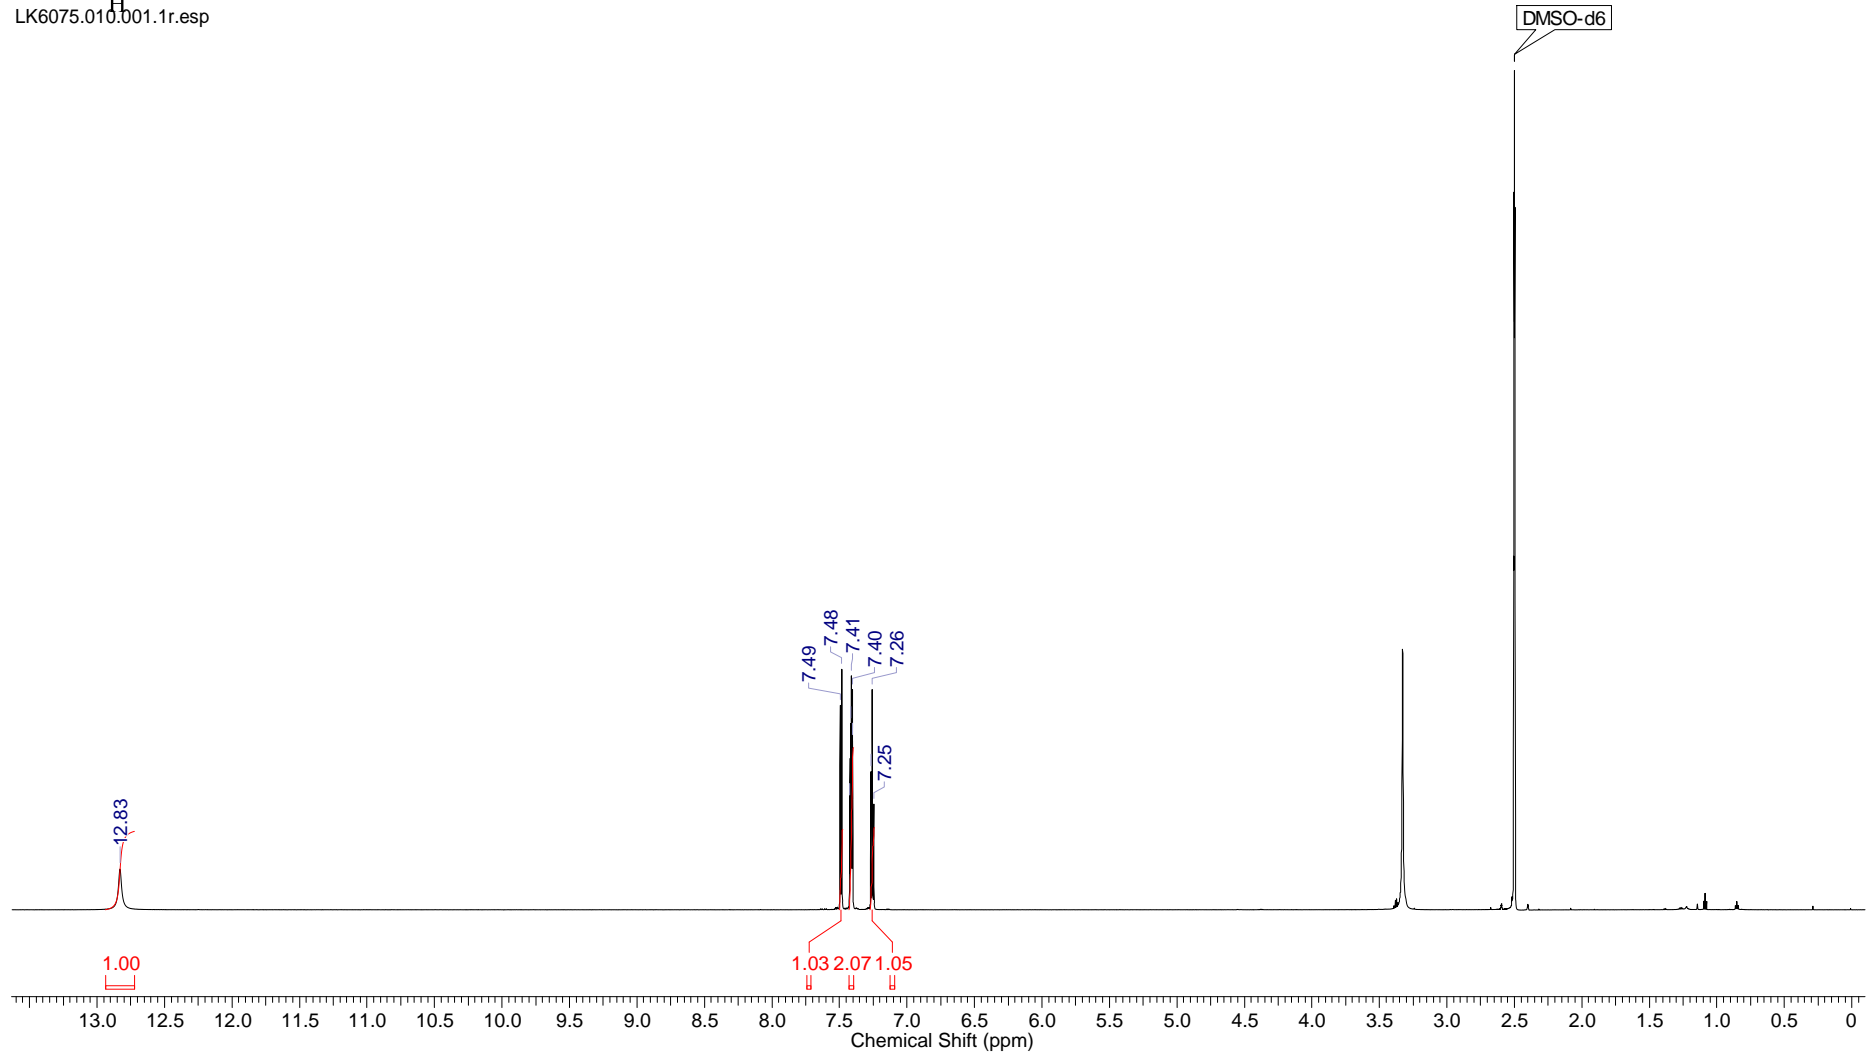

3-iodo-1H-indole-2-carbonitrile (2)  $^{13}\text{C}$  {1H} NMR (177 MHz, DMSO- $d_6$ )

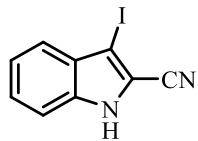

LK6075.011.001.1r.esp

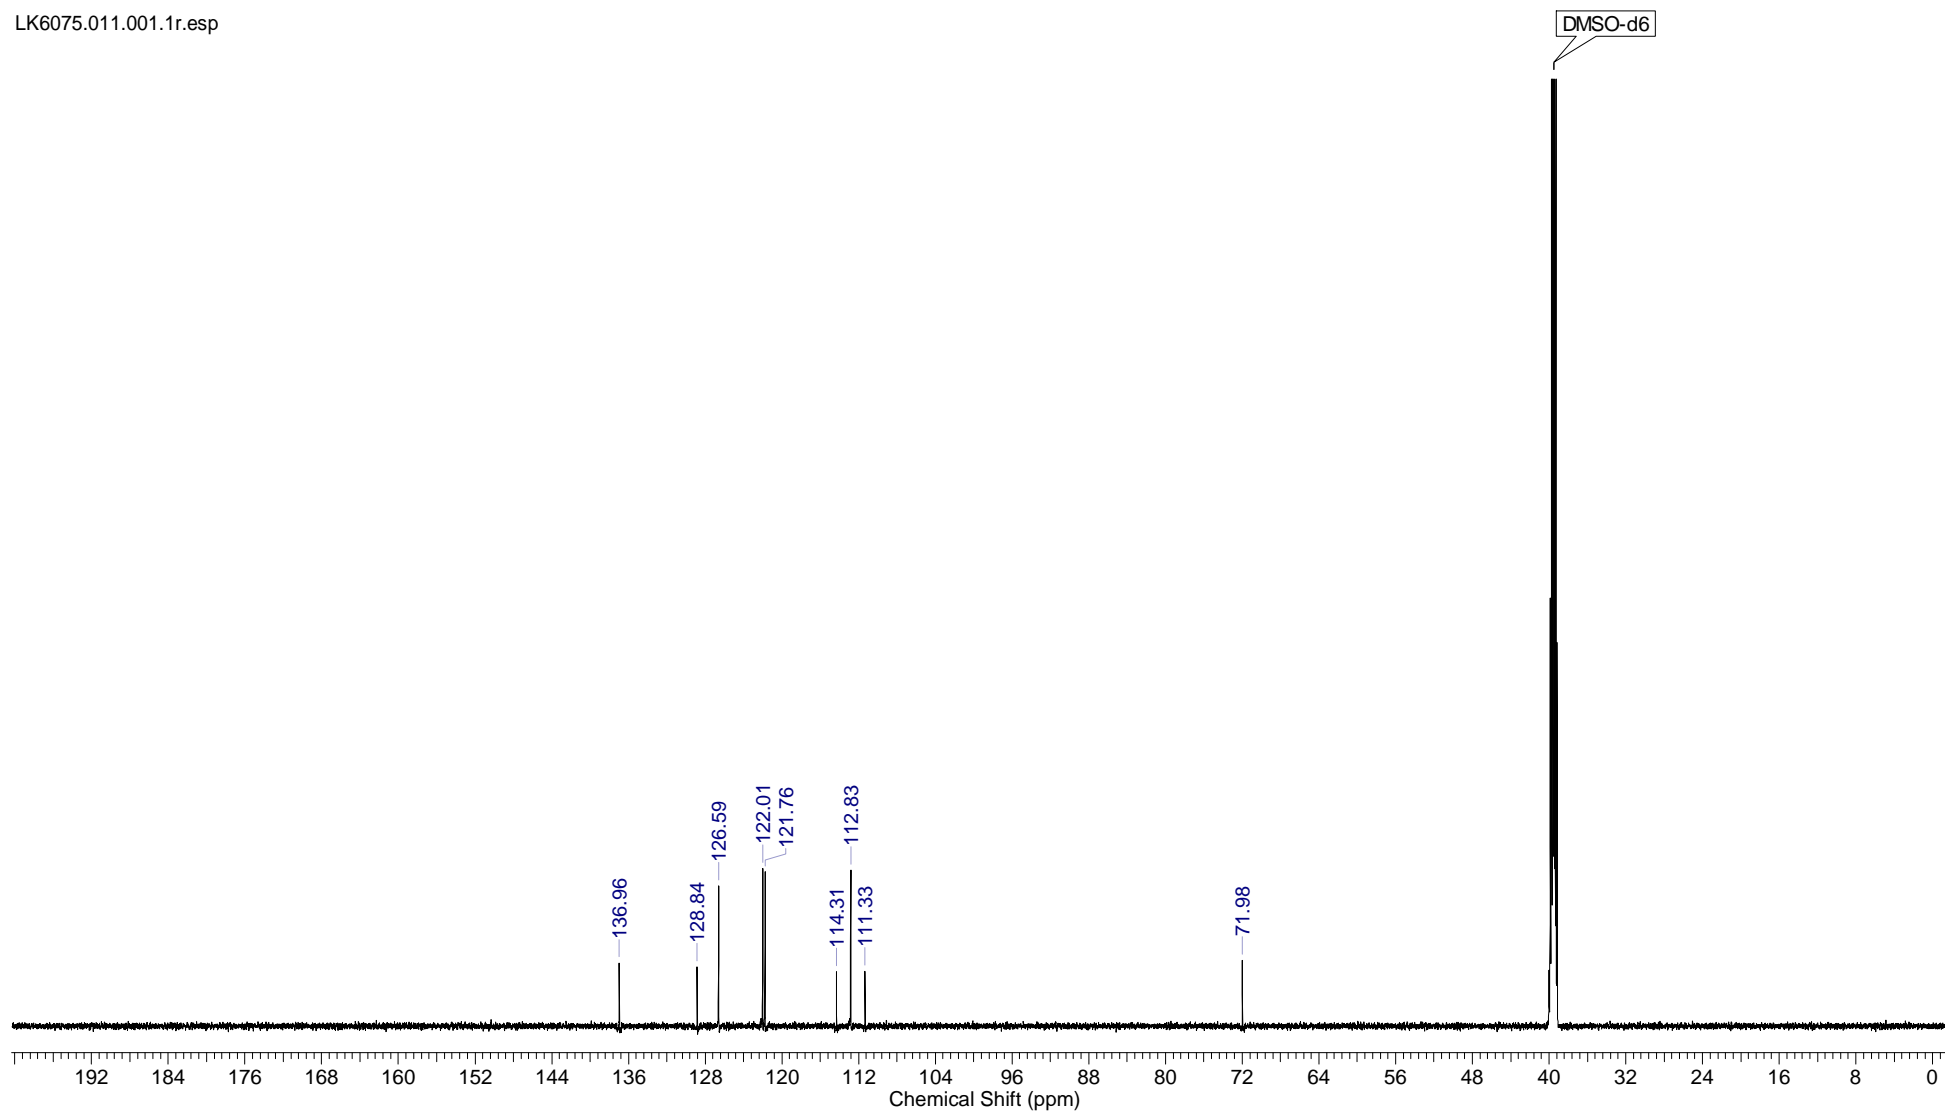

3-((trimethylsilyl)ethynyl)-1H-indole-2-carbonitrile (**3a**) <sup>1</sup>H NMR (700 MHz, DMSO-d<sub>6</sub>)

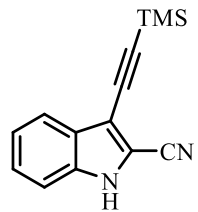

LK6076.010.001.1r.esp

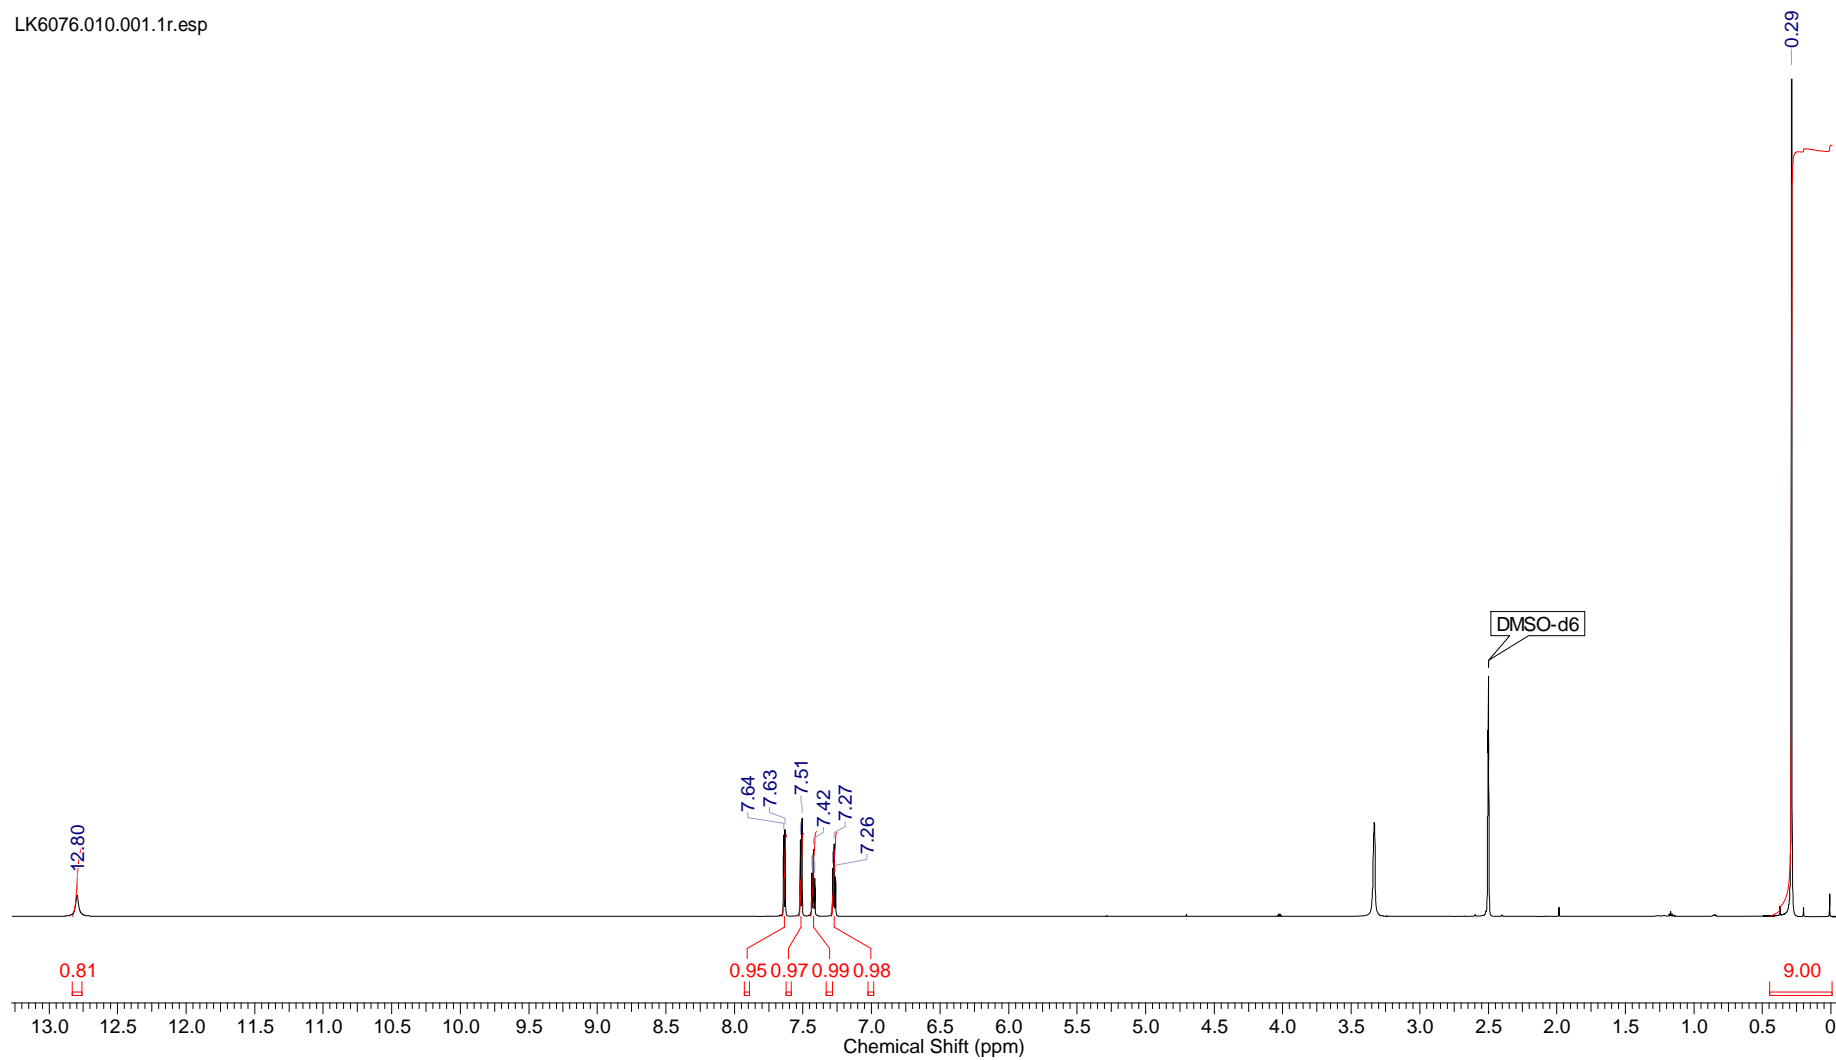

3-((trimethylsilyl)ethynyl)-1H-indole-2-carbonitrile (**3a**)  $^{13}\text{C}$  {1H} NMR (177 MHz, DMSO- $d_6$ )

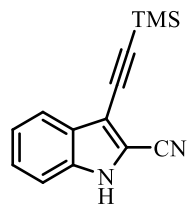

LK6076.011.001.1r.esp

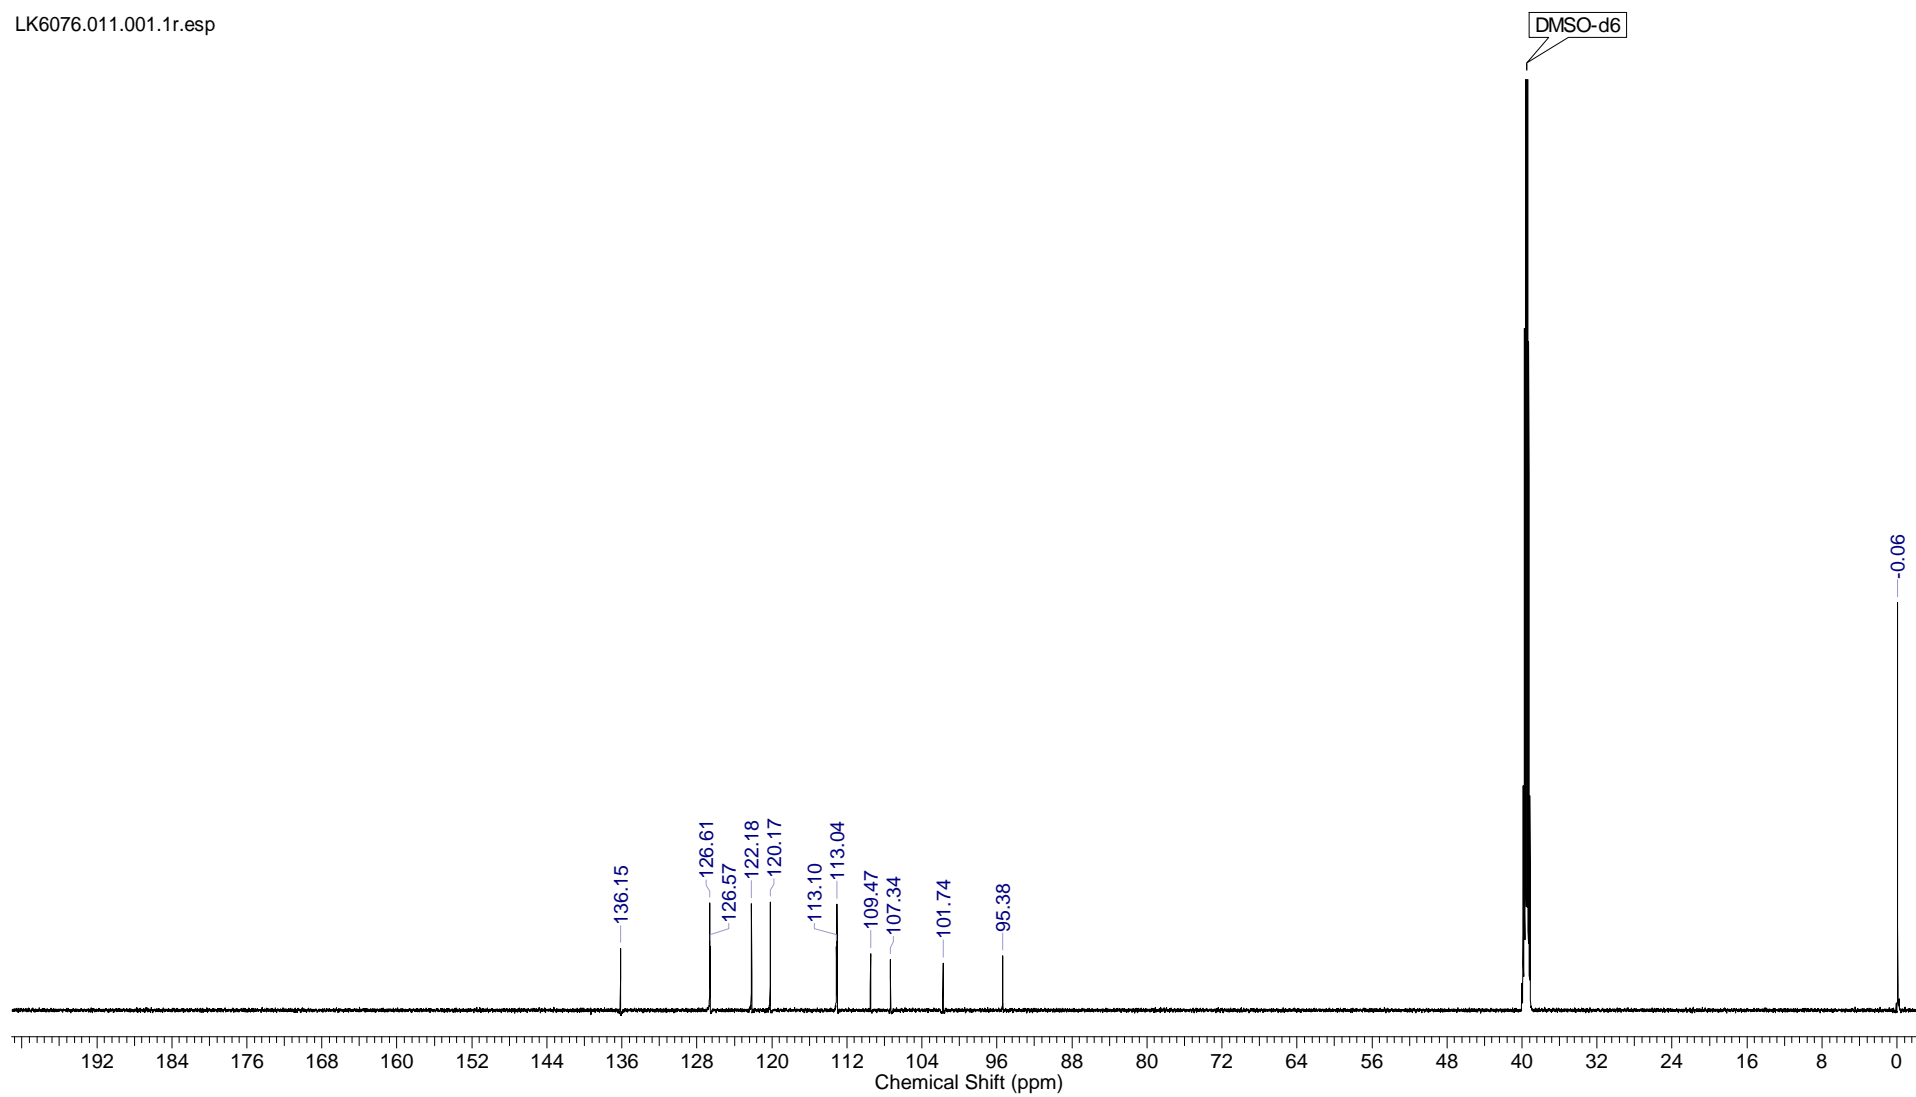

3-(phenylethynyl)-1H-indole-2-carbonitrile (**3b**)  $^1\text{H}$  NMR (700 MHz,  $\text{CDCl}_3$ )

3b 1H.esp

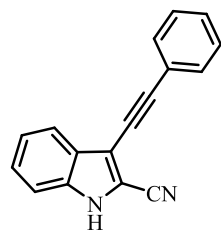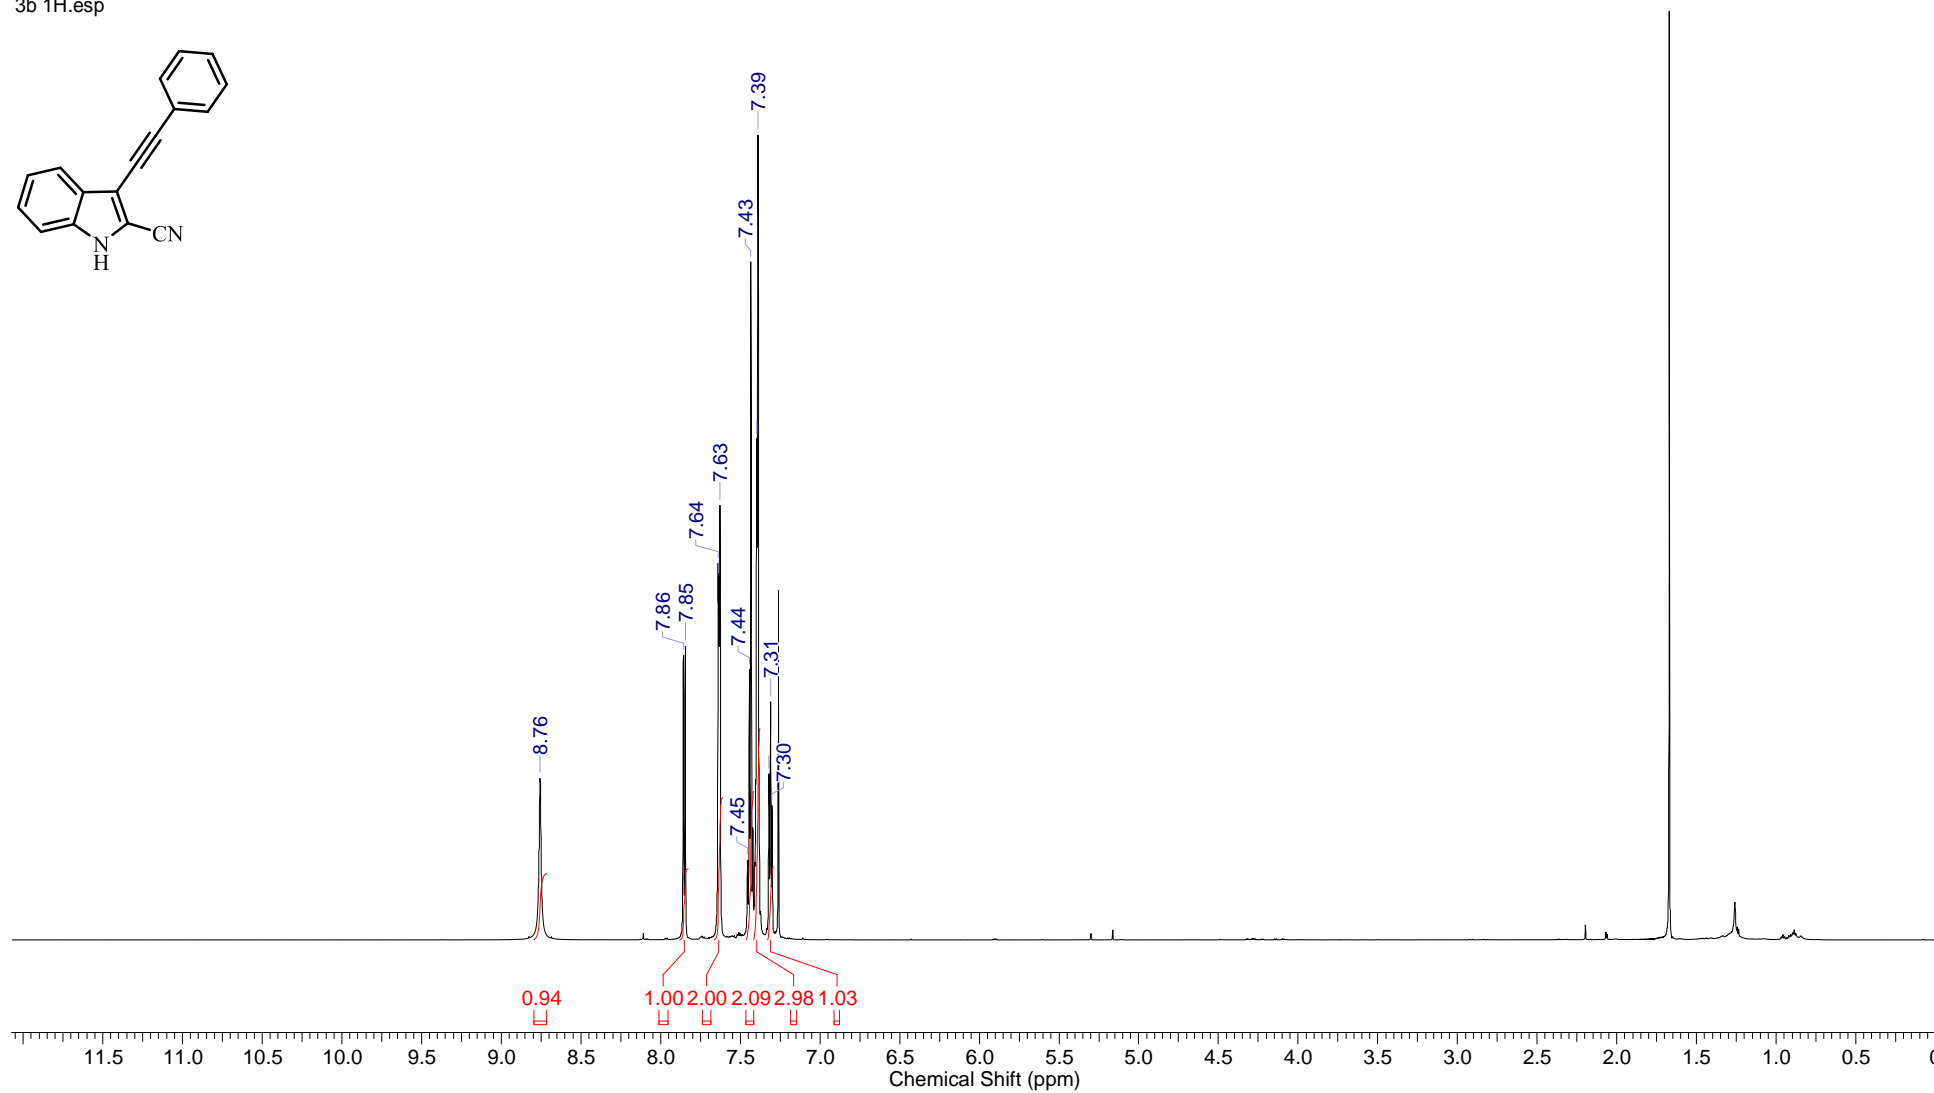

3-(phenylethynyl)-1H-indole-2-carbonitrile (**3b**)  $^{13}\text{C}$  {1H} NMR ( $\text{CDCl}_3$ , 177 MHz)

3b 13C.esp

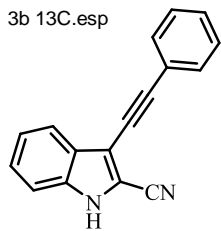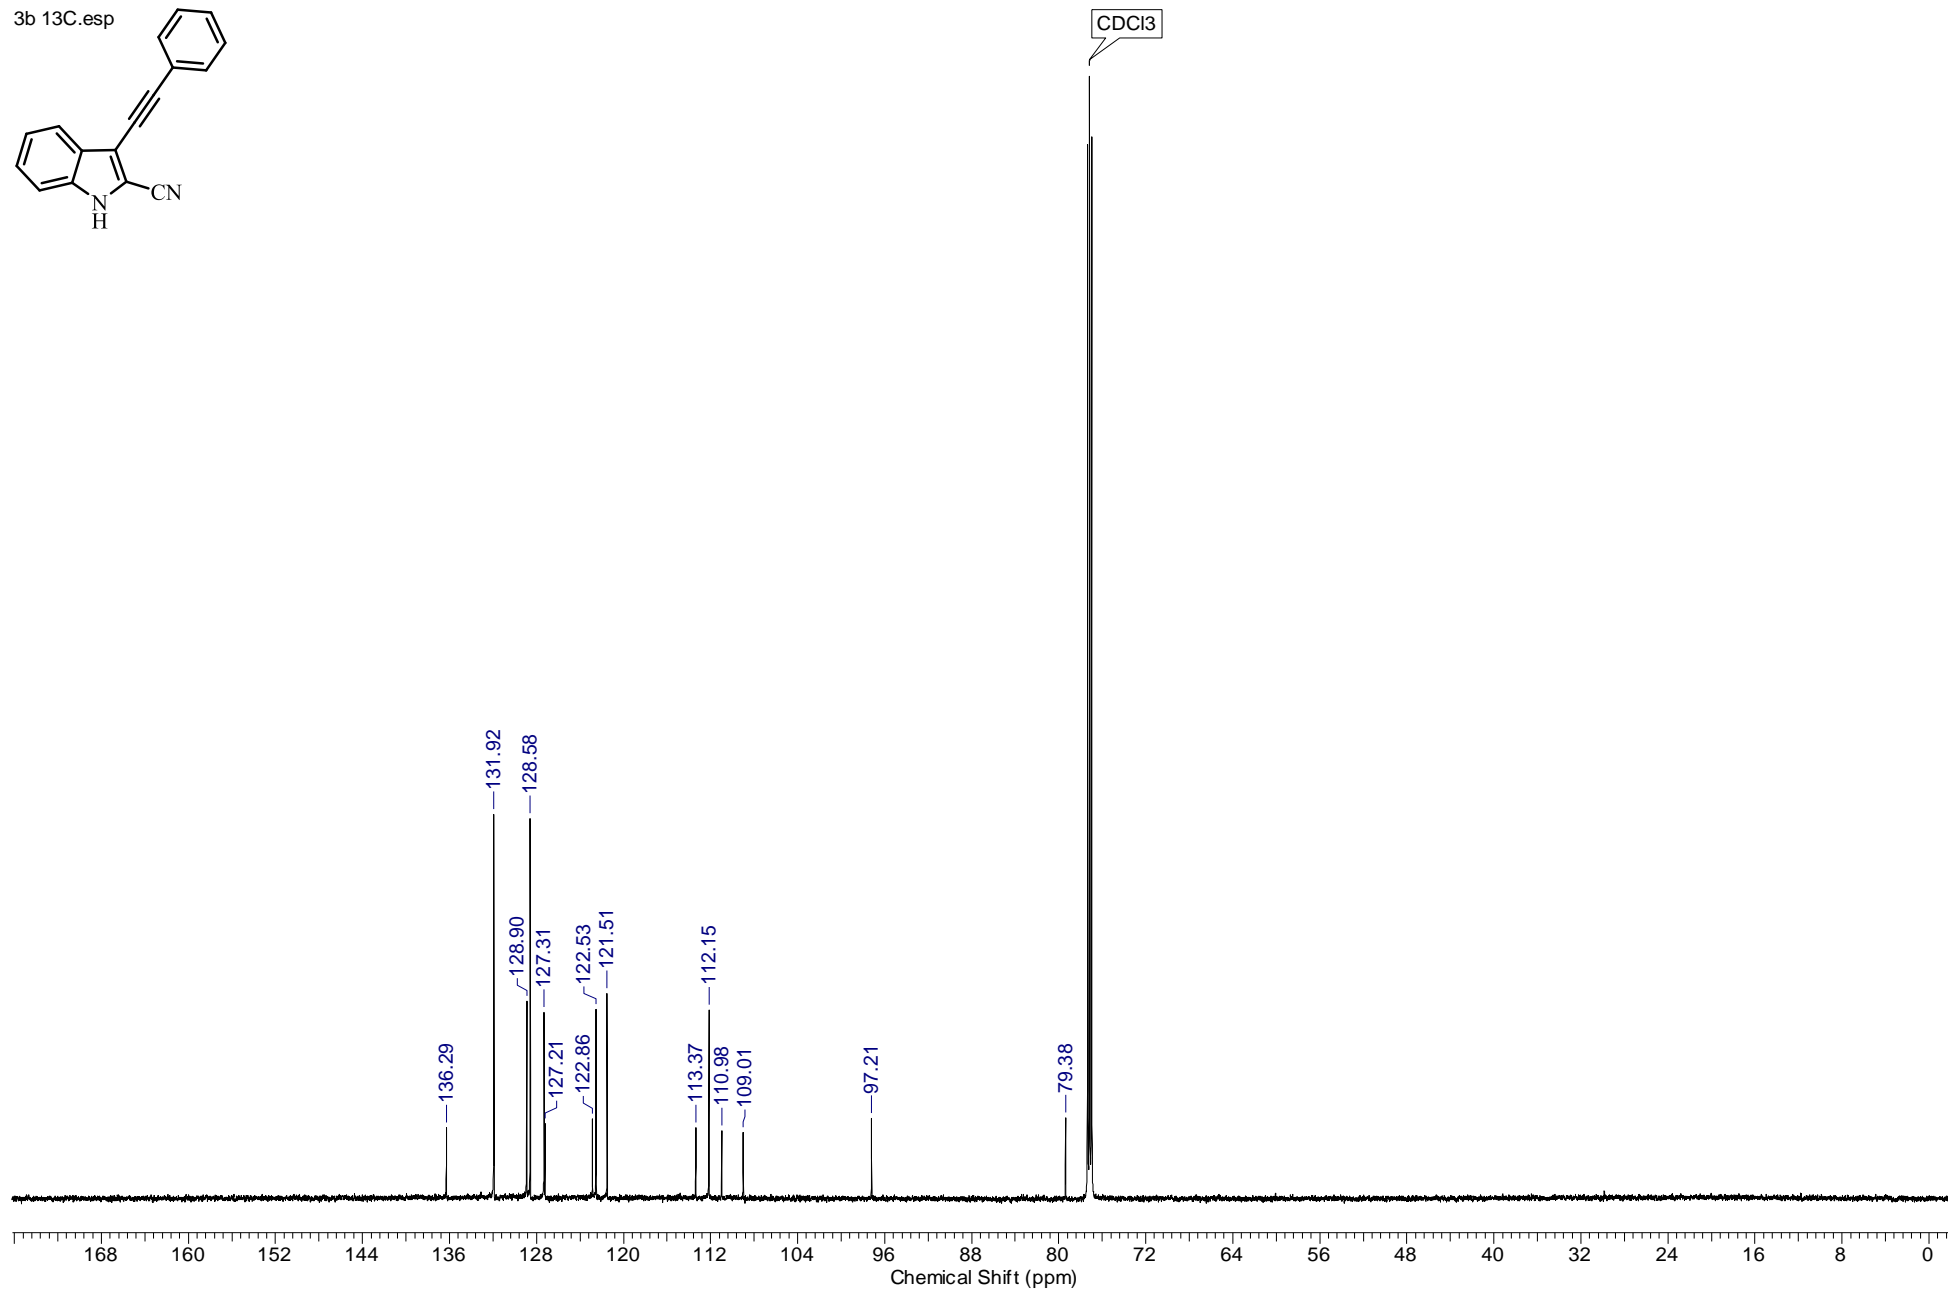



5-chloro-3-(phenylethynyl)-1H-indole-2-carbonitrile (**3c**)  $^1\text{H}$  {1H} NMR (700 MHz,  $\text{CDCl}_3$ )

3c 1H.esp

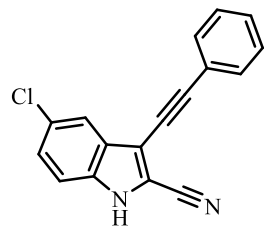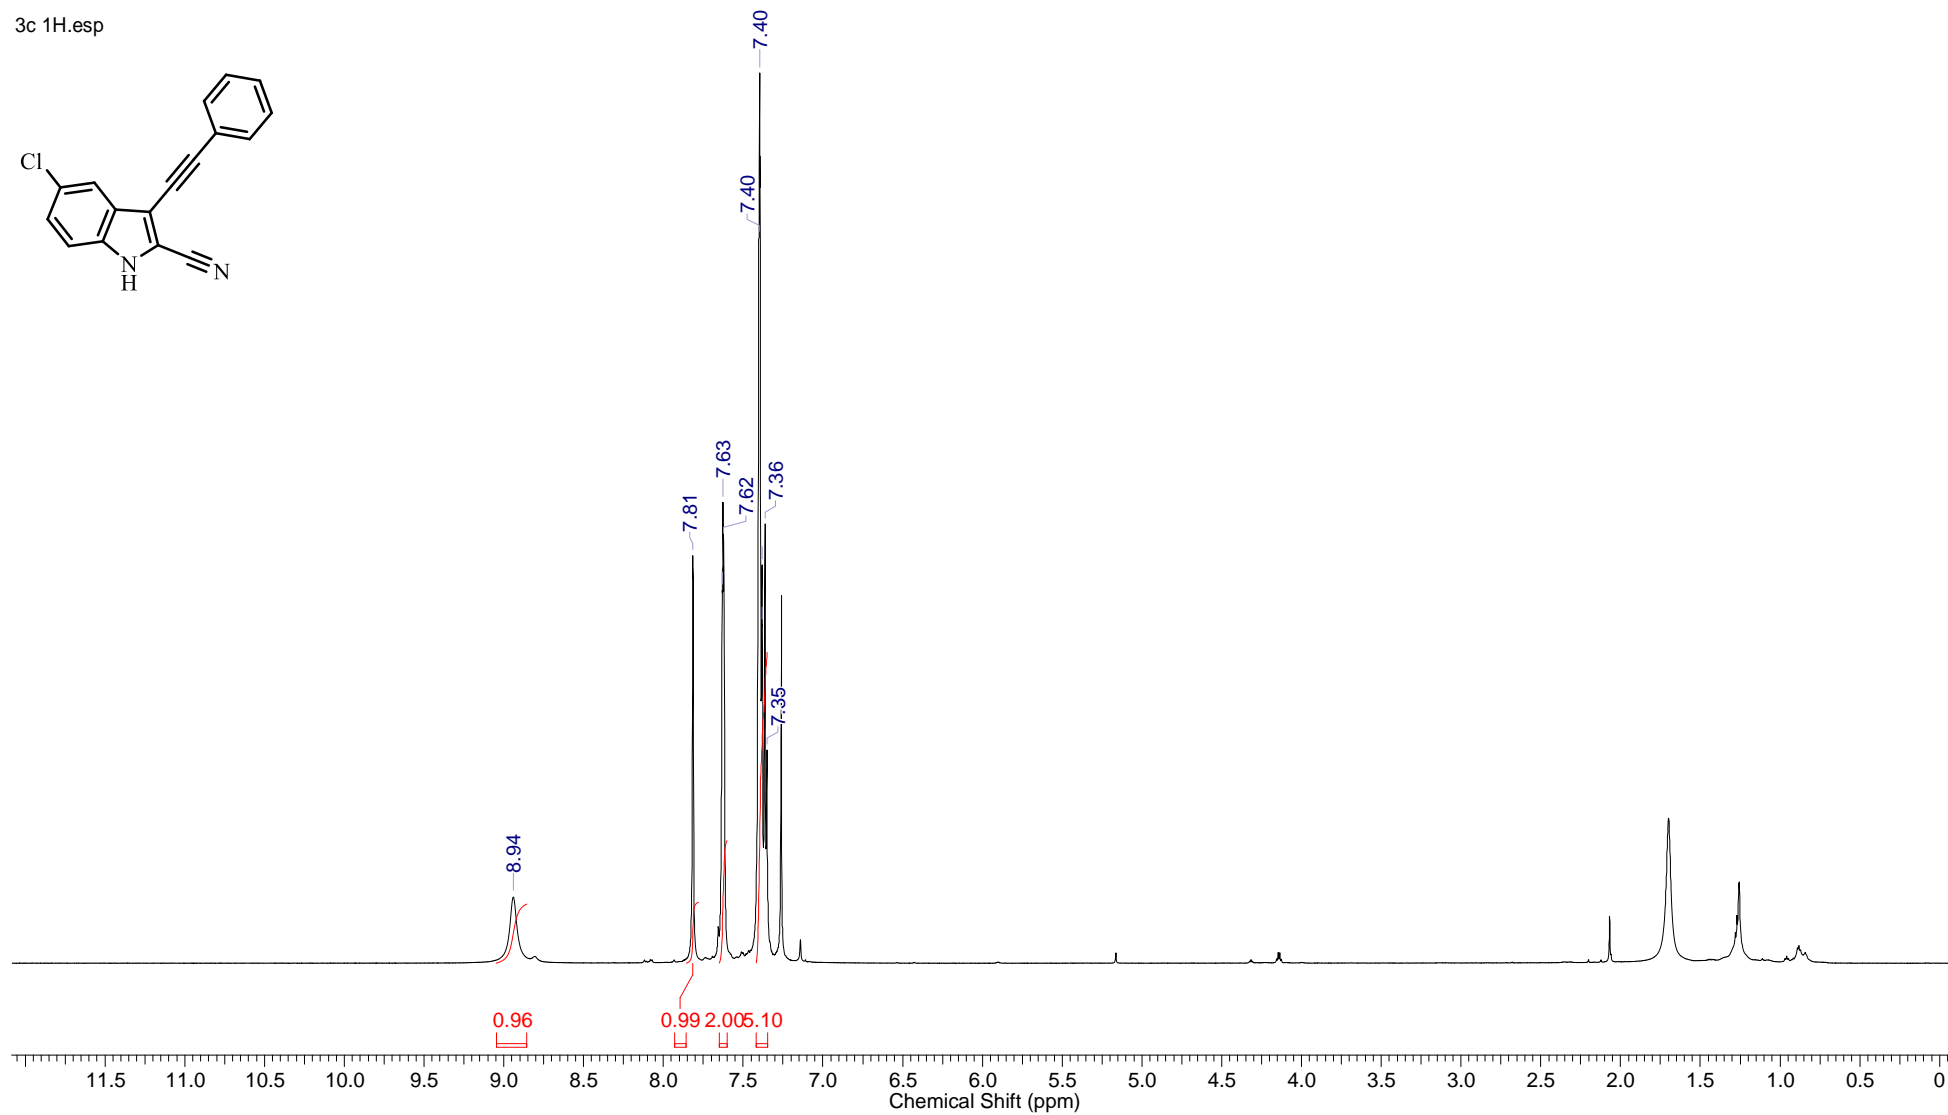

5-chloro-3-(phenylethynyl)-1H-indole-2-carbonitrile (**3c**)  $^{13}\text{C}$  {1H} NMR (177 MHz,  $\text{CDCl}_3$ )

3c 13C.esp

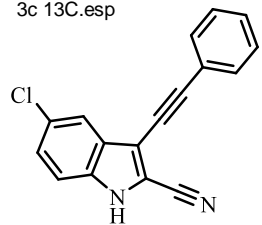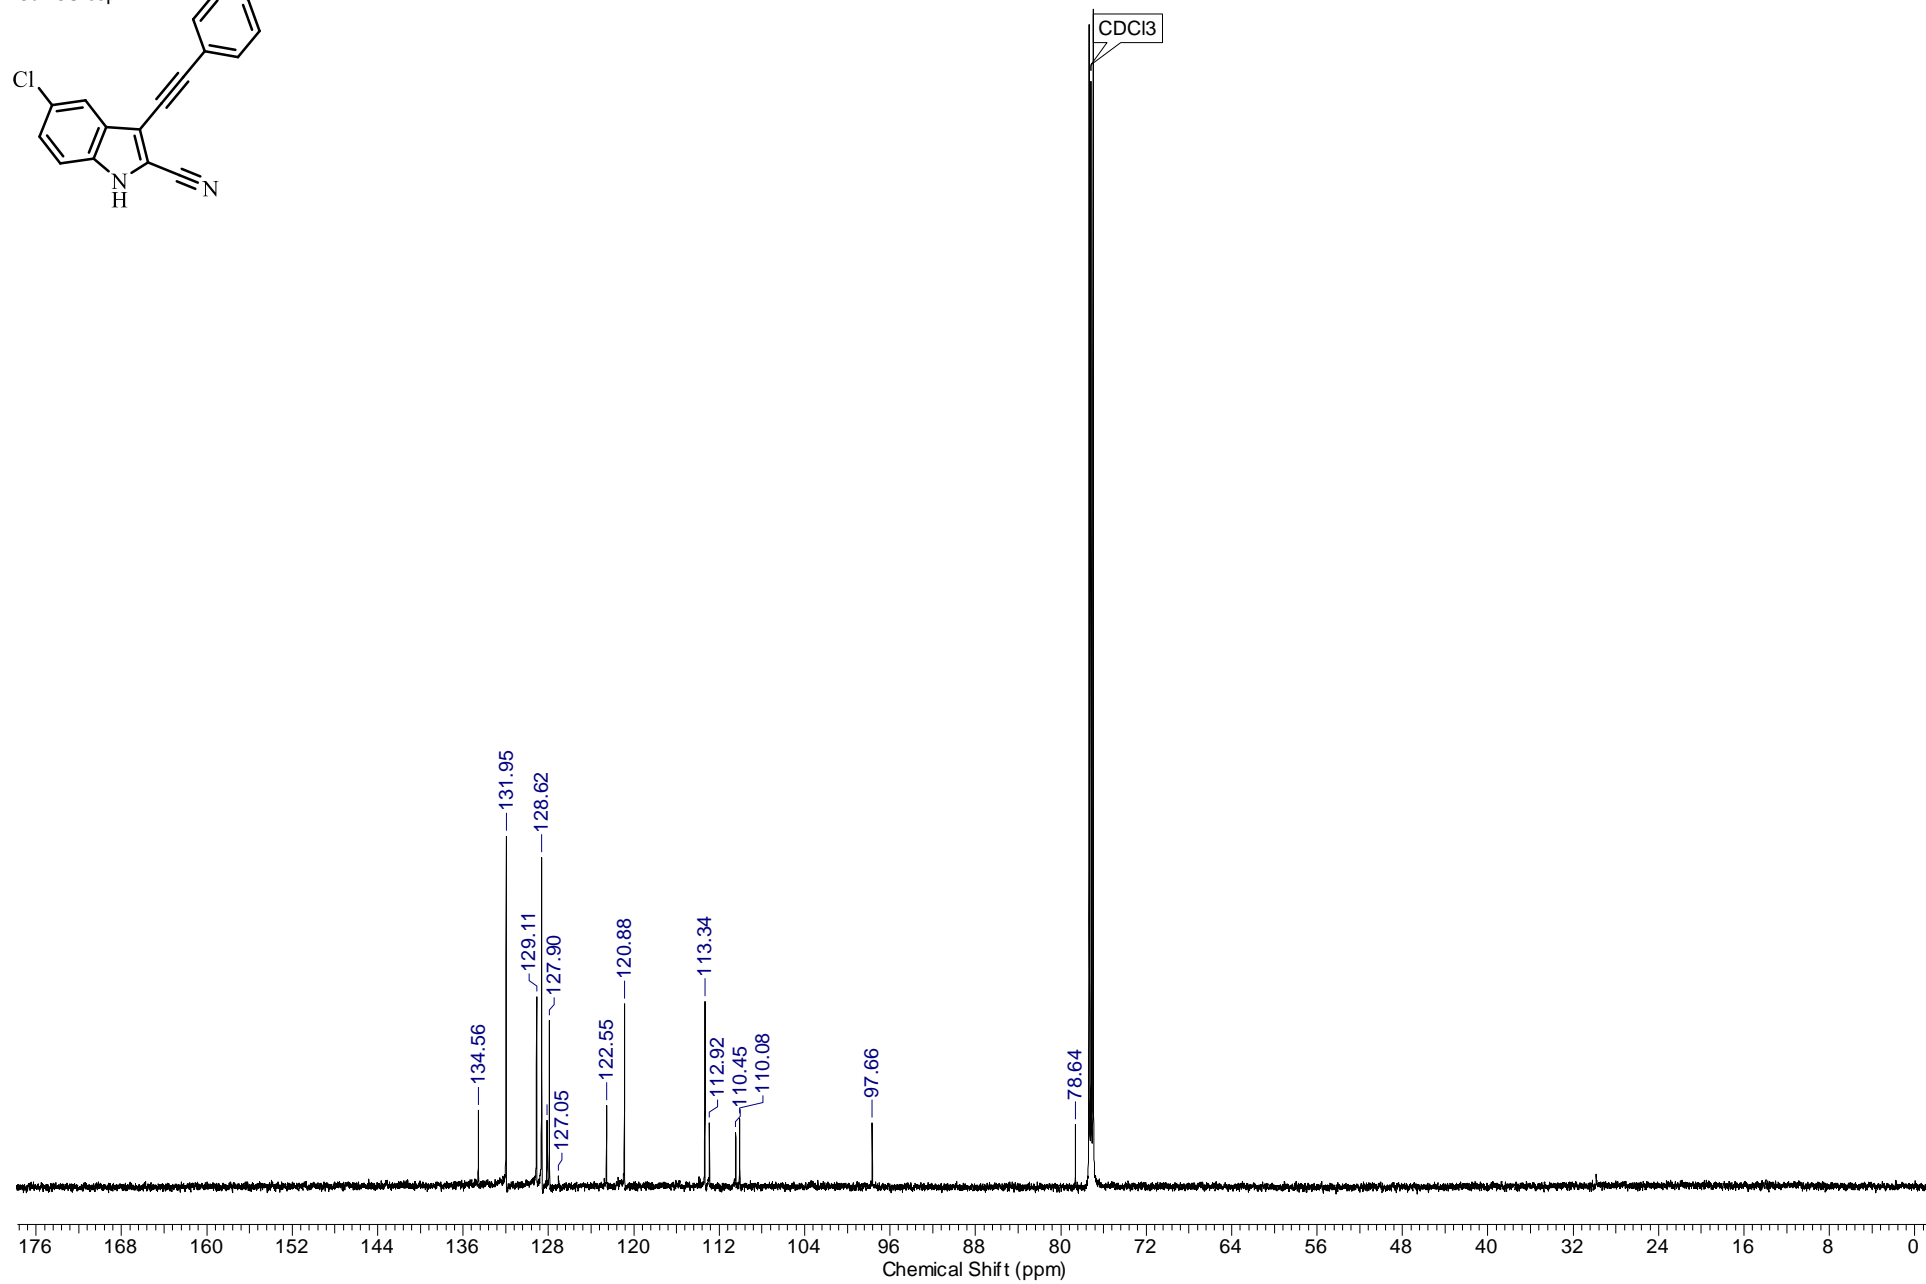

3-((4-fluorophenyl)ethynyl)-1H-indole-2-carbonitrile (**3d**) <sup>1</sup>H NMR (700 MHz, CDCl<sub>3</sub>)

3d 1H.esp

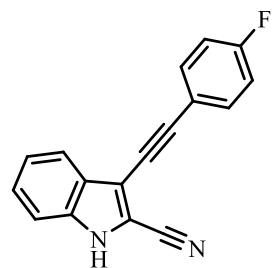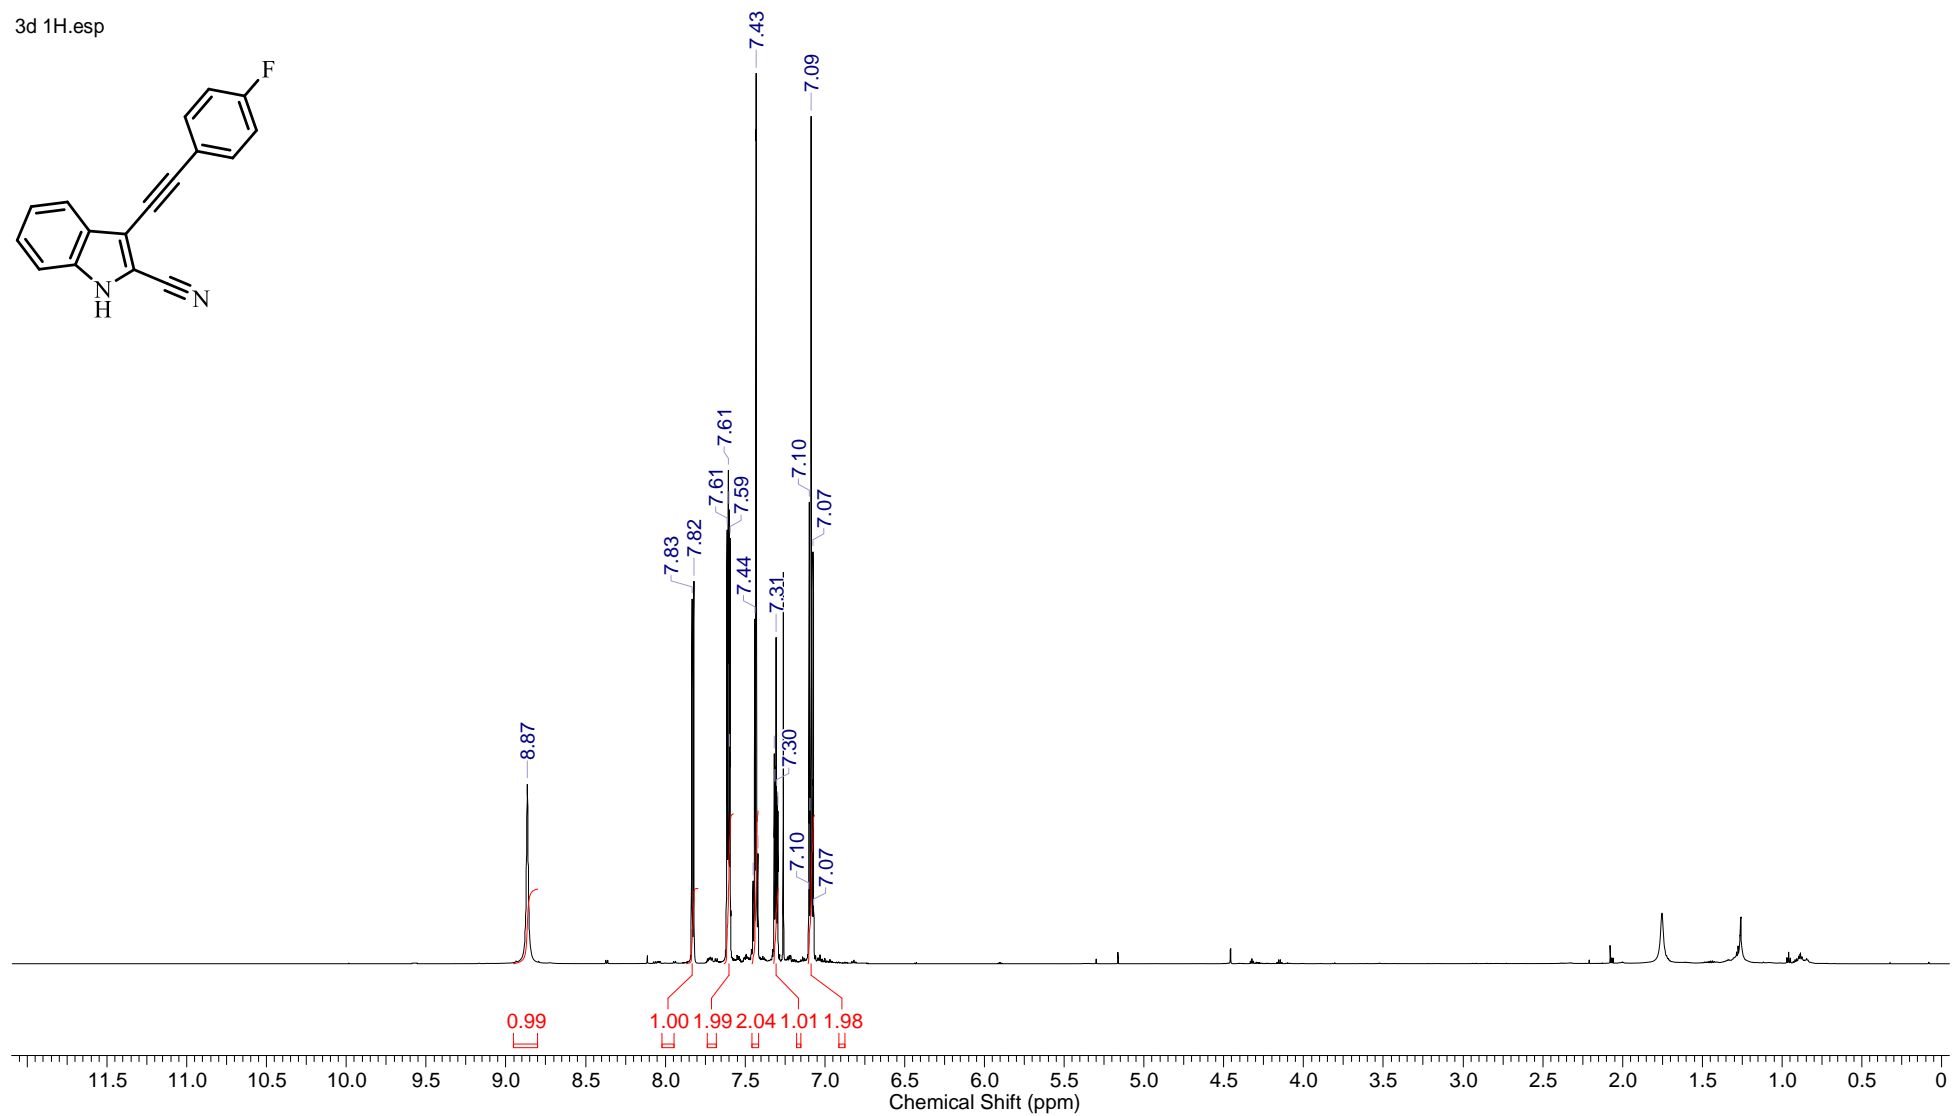

3-((4-fluorophenyl)ethynyl)-1H-indole-2-carbonitrile (**3d**)  $^{13}\text{C}$  {1H} NMR (177 MHz,  $\text{CDCl}_3$ )

3d 13C.esp

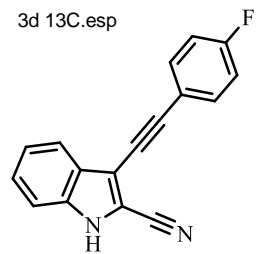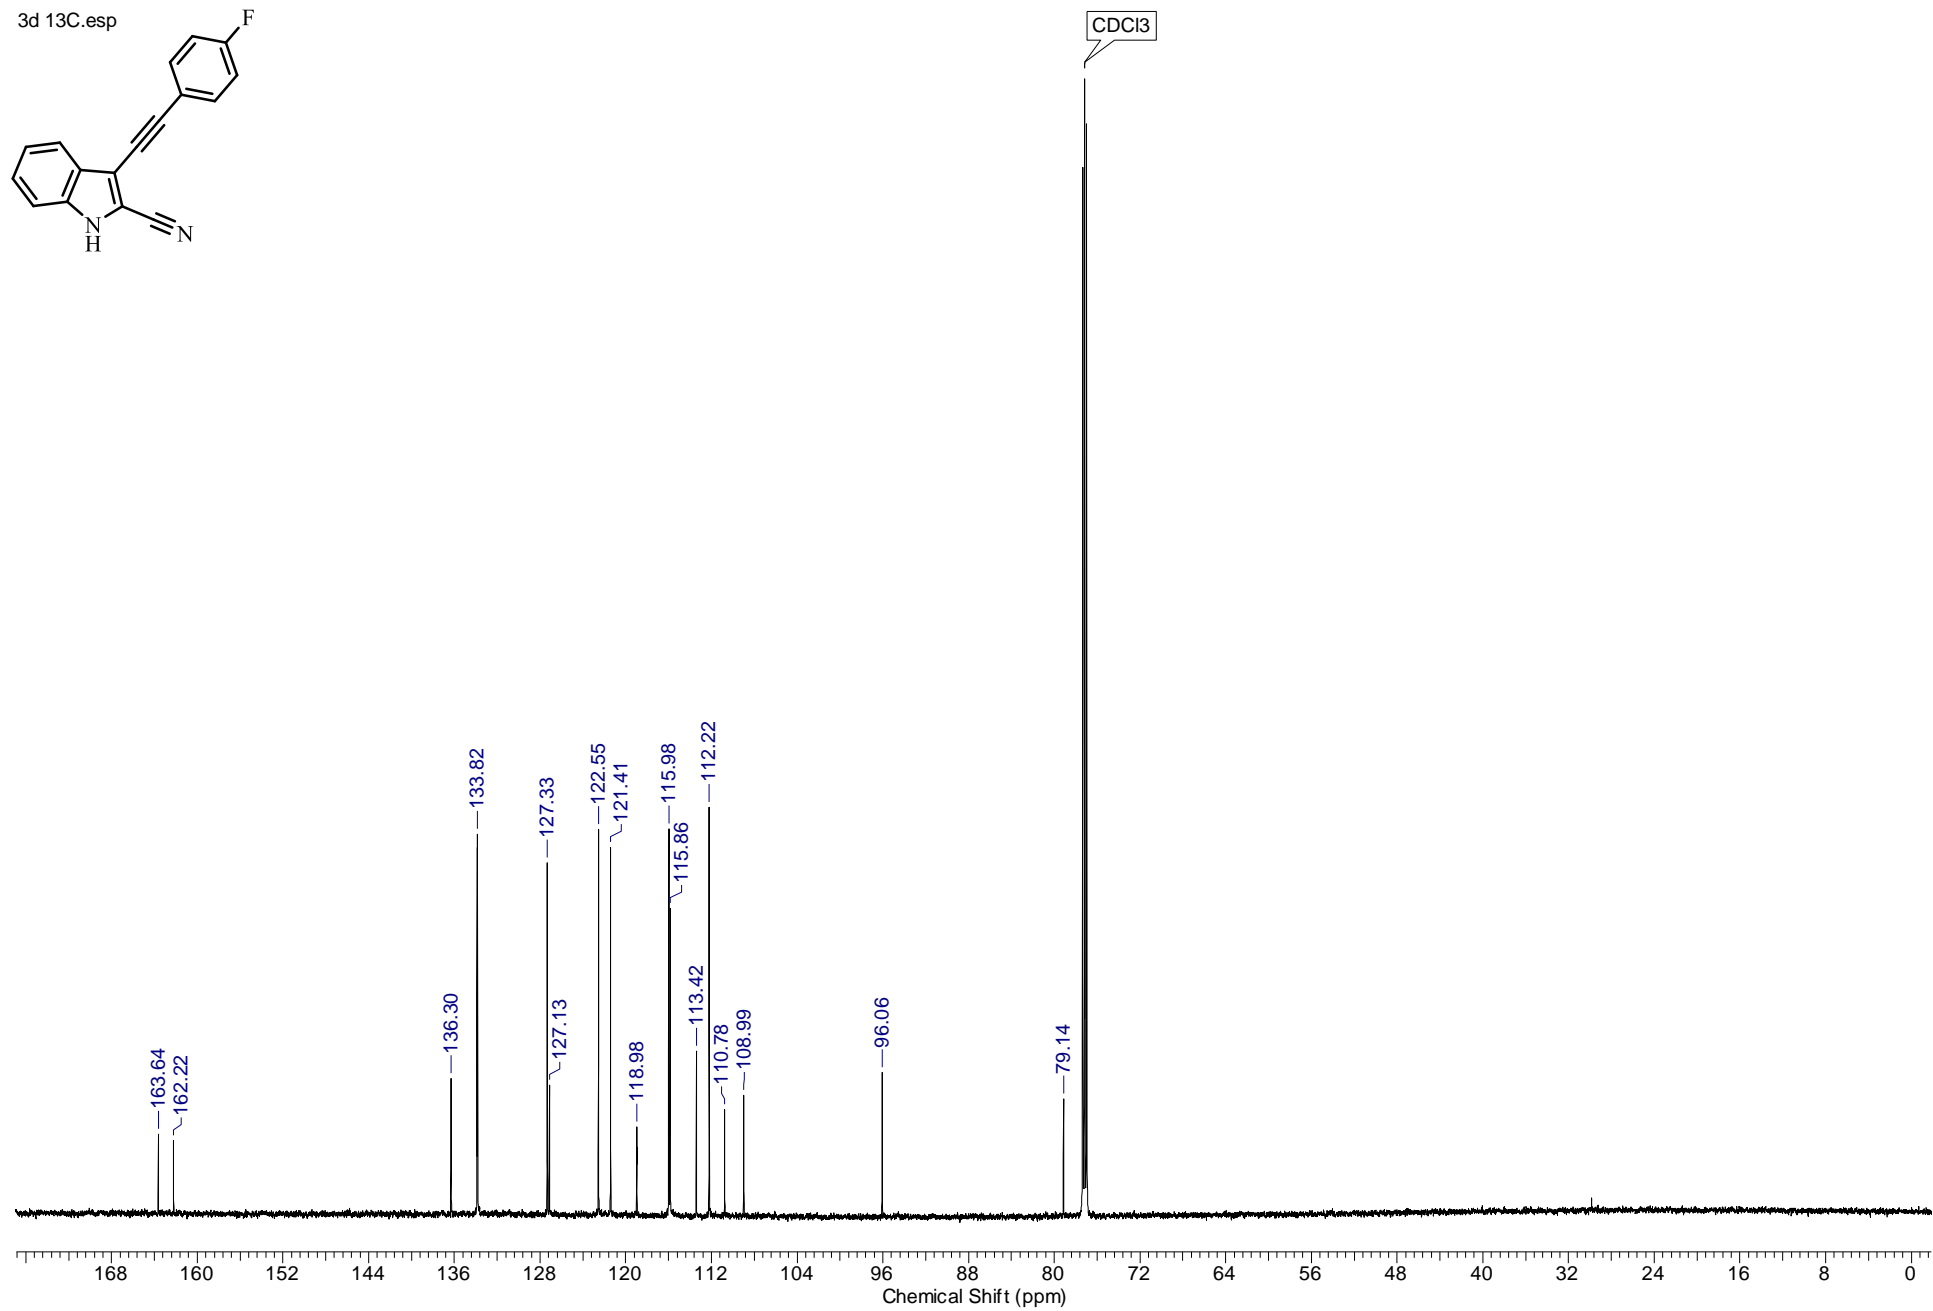

5-chloro-3-((4-fluorophenyl)ethynyl)-1H-indole-2-carbonitrile (**3e**)  $^1\text{H}$  NMR (700 MHz,  $\text{DMSO-d}_6$ )

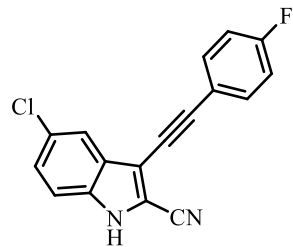

LK6077.010.001.1r.esp

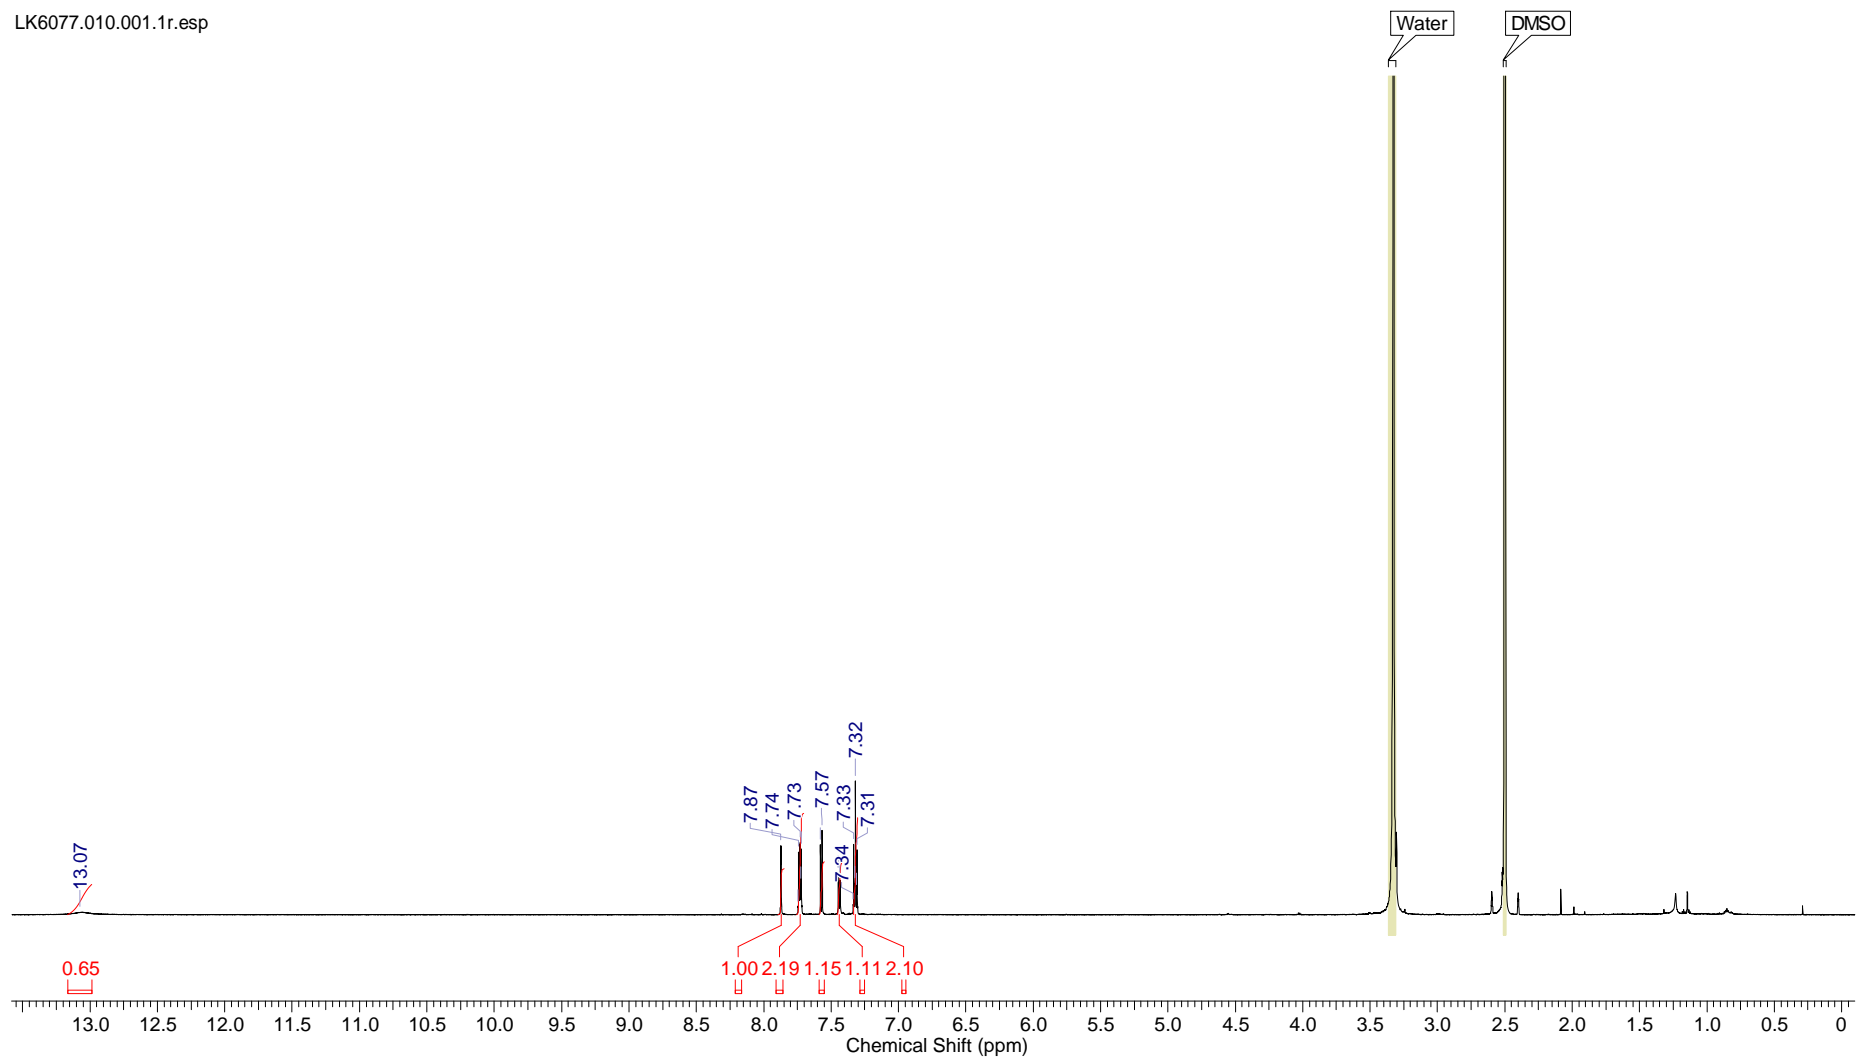

5-ethyl-3-((4-fluorophenyl)ethynyl)-1H-indole-2-carbonitrile (**3f**) <sup>1</sup>H NMR (700 MHz, CDCl<sub>3</sub>)

3f 1H.esp

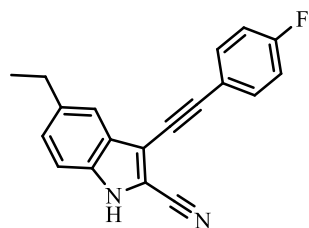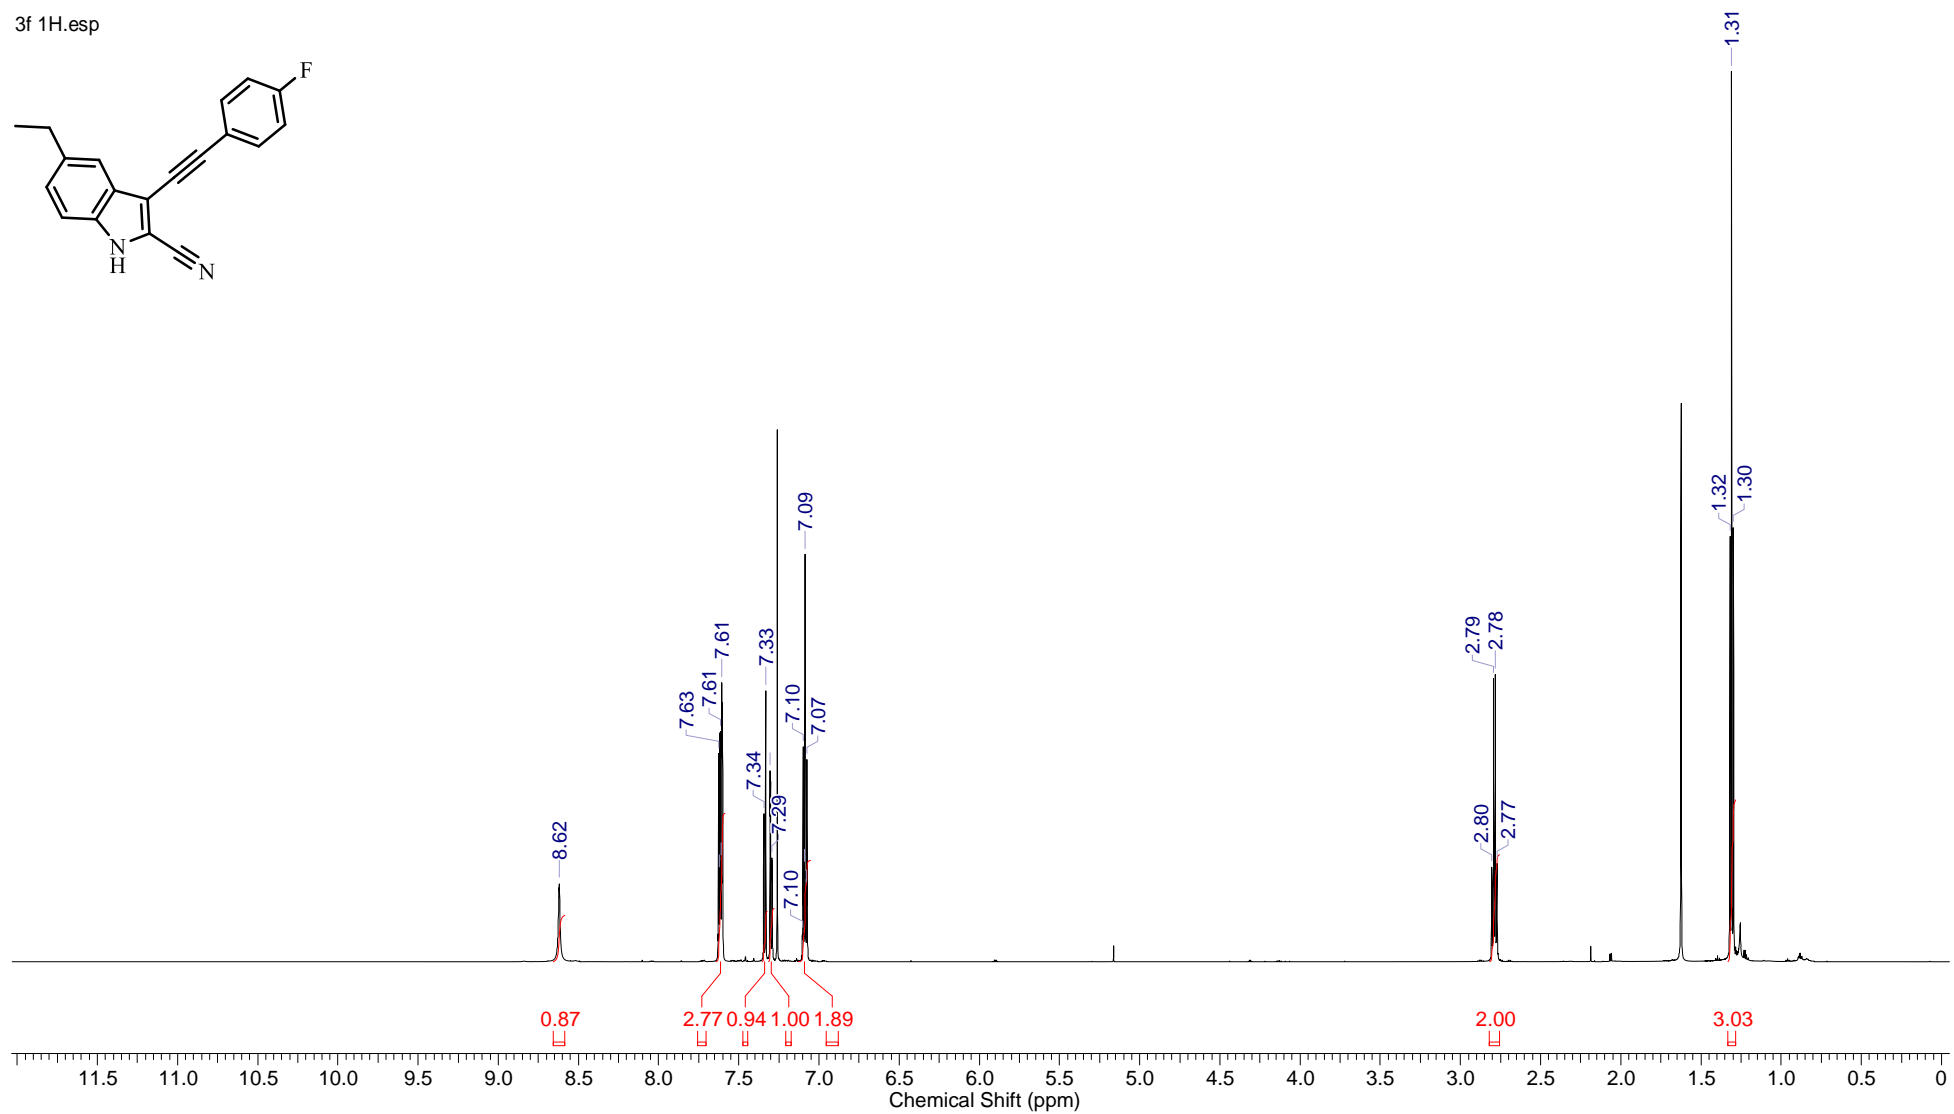

5-ethyl-3-((4-fluorophenyl)ethynyl)-1H-indole-2-carbonitrile (**3f**)  $^{13}\text{C}$  {1H} NMR (177 MHz,  $\text{CDCl}_3$ )

3f 13C.esp

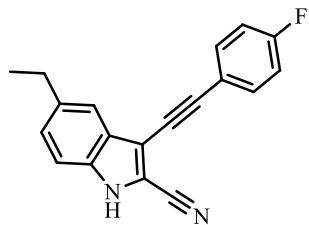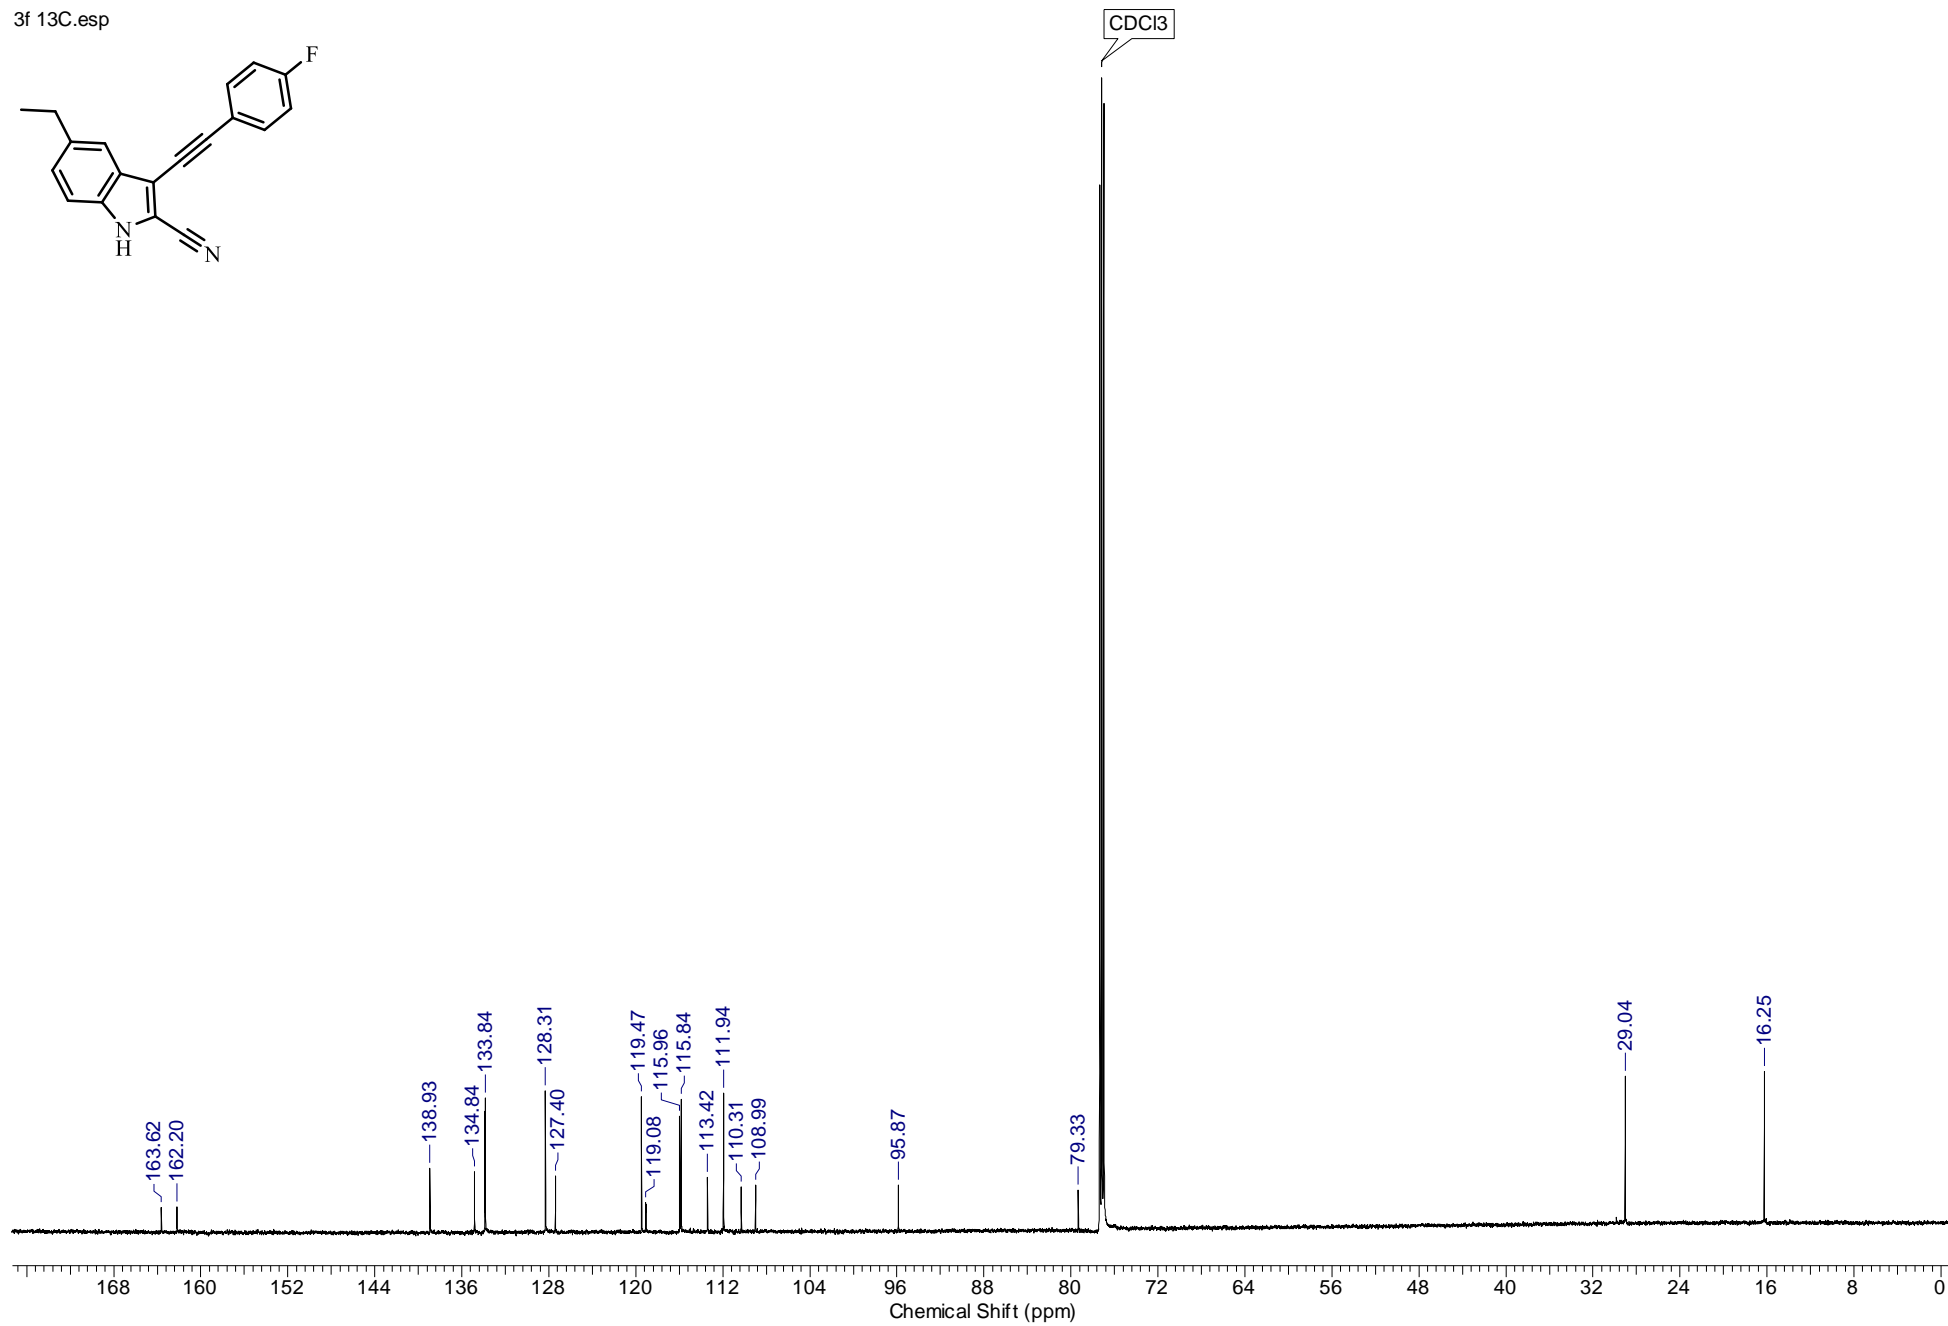

3-ethynyl-1H-indole-2-carbonitrile (**3g**) <sup>1</sup>H NMR (700 MHz, DMSO-d<sub>6</sub>)

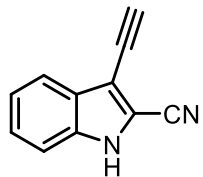

LK6117.010.001.1r.esp

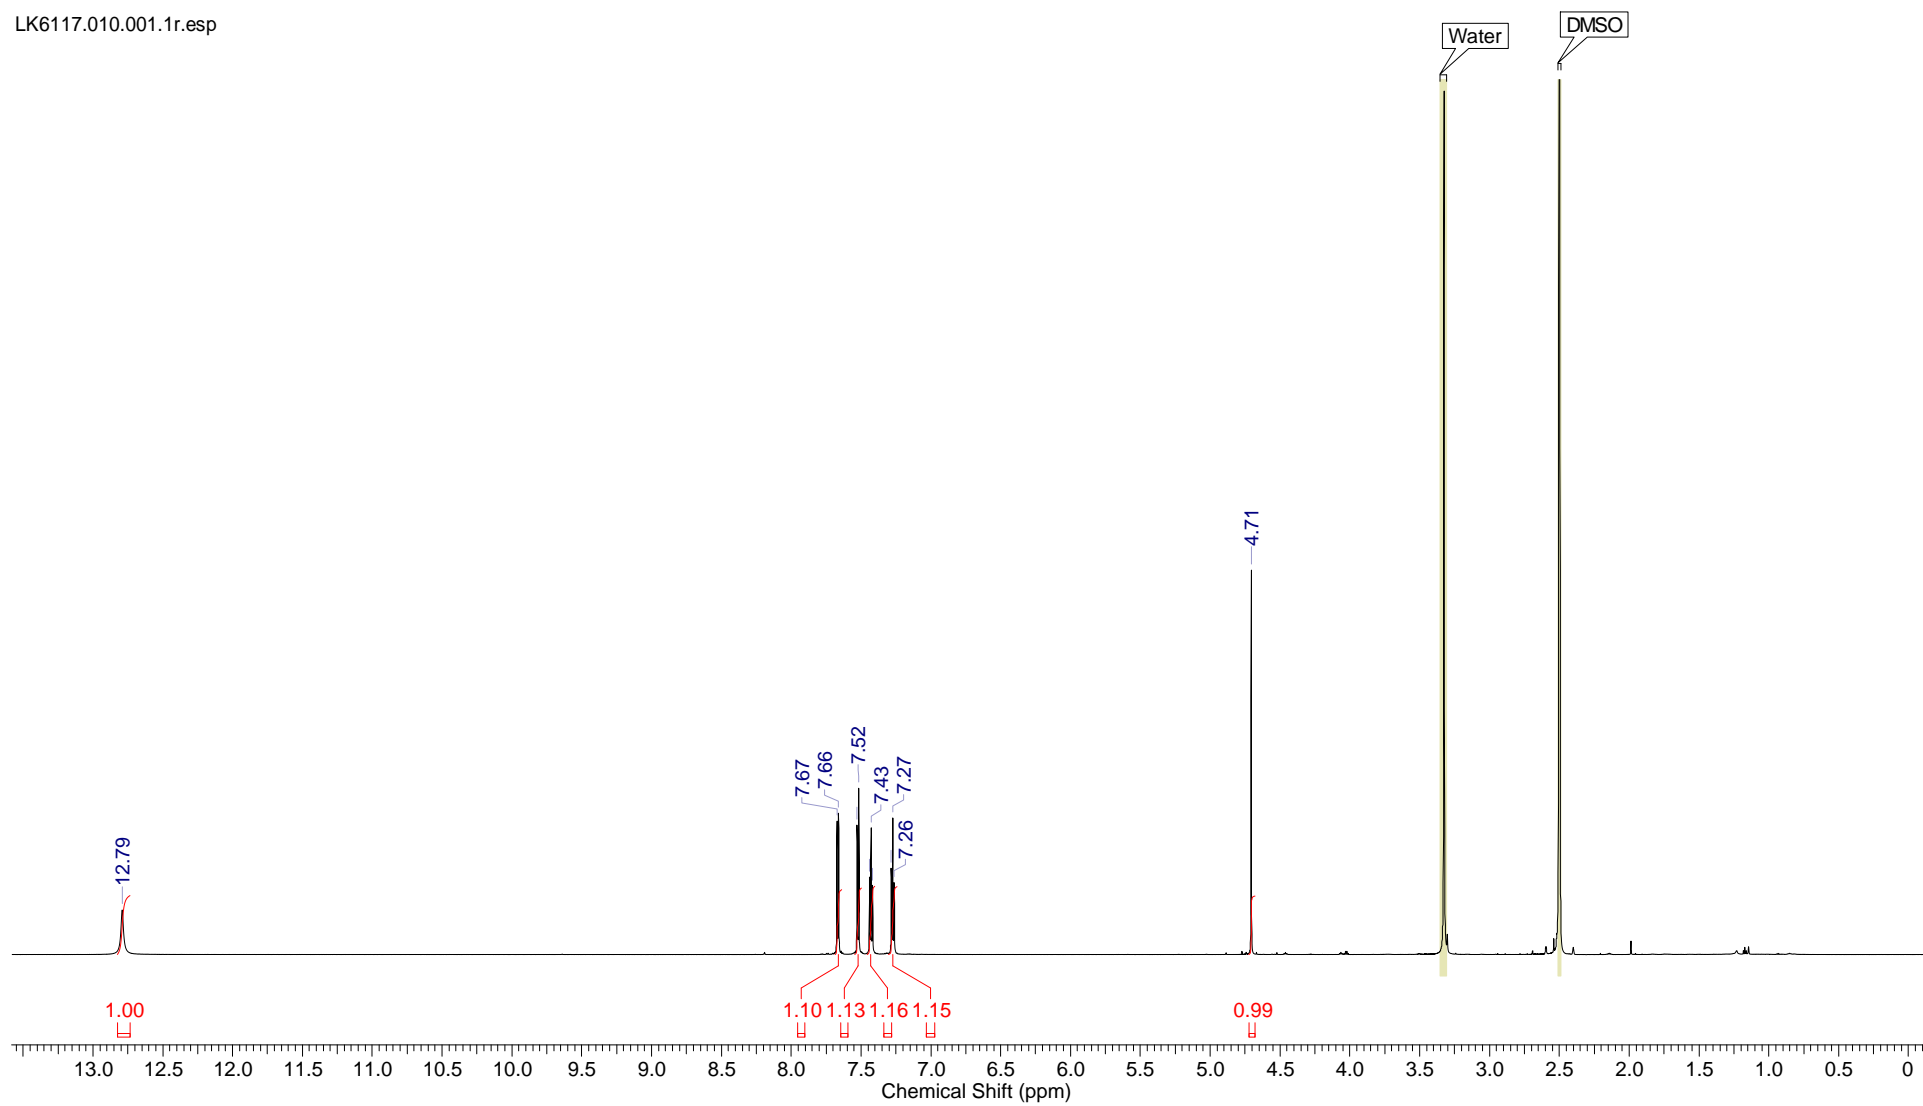



3-ethynyl-1H-indole-2-carbonitrile (**3g**)  $^{13}\text{C}$  {1H} NMR (177 MHz, DMSO- $d_6$ )



LK6117.011.001.1r.esp

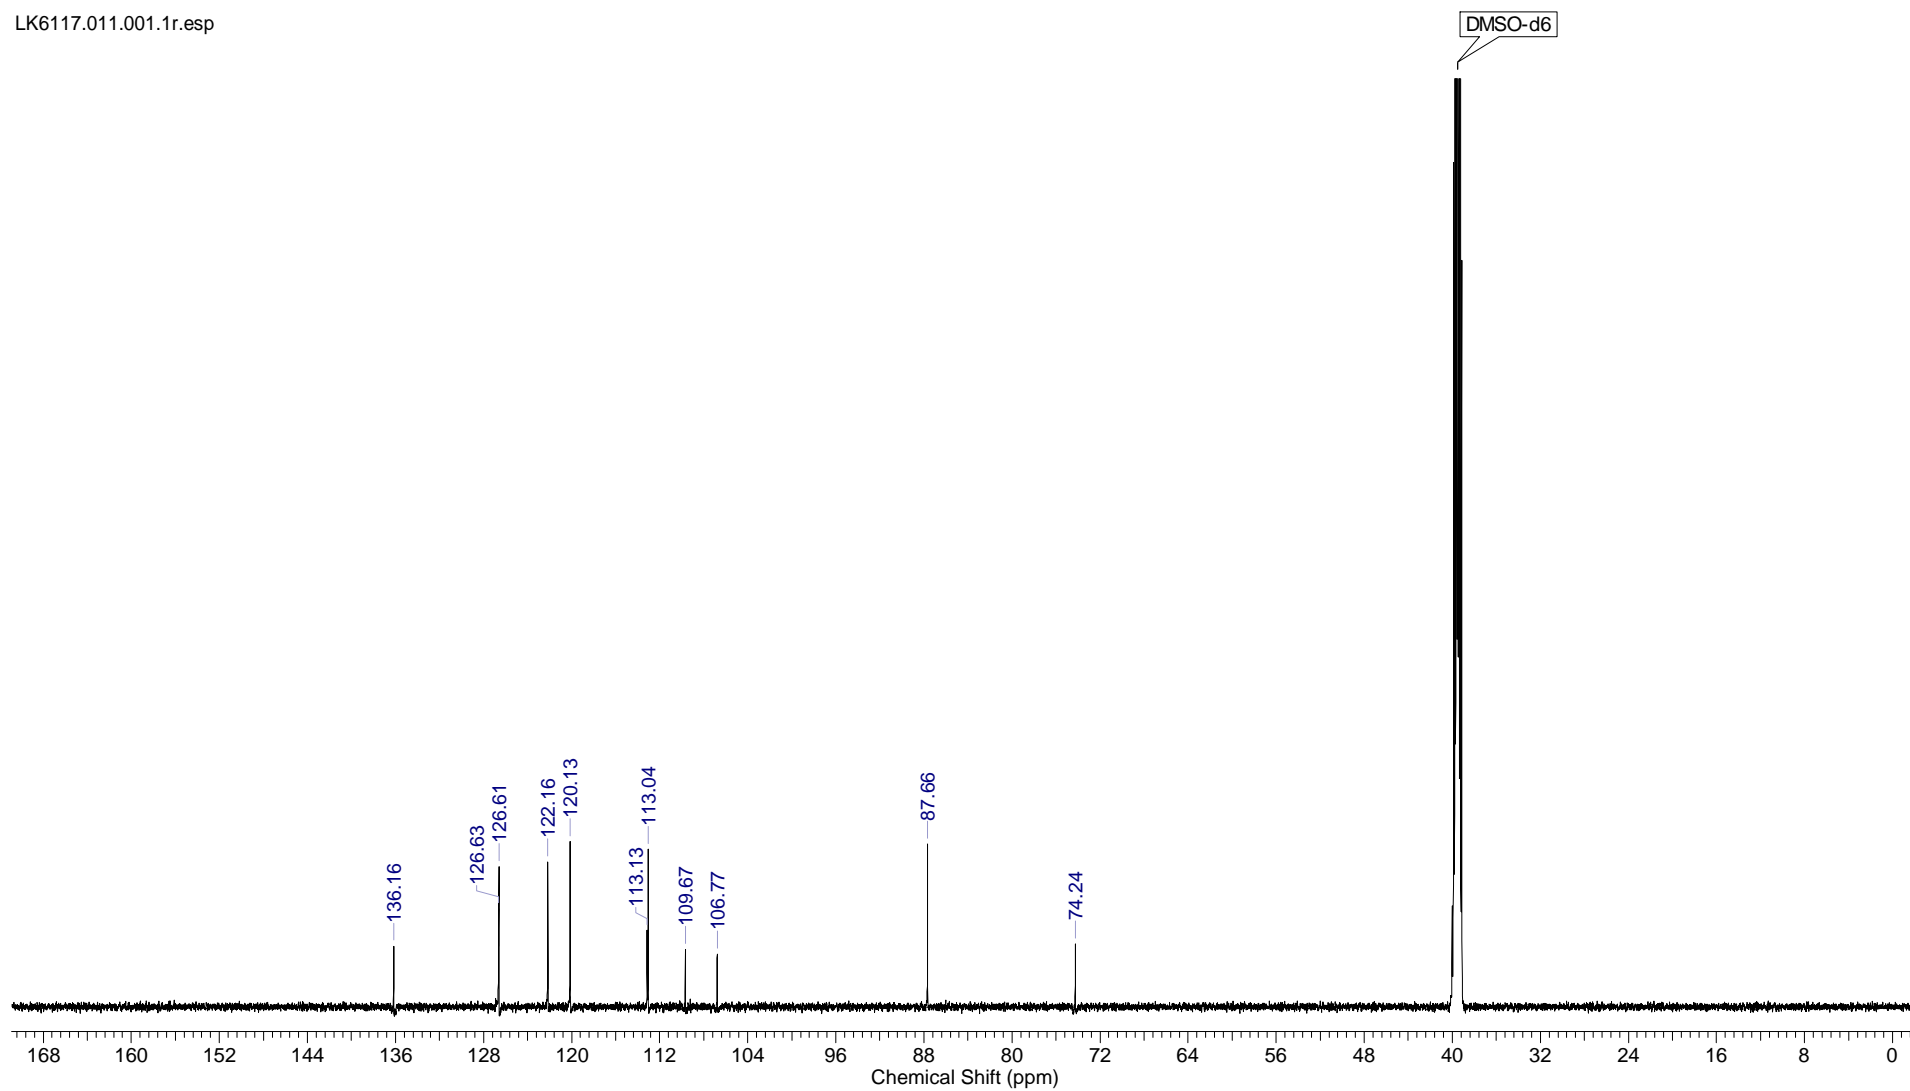

1-methoxy-9H-pyrido[3,4-b]indole (**4a**) <sup>1</sup>H NMR (700 MHz, DMSO-d<sub>6</sub>)

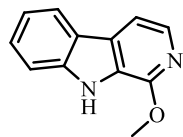

LK5965.010.001.1r.esp

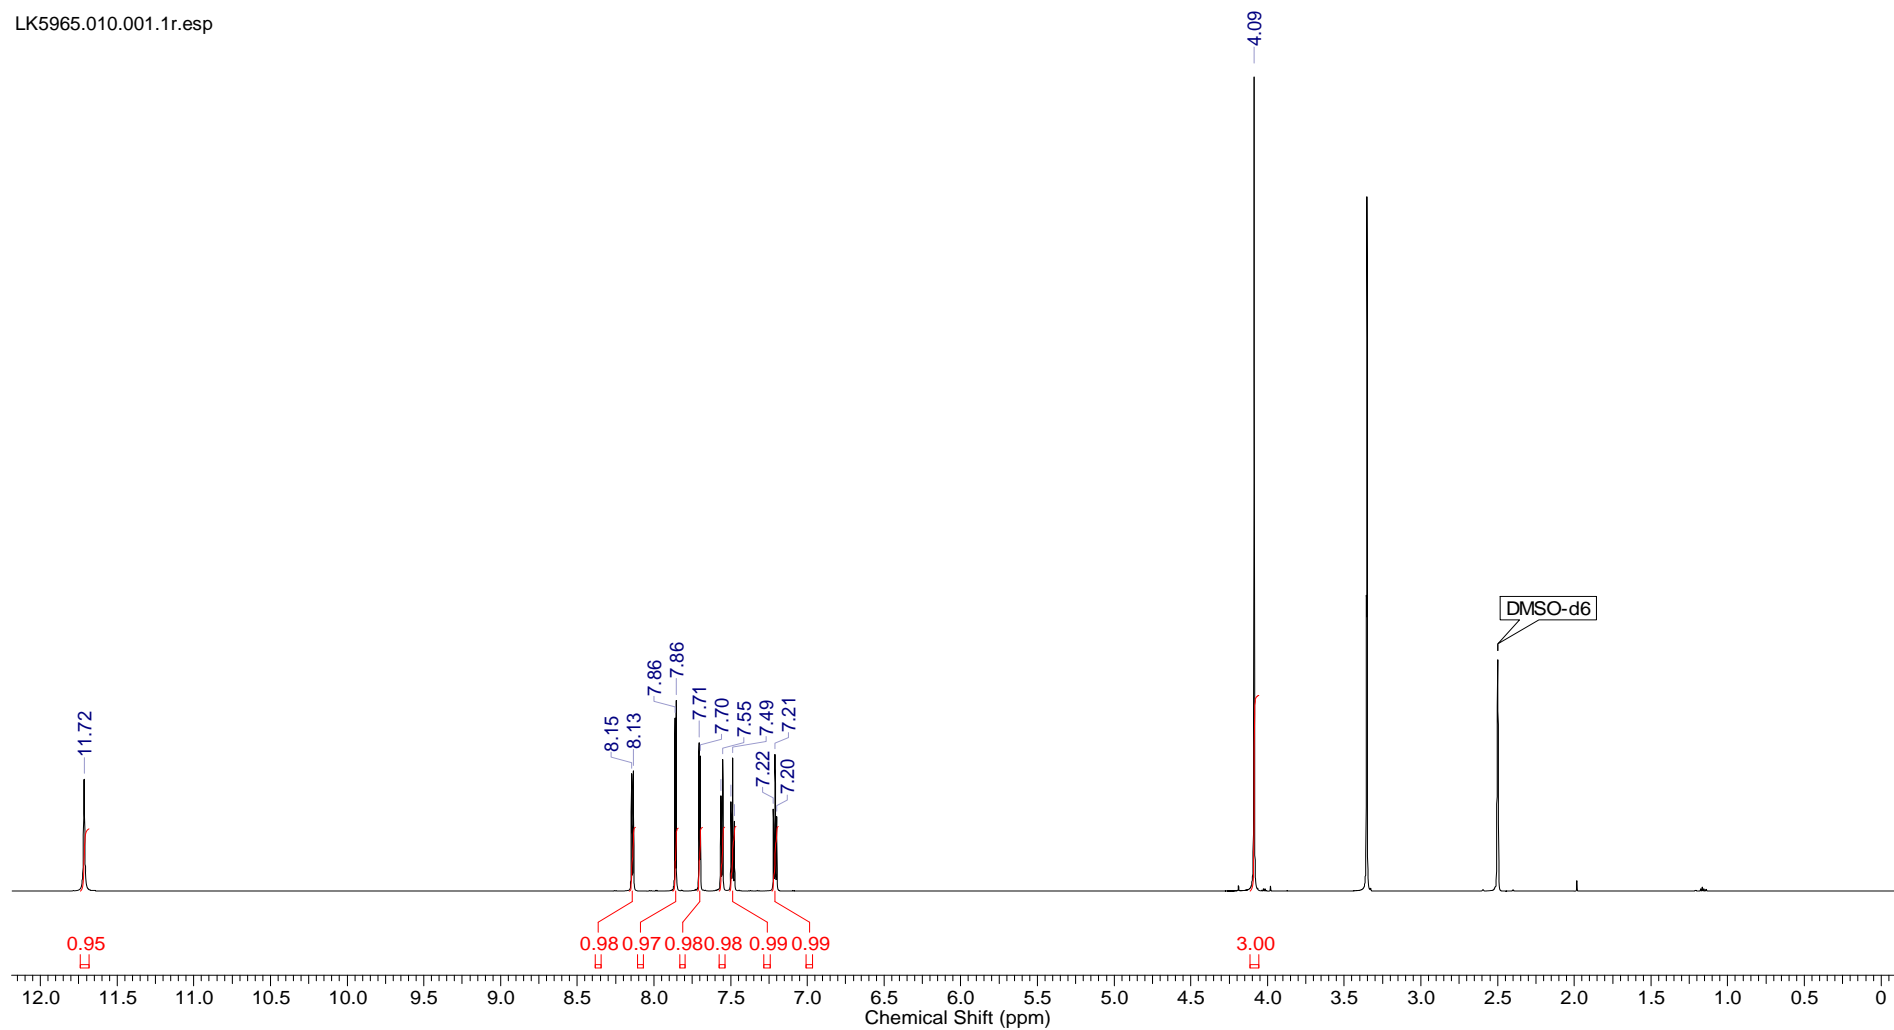

1-methoxy-9H-pyrido[3,4-b]indole (**4a**)  $^{13}\text{C}$  {1H} NMR (177 MHz, DMSO- $d_6$ )

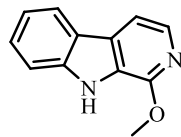

LK5965.011.001.1r.esp

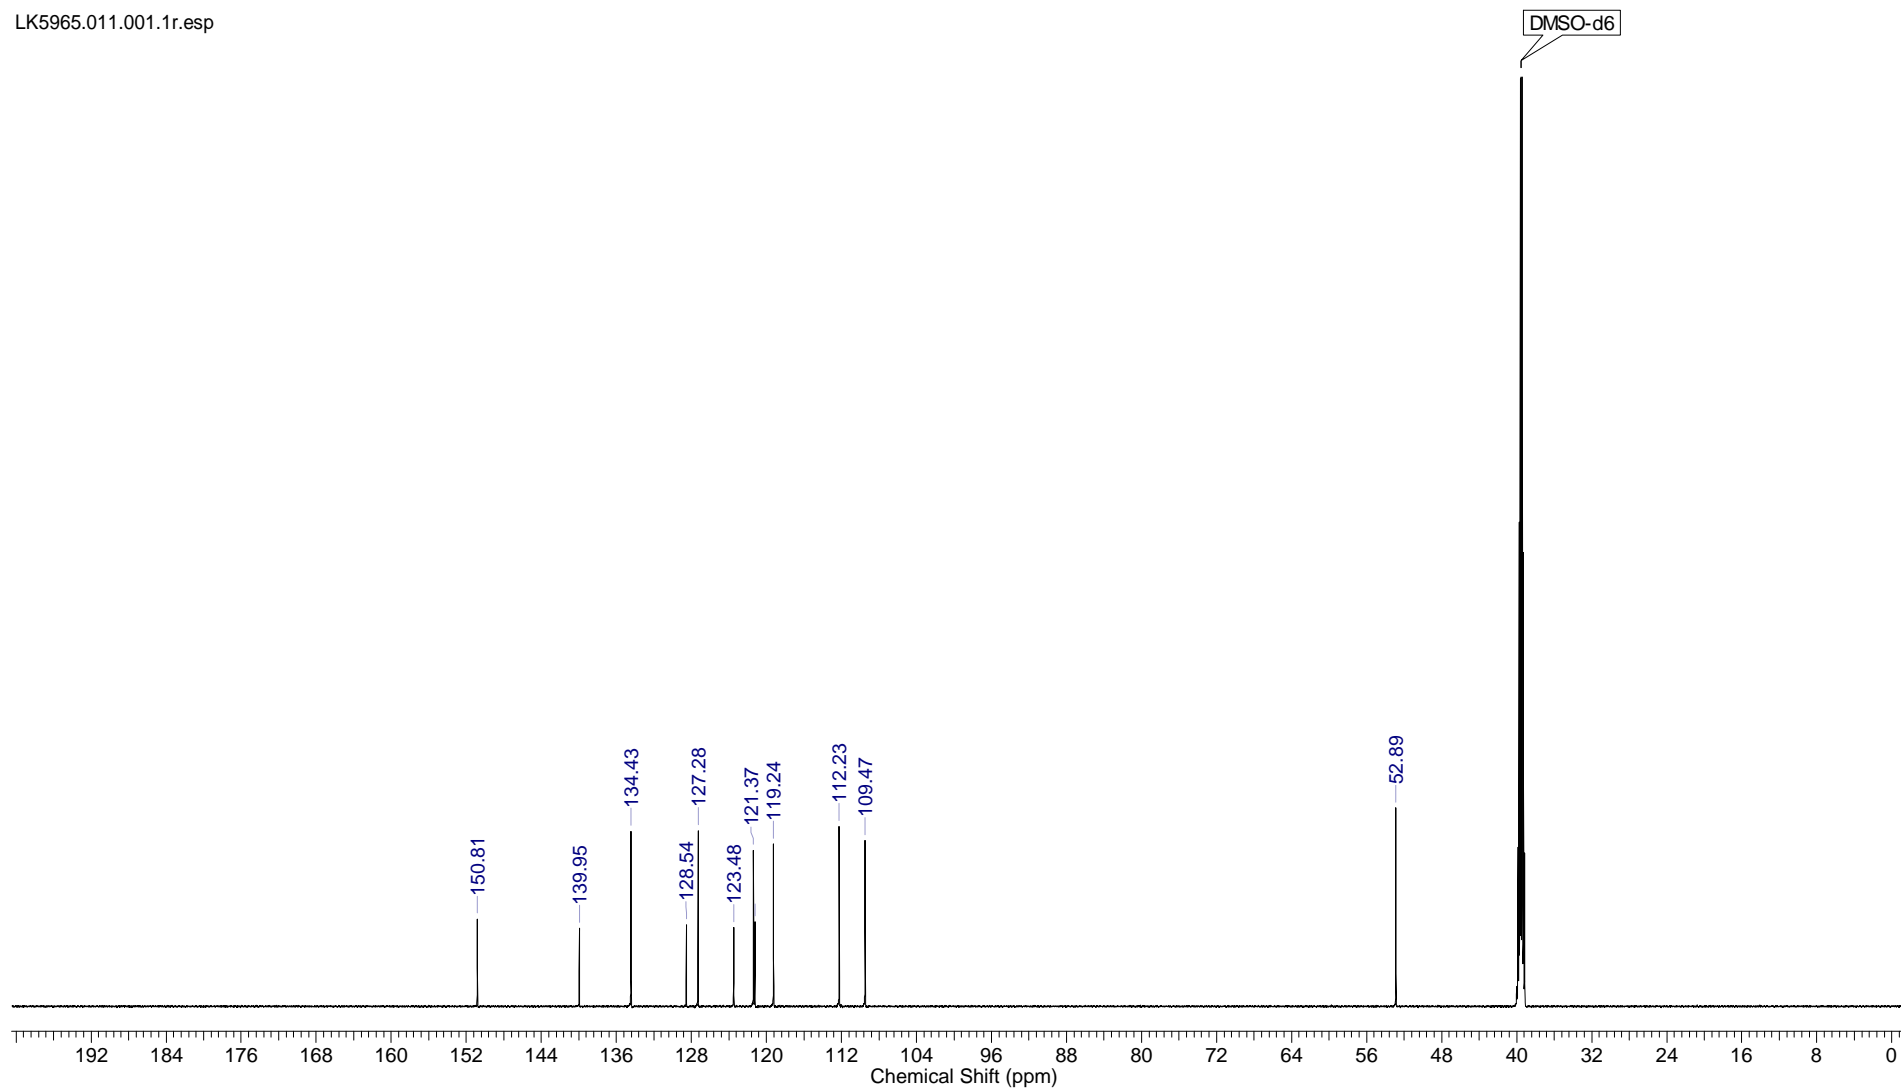

1-methoxy-3-phenyl-9H-pyrido[3,4-b]indole (**4b**) <sup>1</sup>H NMR (700 MHz, DMSO-d<sub>6</sub>)

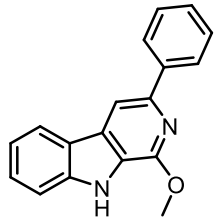

LK5938.010.001.1r.esp

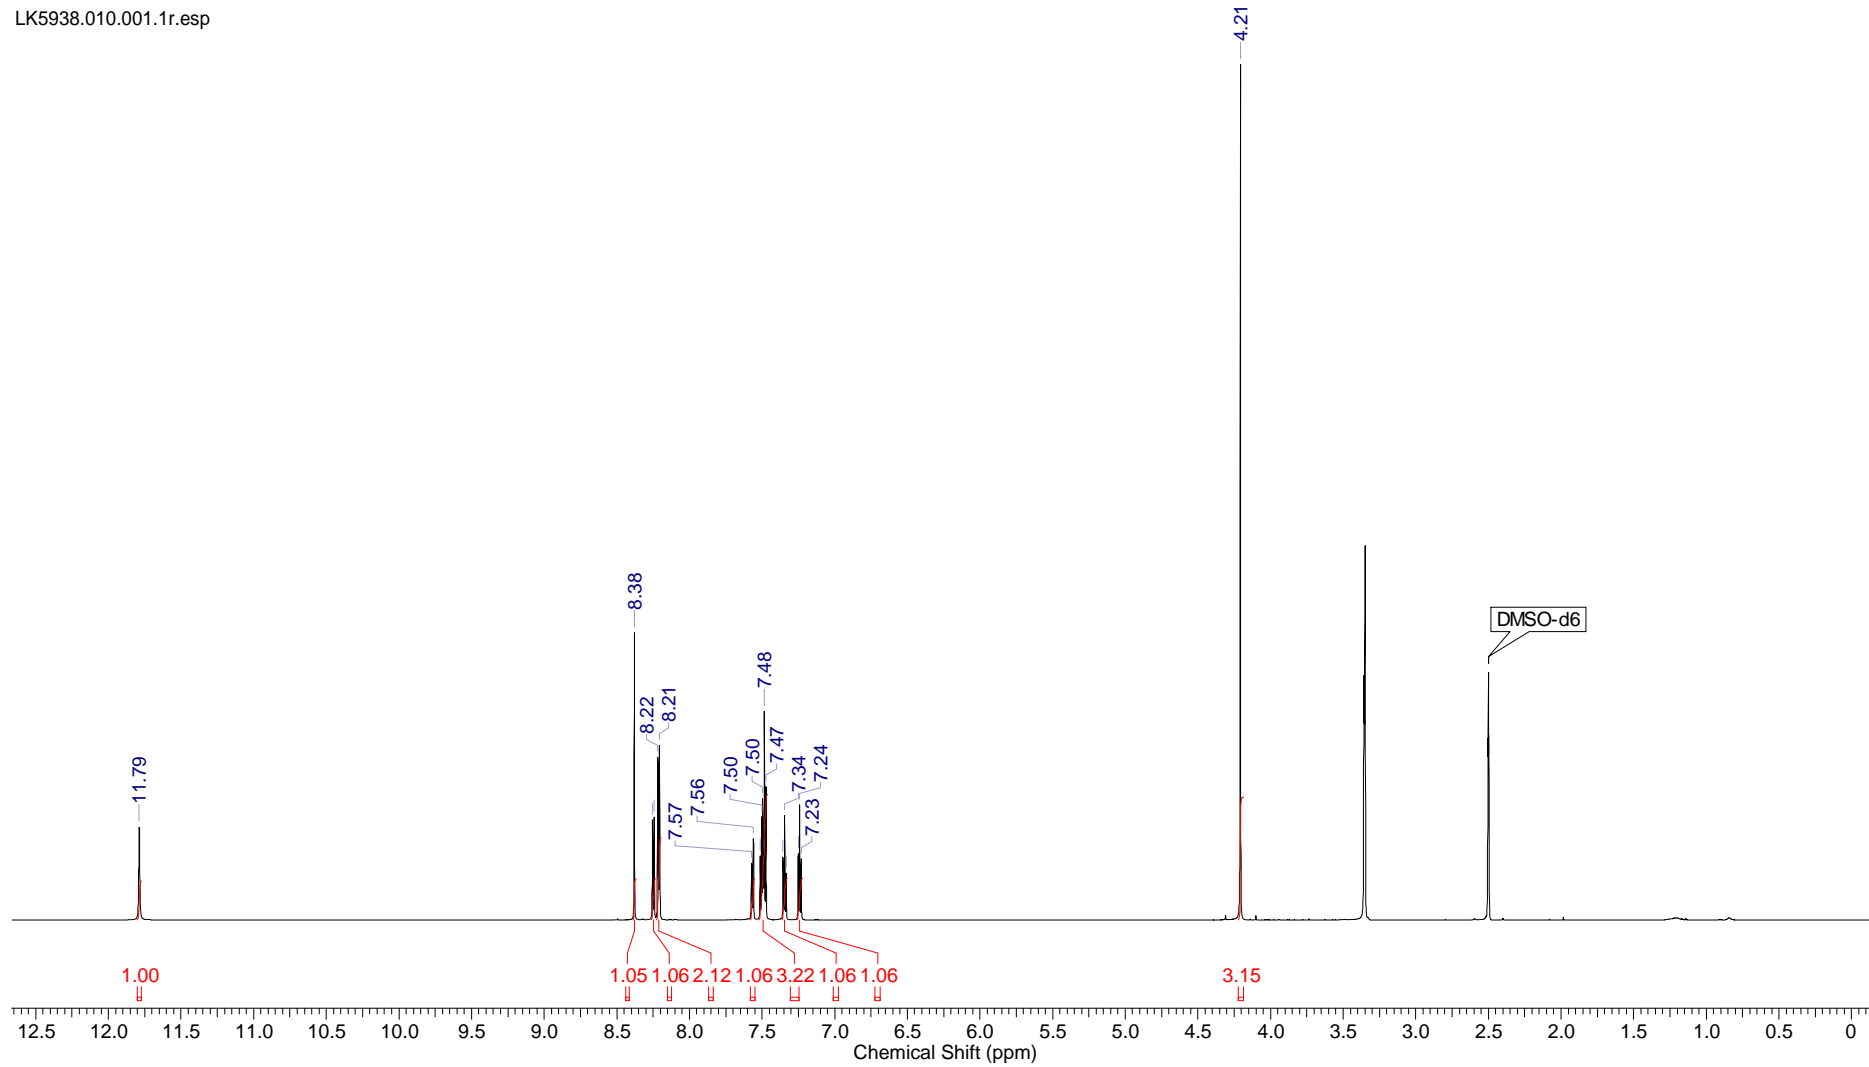

1-methoxy-3-phenyl-9H-pyrido[3,4-b]indole (**4b**)  $^{13}\text{C}$  {1H} NMR (177 MHz, DMSO- $d_6$ )

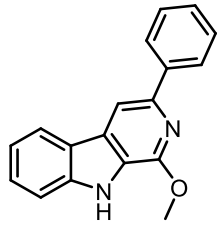

LK5938.011.001.1r.esp

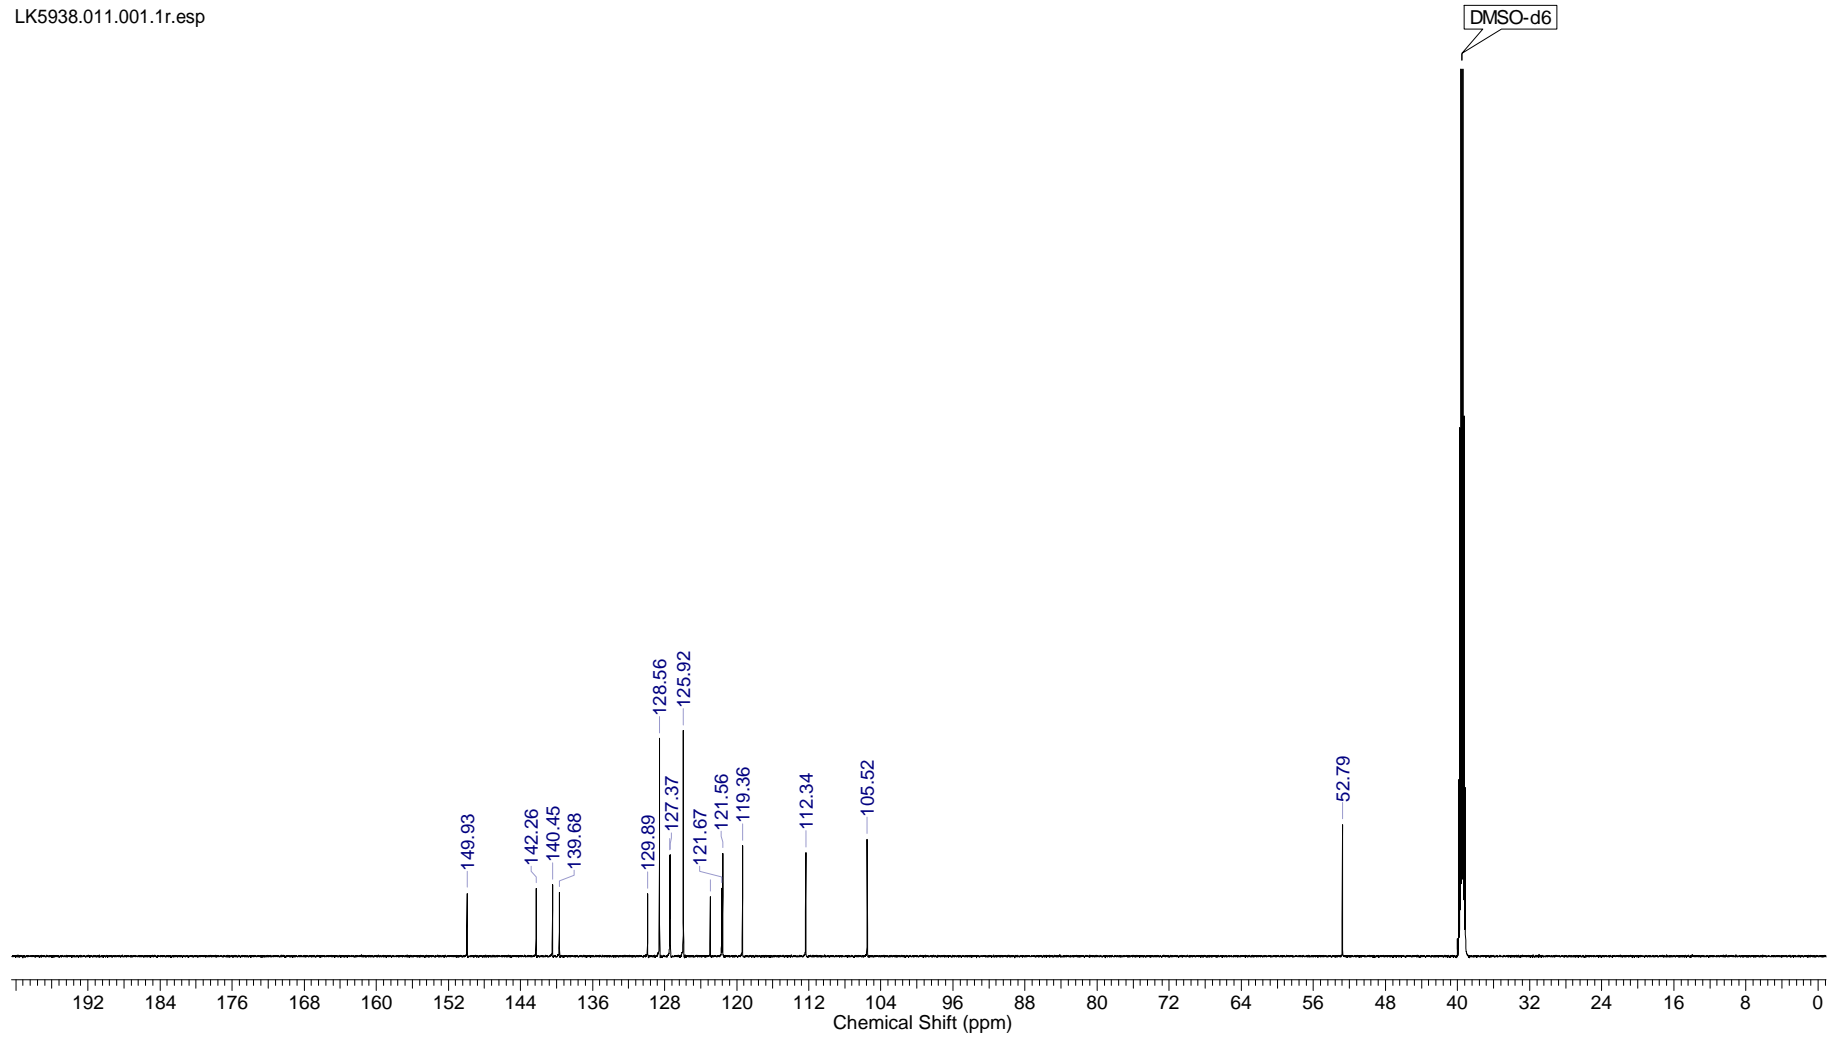

6-chloro-1-methoxy-3-phenyl-9H-pyrido[3,4-b]indole (**4c**)  $^1\text{H}$  NMR (700 MHz,  $\text{DMSO-d}_6$ )

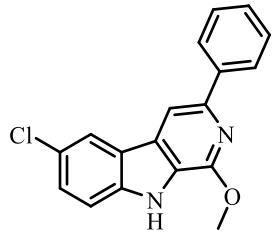

LK5956.010.001.1r.esp

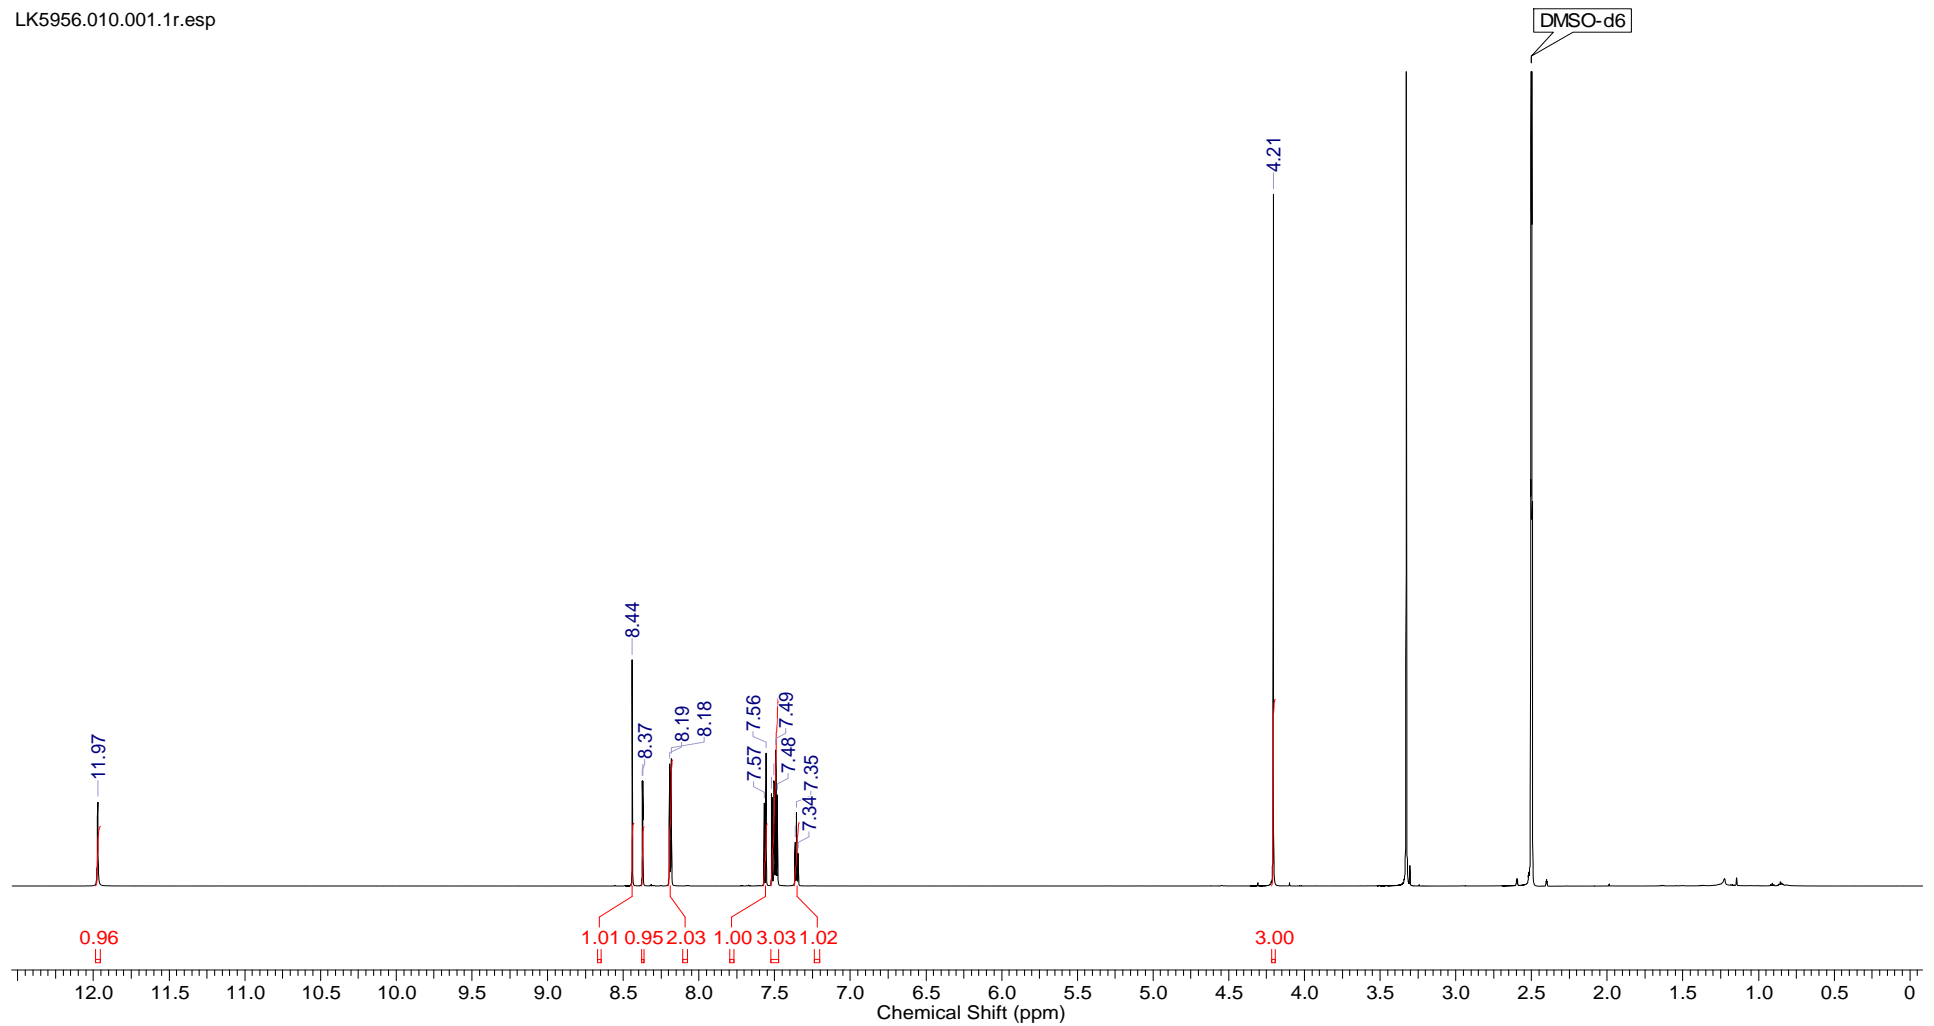

6-chloro-1-methoxy-3-phenyl-9H-pyrido[3,4-b]indole (**4c**)  $^{13}\text{C}$  {1H} NMR (177 MHz, DMSO- $d_6$ )

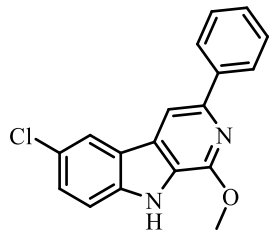

LK5956.011.001.1r.esp

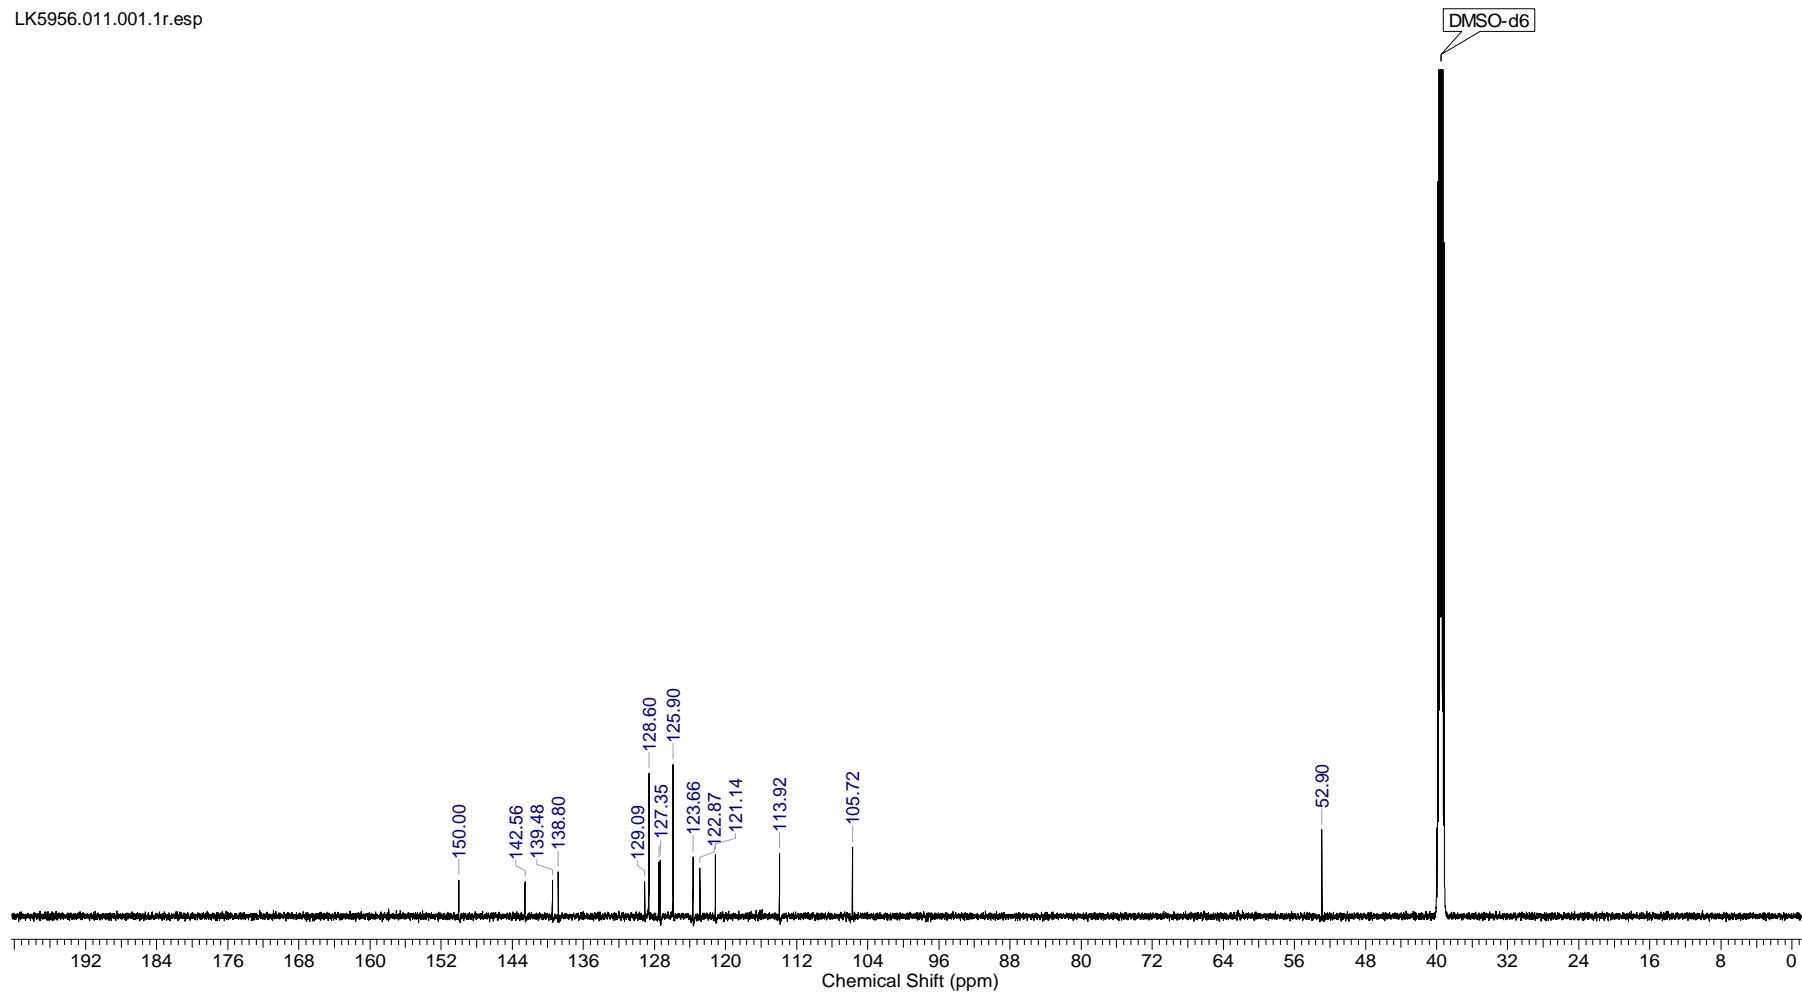

3-(4-fluorophenyl)-1-methoxy-9H-pyrido[3,4-b]indole (**4d**)  $^1\text{H}$  NMR (700 MHz,  $\text{DMSO-d}_6$ )

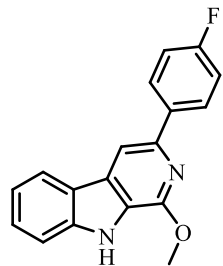

LK5957.010.001.1r.esp

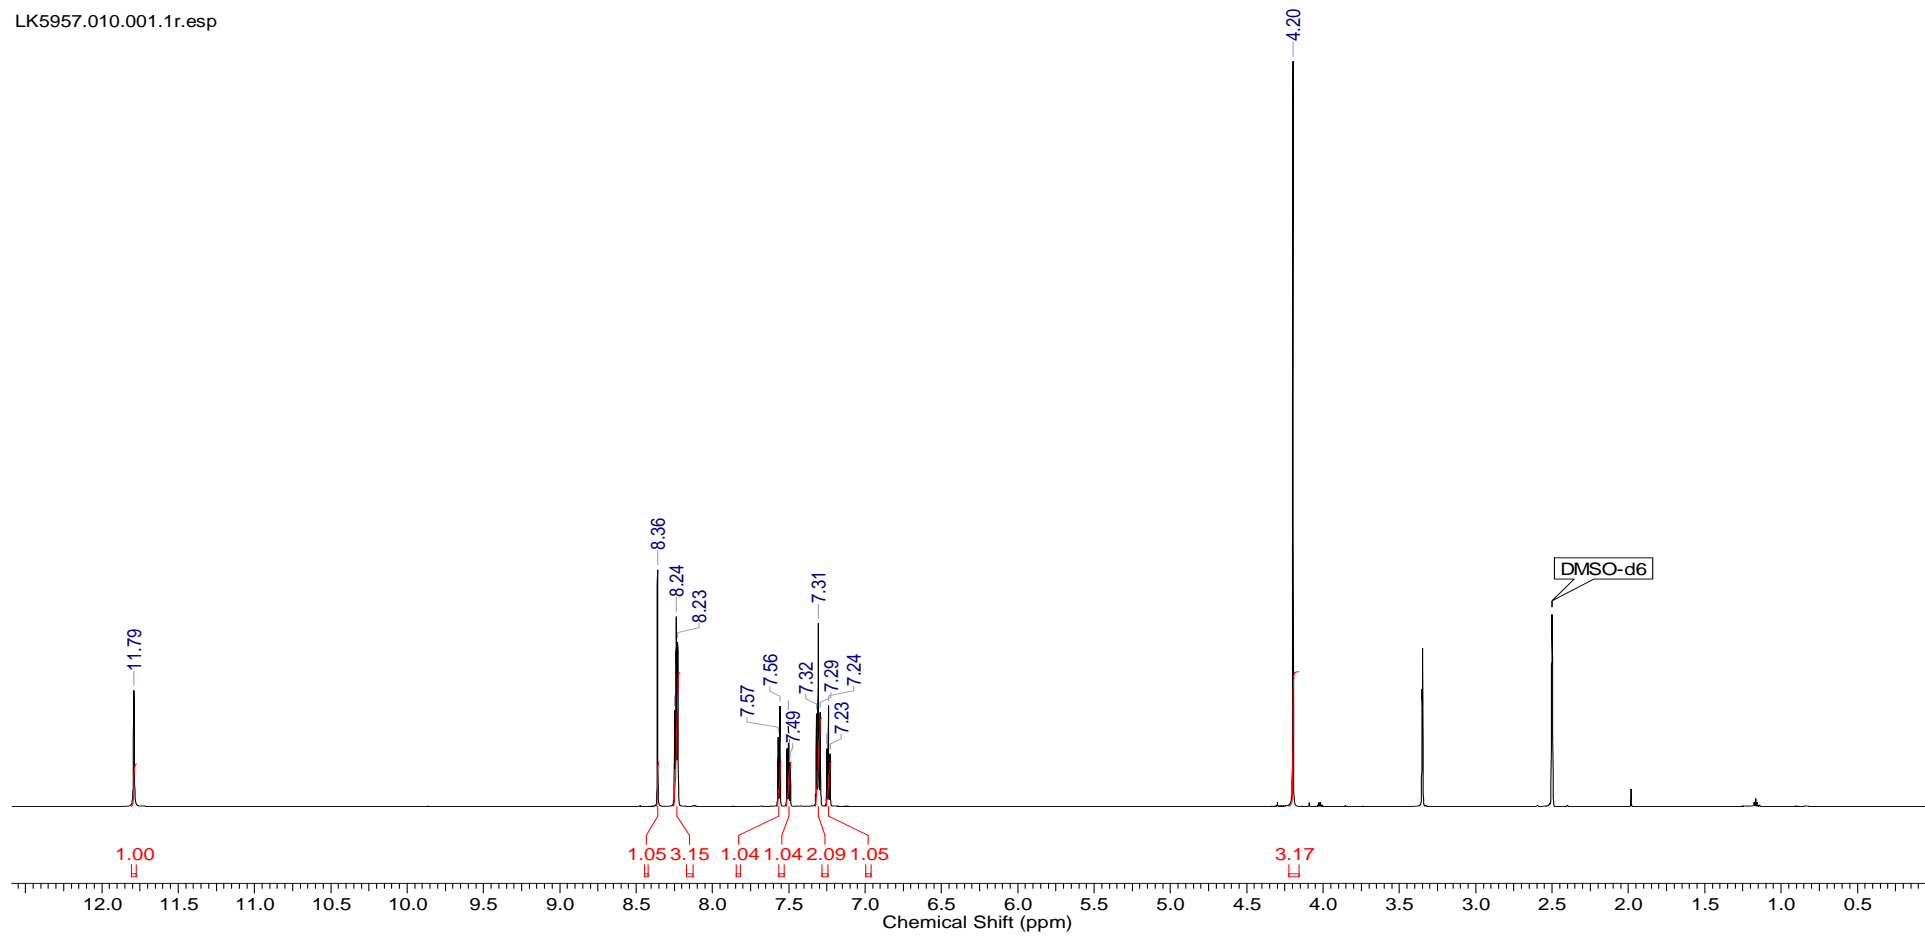



3-(4-fluorophenyl)-1-methoxy-9H-pyrido[3,4-b]indole (**4d**)  $^{13}\text{C}$  {1H} NMR (177 MHz, DMSO- $d_6$ )

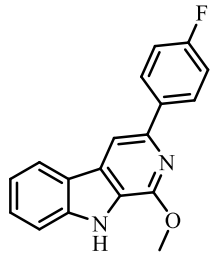

LK5957.011.001.1r.esp

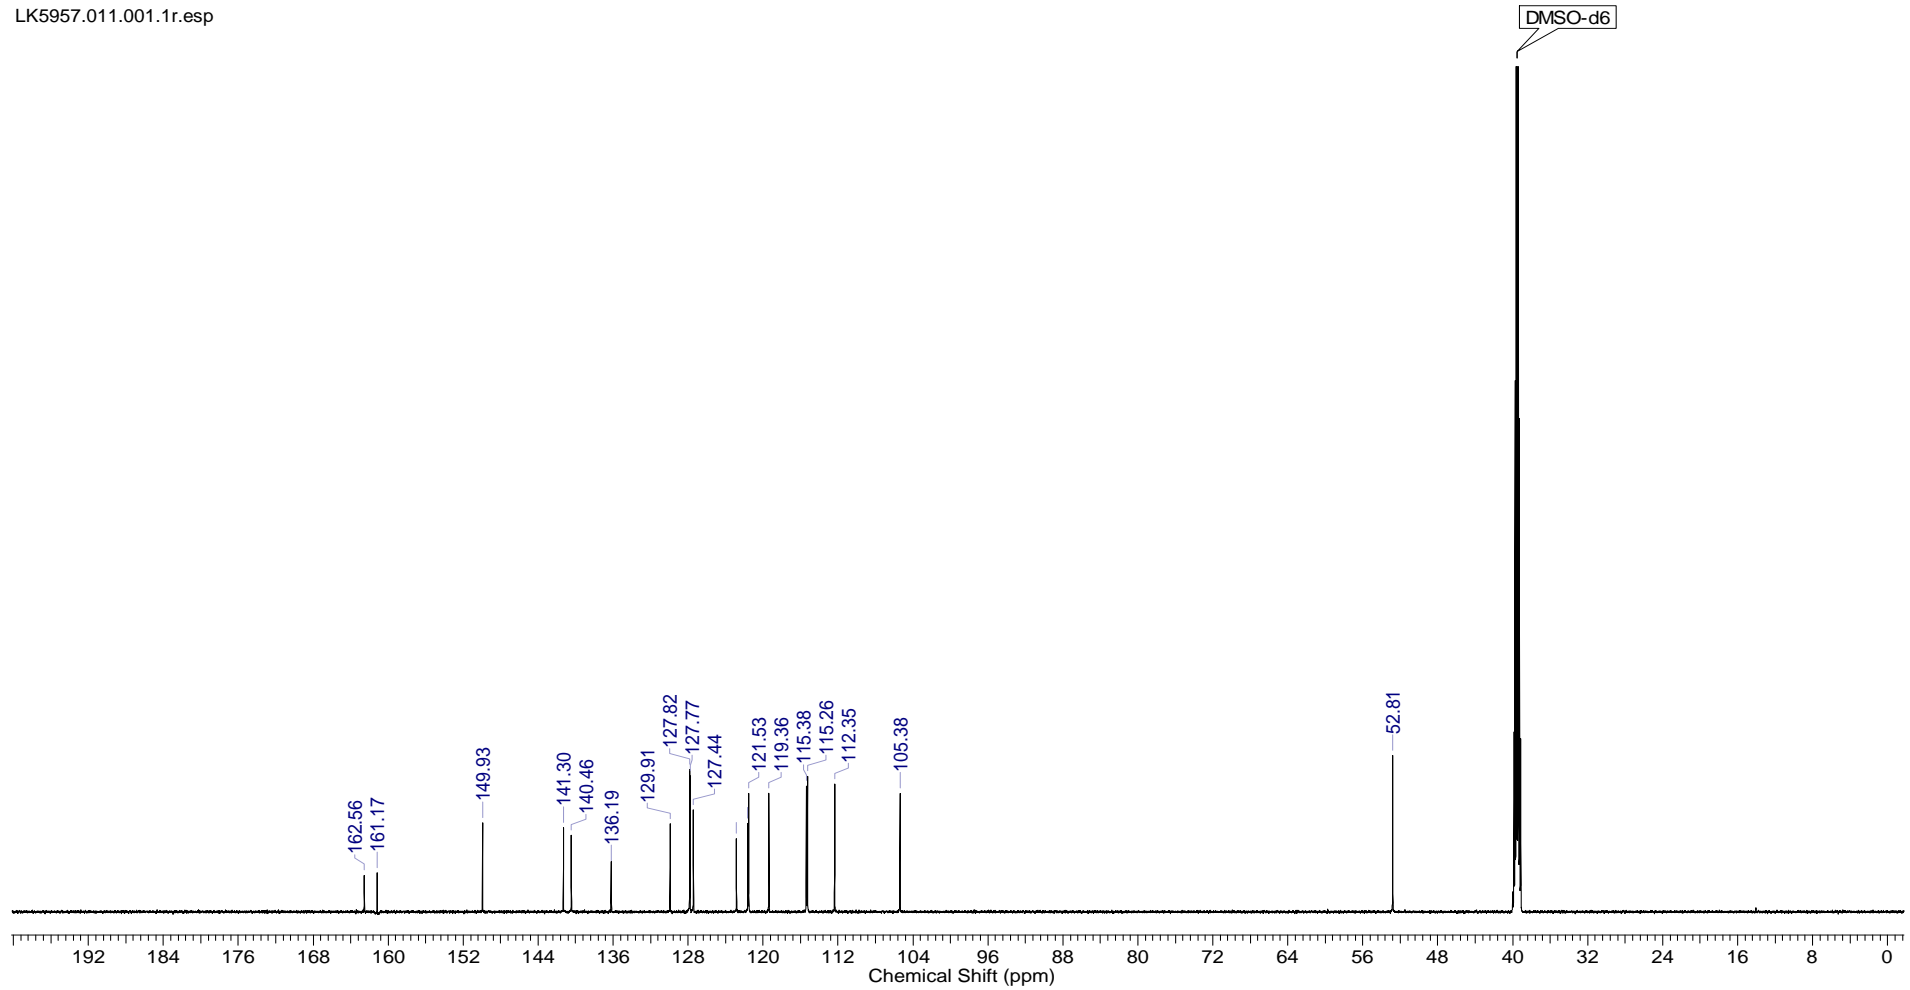

6-chloro-3-(4-fluorophenyl)-1-methoxy-9H-pyrido[3,4-b]indole (**4e**) <sup>1</sup>H NMR (700 MHz, DMSO-d<sub>6</sub>)

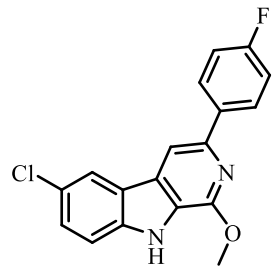

LK5959.010.001.1r.esp

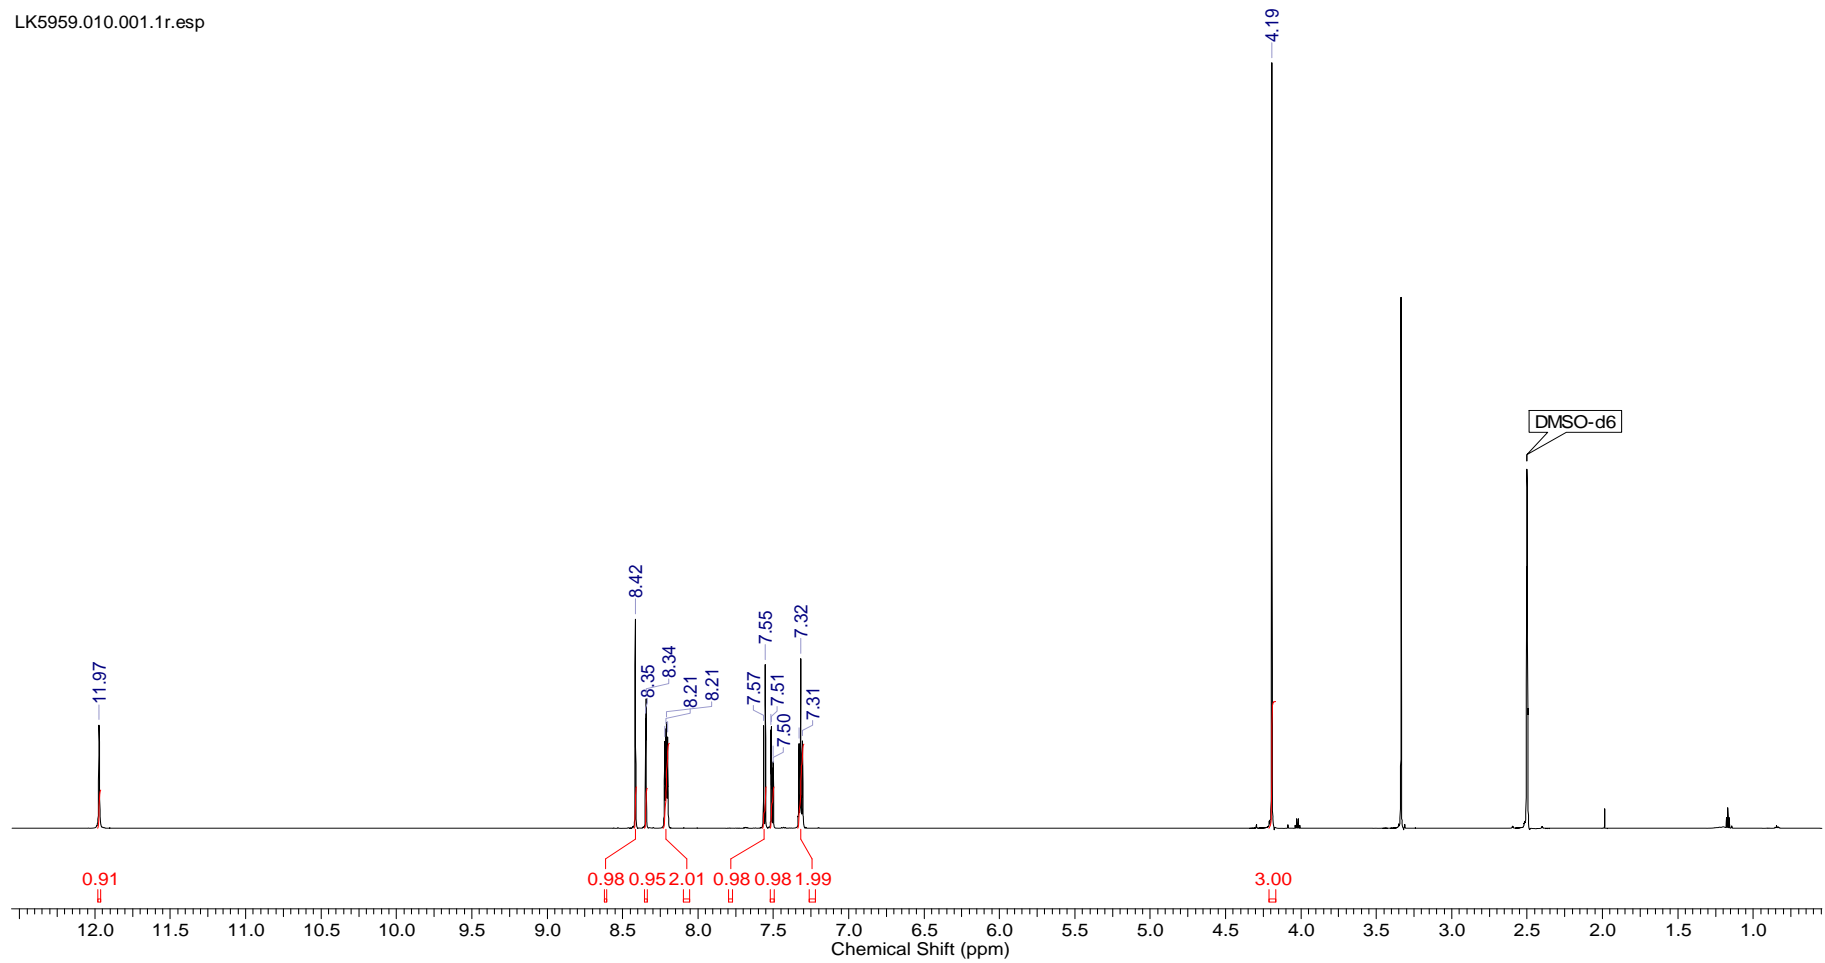

6-chloro-3-(4-fluorophenyl)-1-methoxy-9H-pyrido[3,4-b]indole (**4e**)  $^{13}\text{C}$  {1H} NMR (177 MHz, DMSO- $d_6$ )

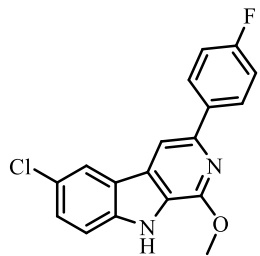

LK5959.011.001.1r.esp

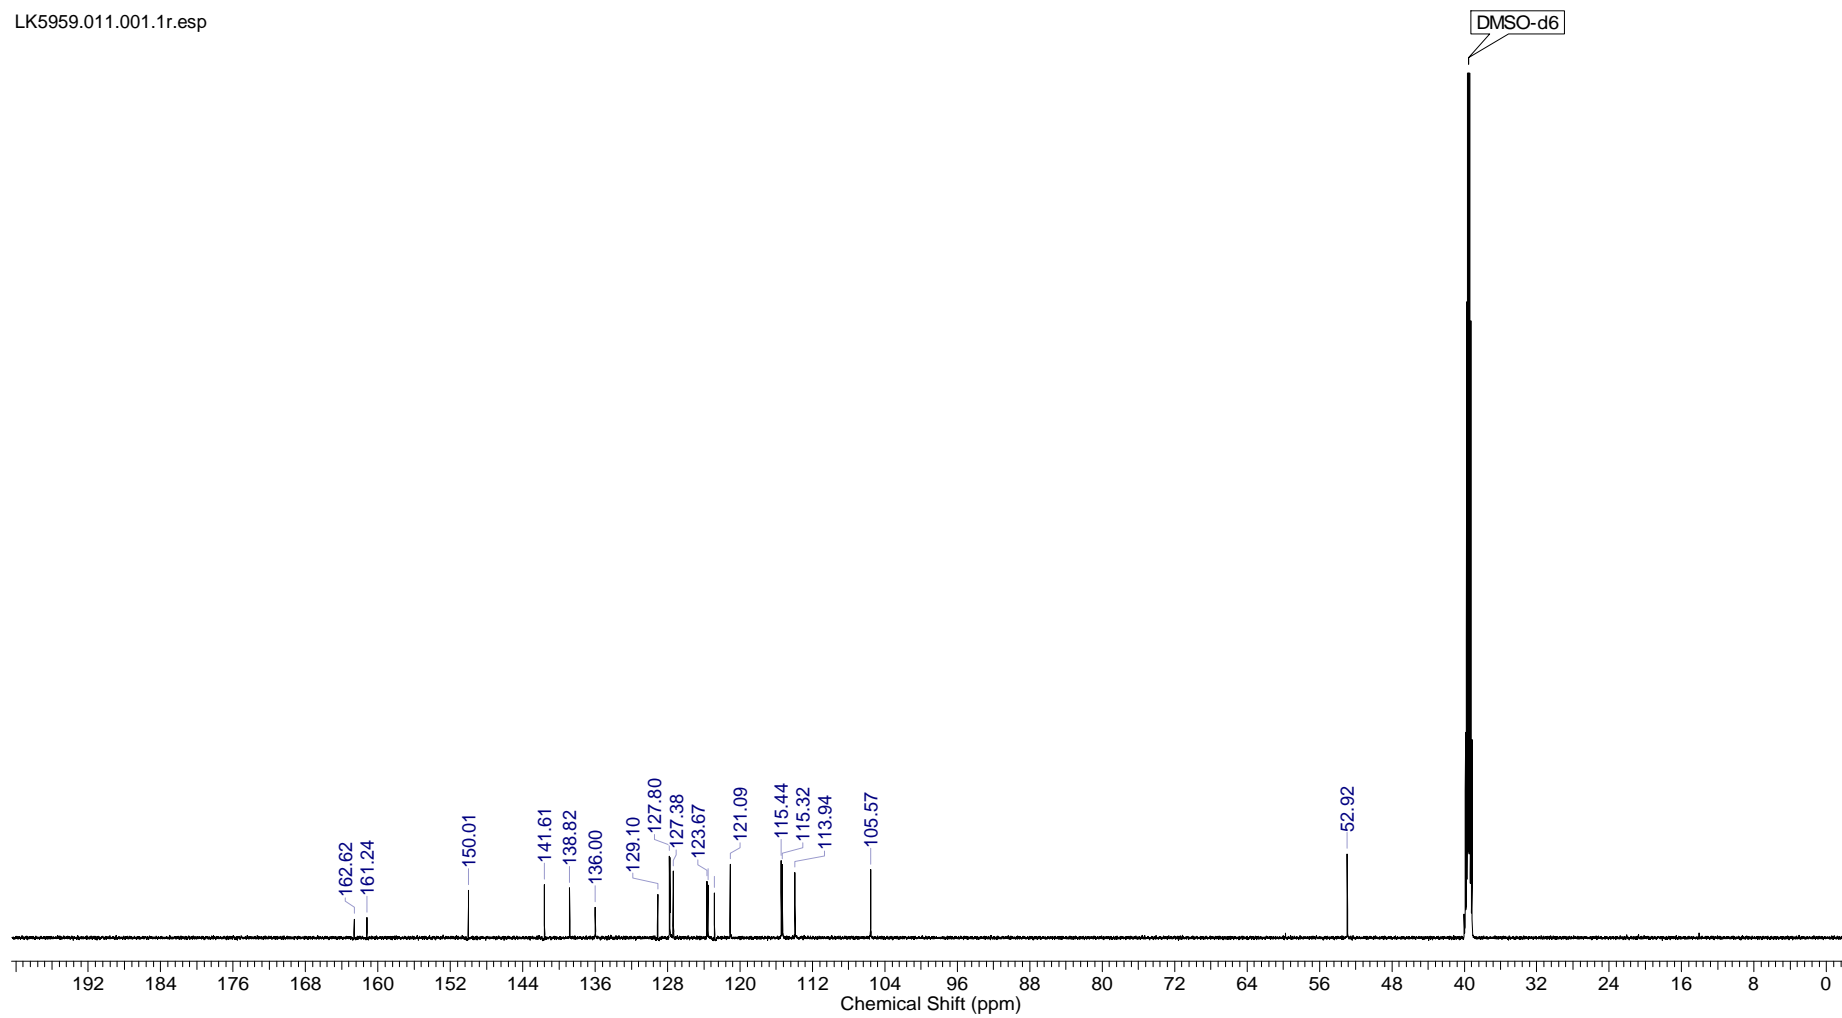

6-ethyl-3-(4-fluorophenyl)-1-methoxy-9H-pyrido[3,4-b]indole (**4f**) <sup>1</sup>H NMR (700 MHz, DMSO-d<sub>6</sub>)

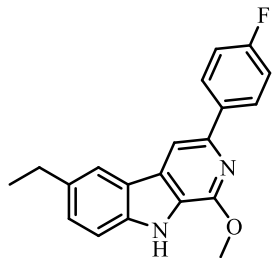

LK5958.022.001.1r.esp

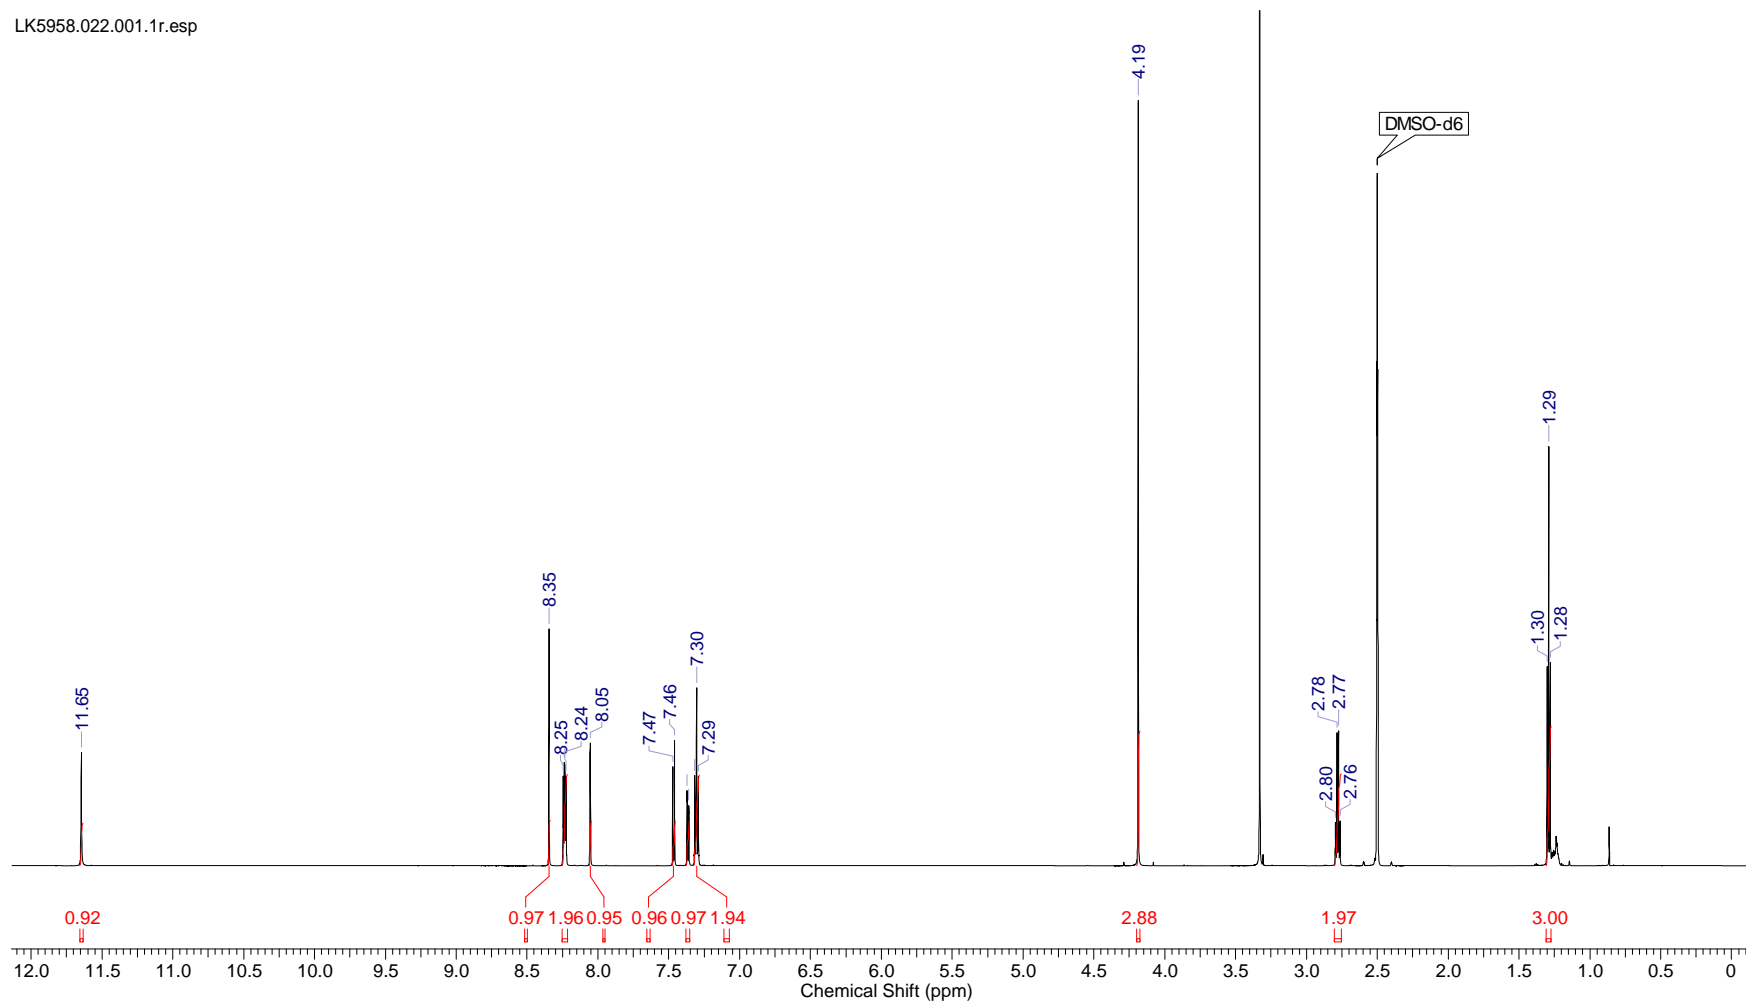

6-ethyl-3-(4-fluorophenyl)-1-methoxy-9H-pyrido[3,4-b]indole (**4f**)  $^{13}\text{C}$  { $^1\text{H}$ } NMR (177 MHz,  $\text{DMSO-}d_6$ )

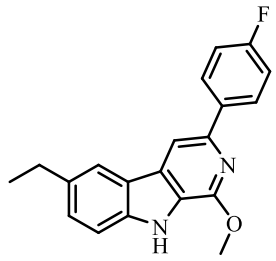

LK5958.023.001.1r.esp

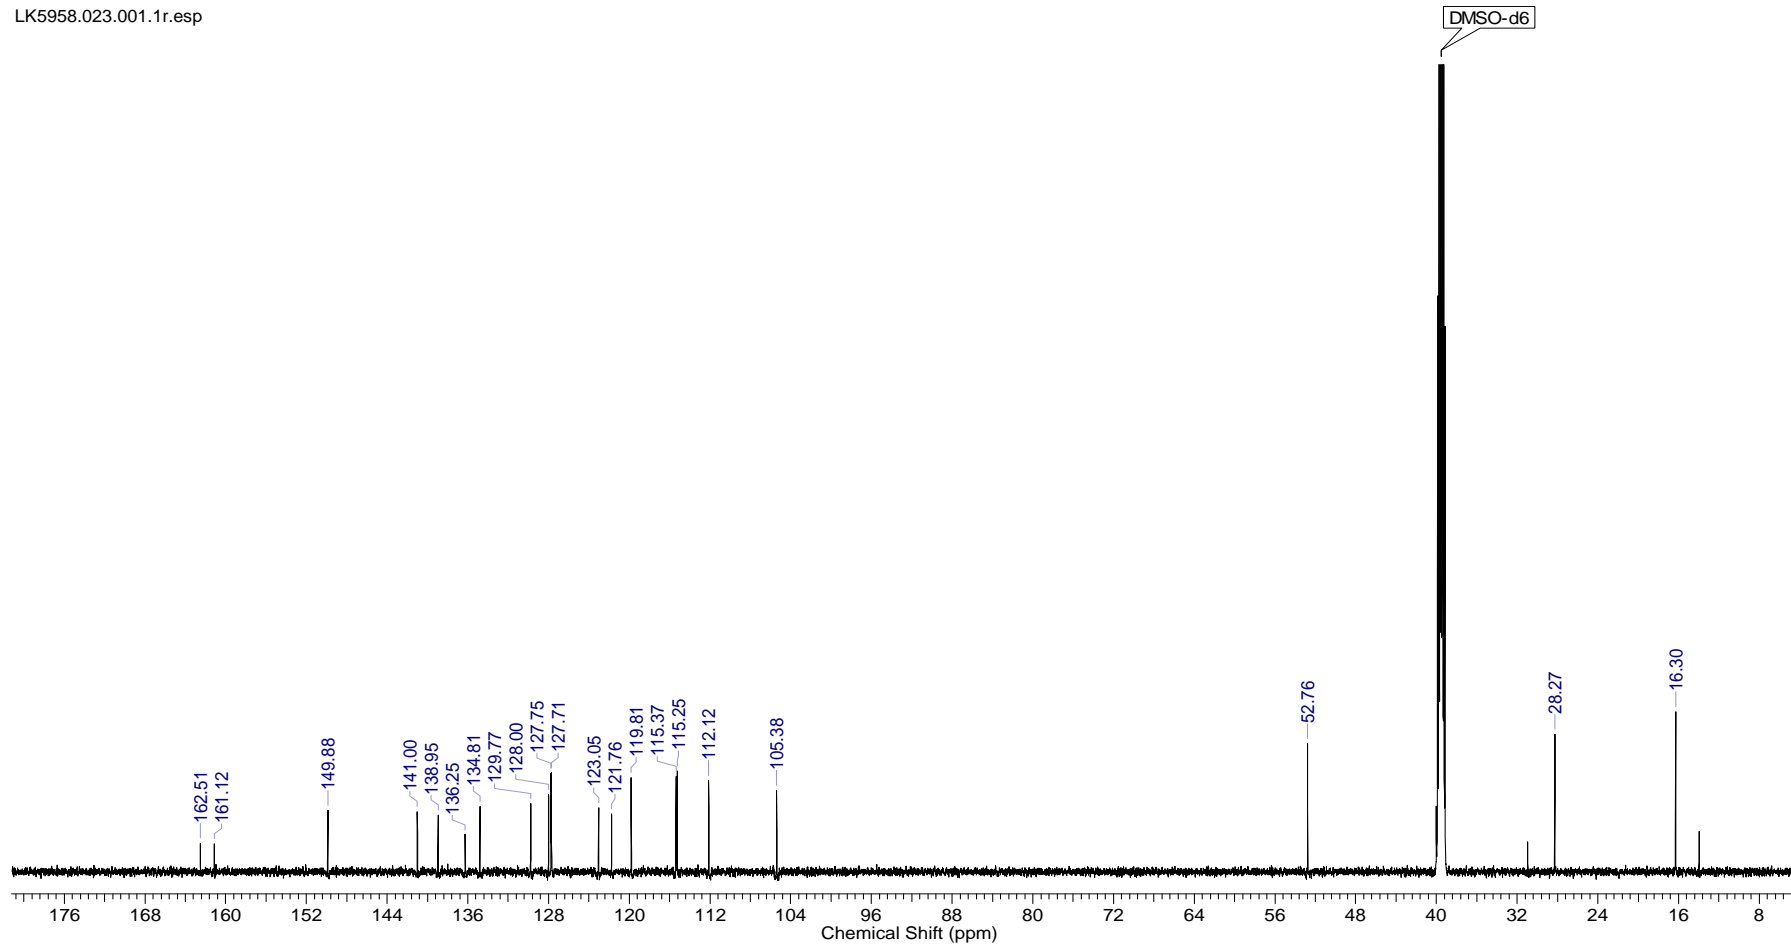

1-ethoxy-9H-pyrido[3,4-b]indole (**4g**)  $^1\text{H}$  NMR (700 MHz,  $\text{DMSO-d}_6$ )

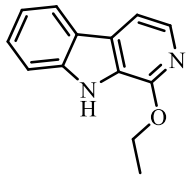

LK5966.010.001.1r.esp

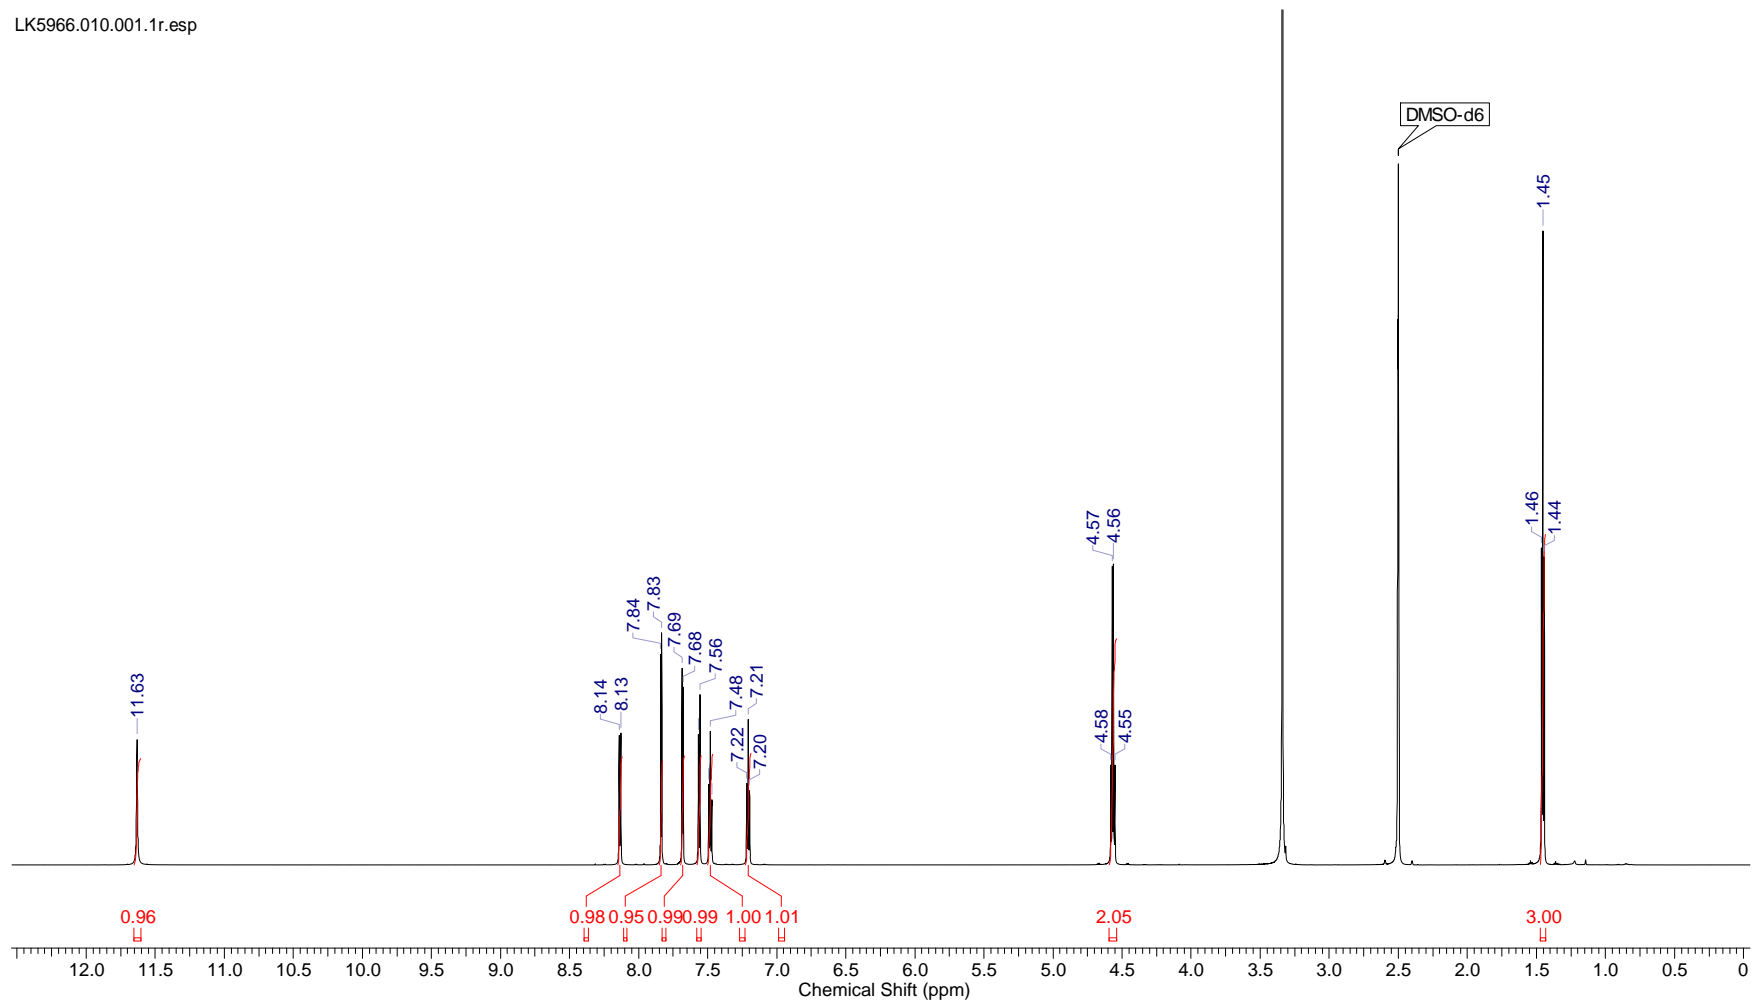

1-ethoxy-9H-pyrido[3,4-b]indole (**4g**)  $^{13}\text{C}$  {1H} NMR (177 MHz, DMSO- $d_6$ )

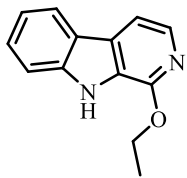

LK5966.011.001.1r.esp

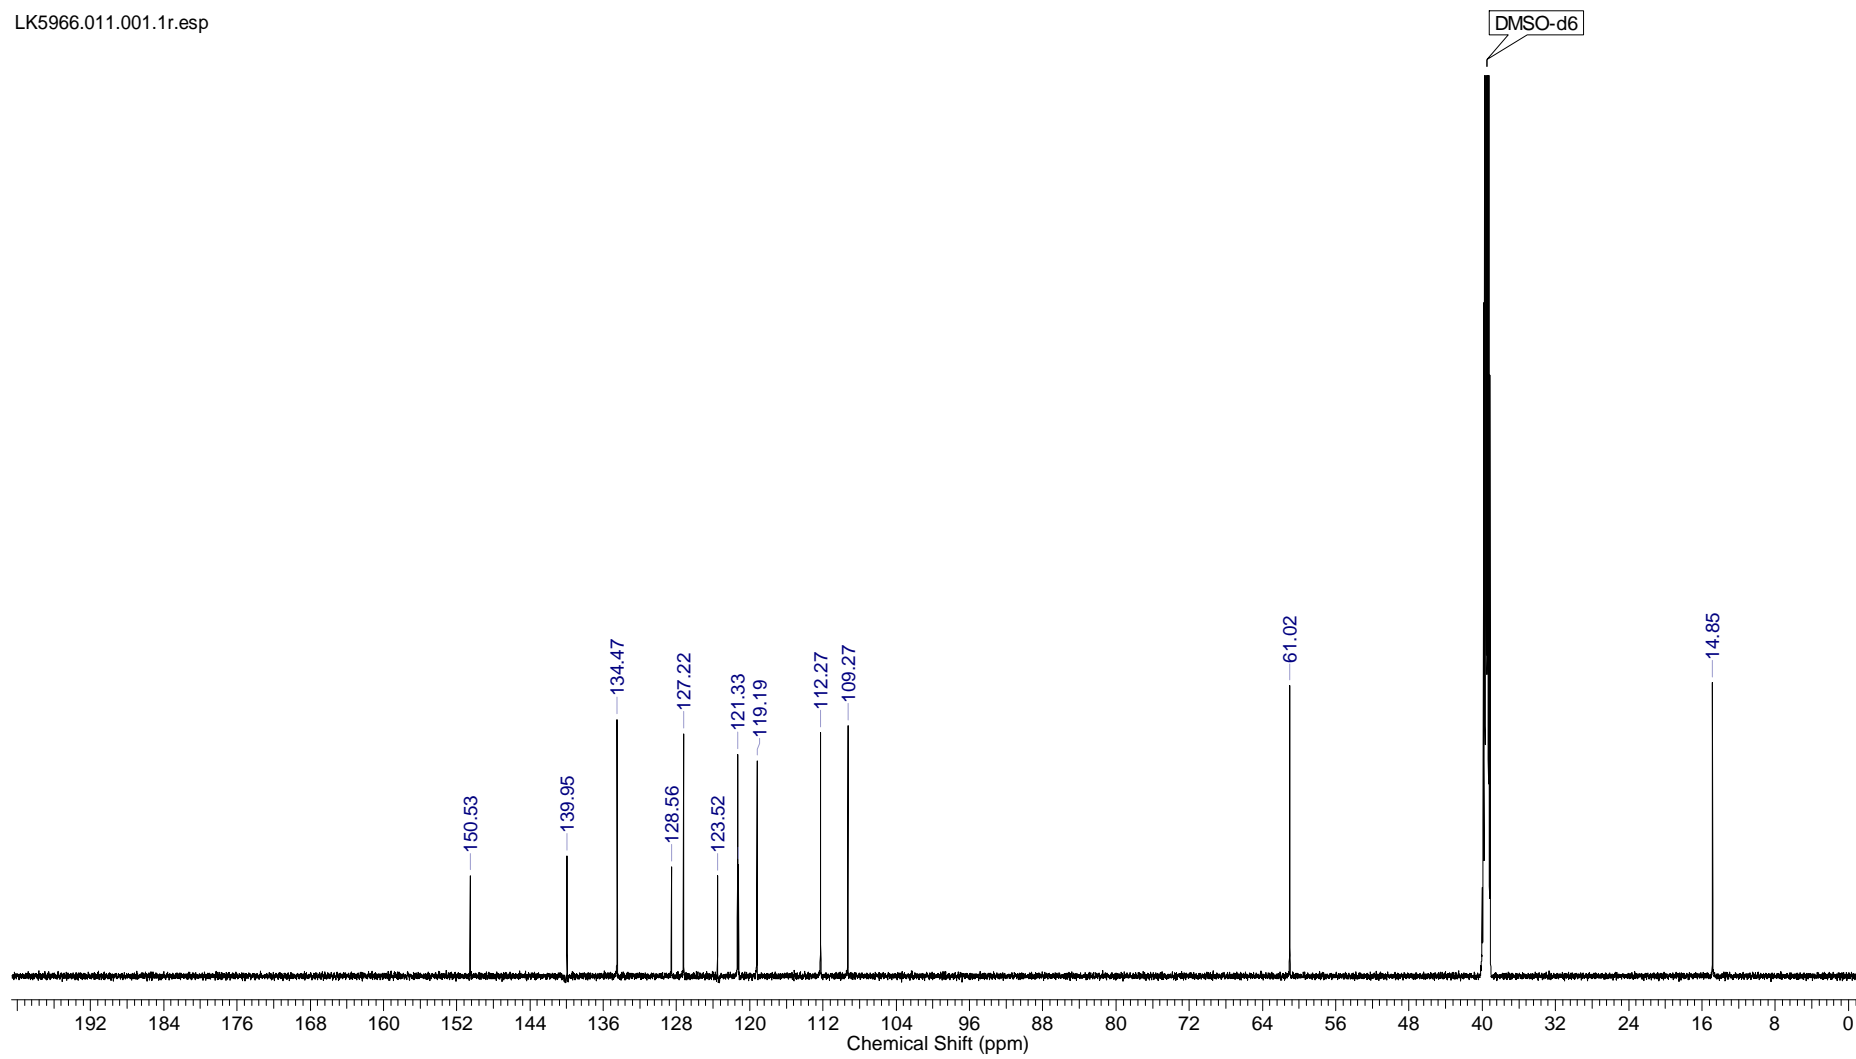

1-ethoxy-3-phenyl-9H-pyrido[3,4-b]indole (**4h**) <sup>1</sup>H NMR (700 MHz, DMSO-d<sub>6</sub>)

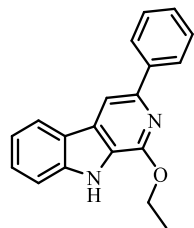

LK5950.010.001.1r.esp

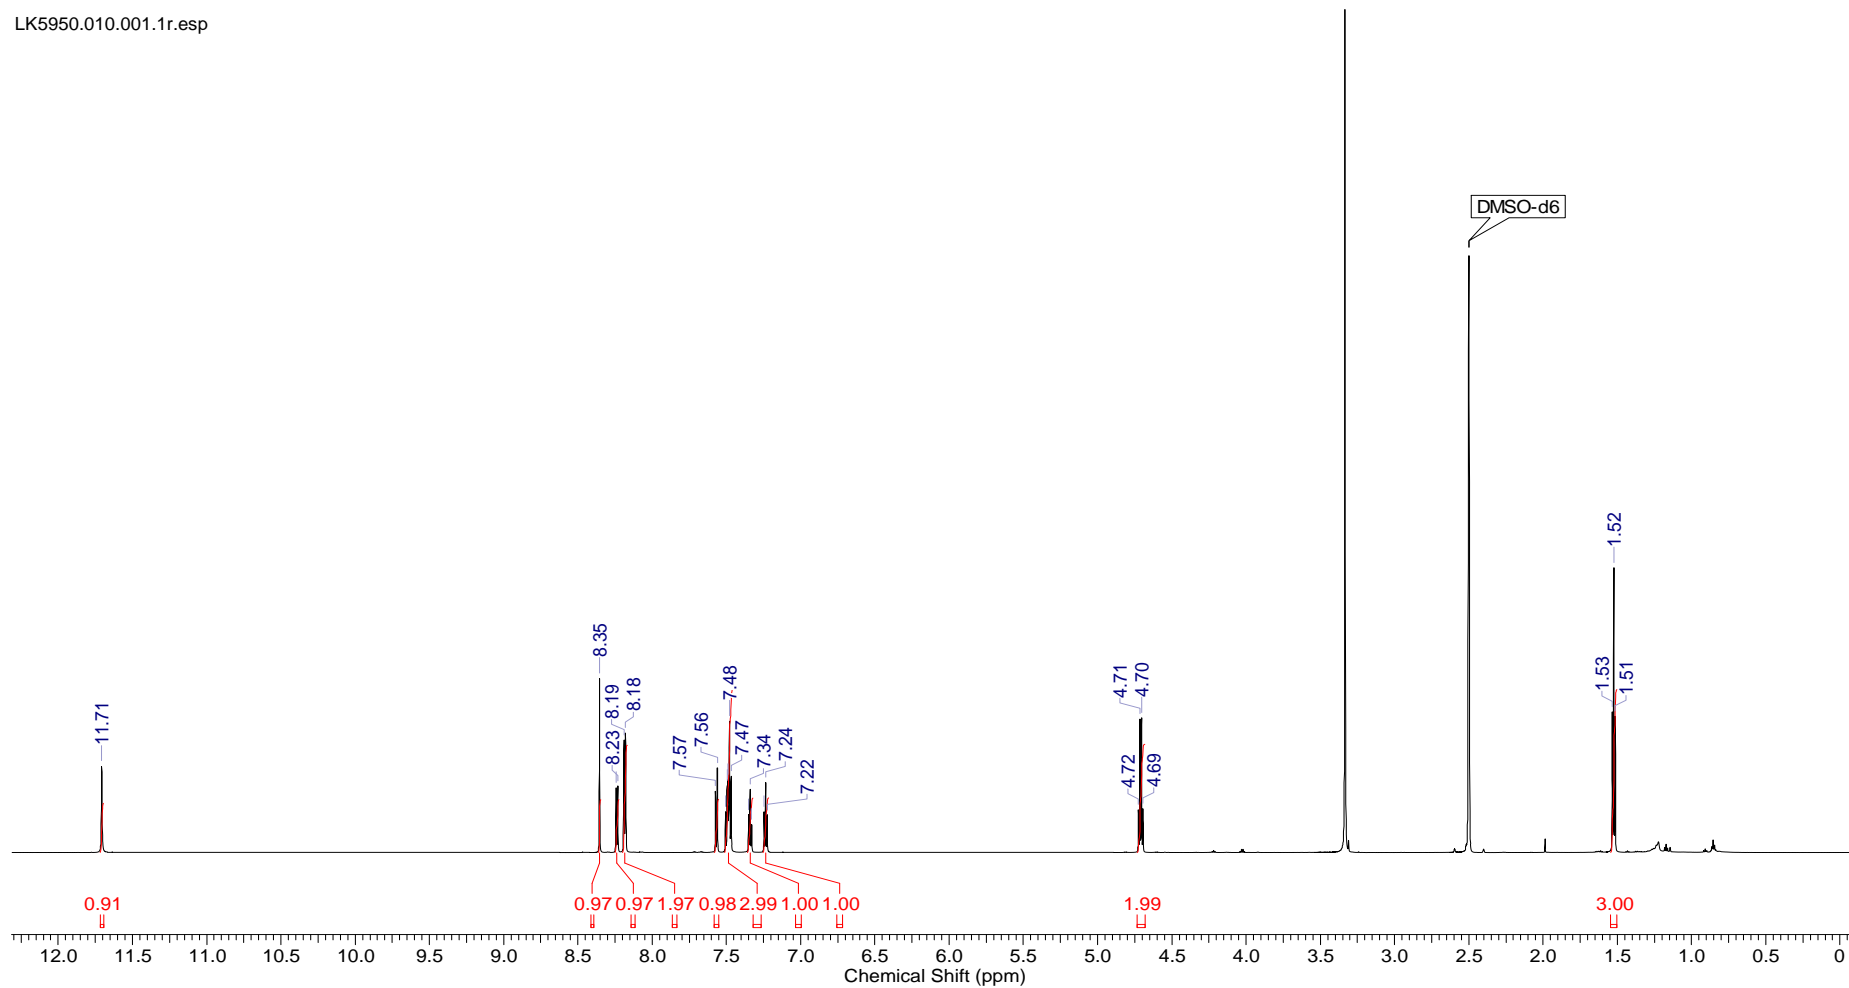



1-ethoxy-3-phenyl-9H-pyrido[3,4-b]indole (**4h**)  $^{13}\text{C}$  {1H} NMR (177 MHz, DMSO- $d_6$ )

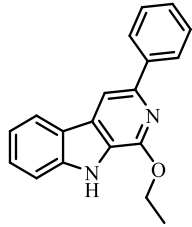

LK5950.011.001.1r.esp

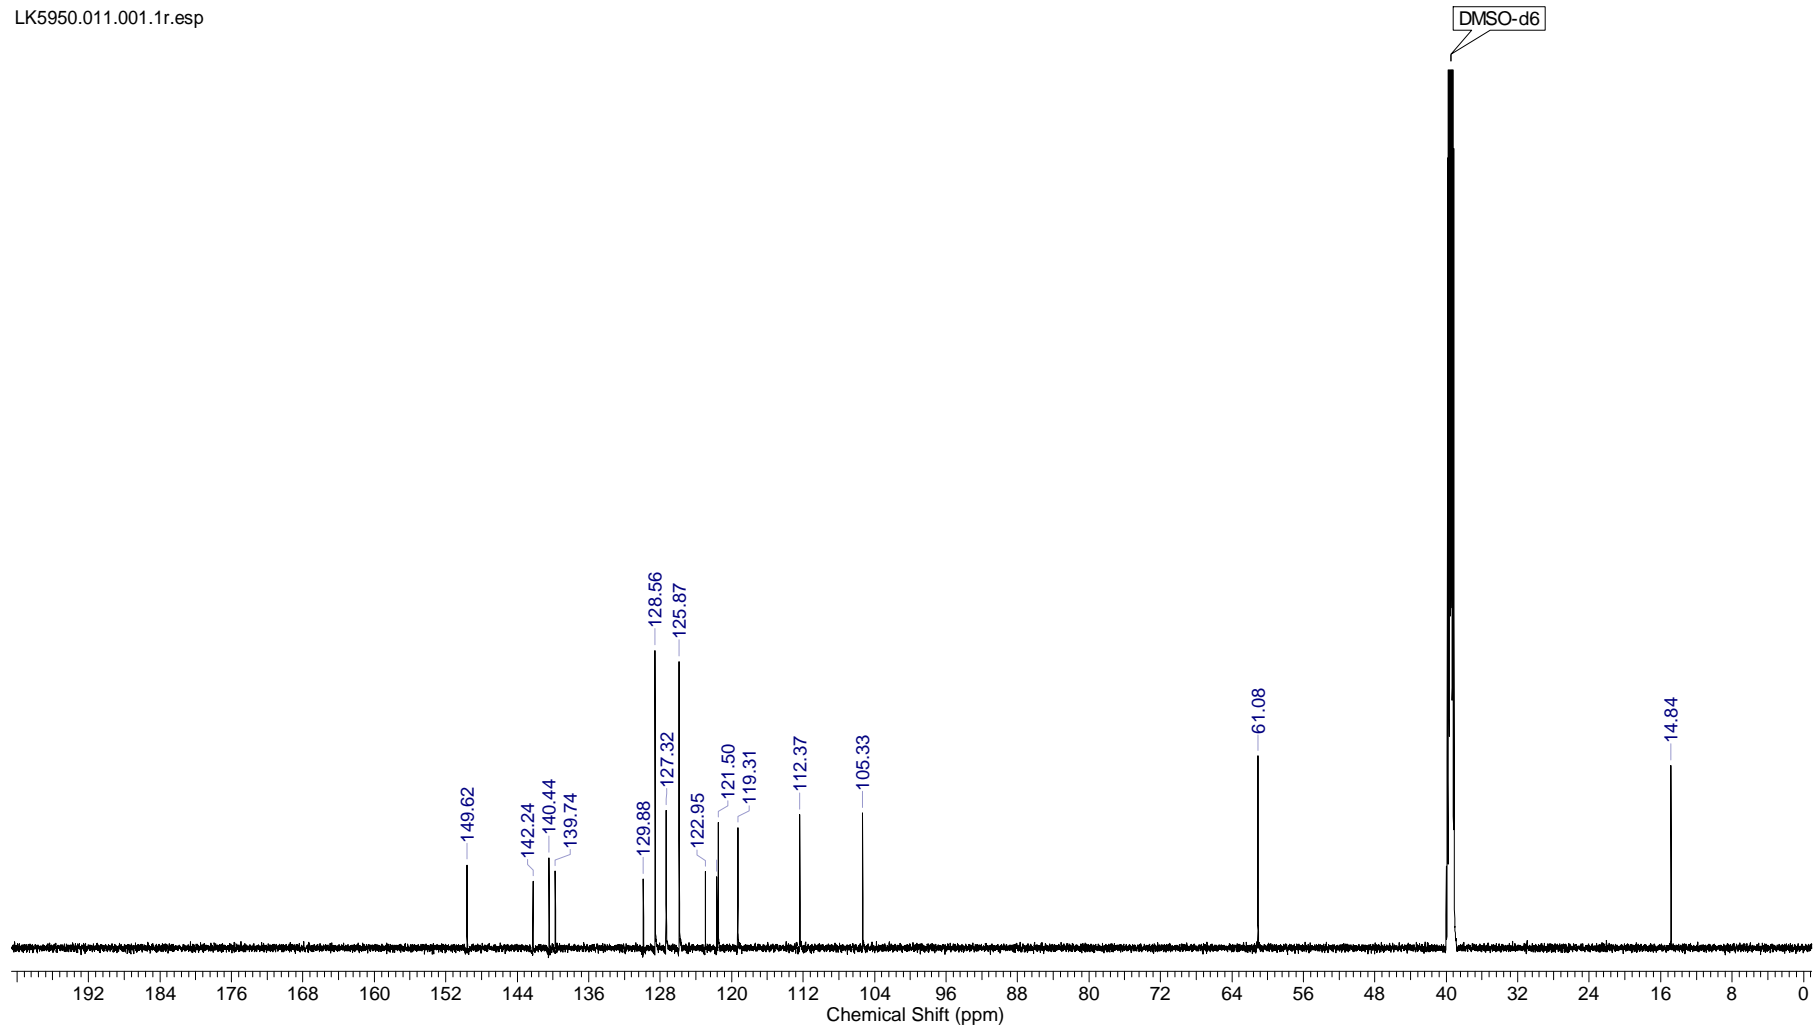

6-chloro-1-ethoxy-3-phenyl-9H-pyrido[3,4-b]indole (**4i**) <sup>1</sup>H NMR (700 MHz, DMSO-d<sub>6</sub>)

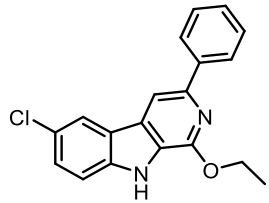

LK5975.010.001.1r.esp

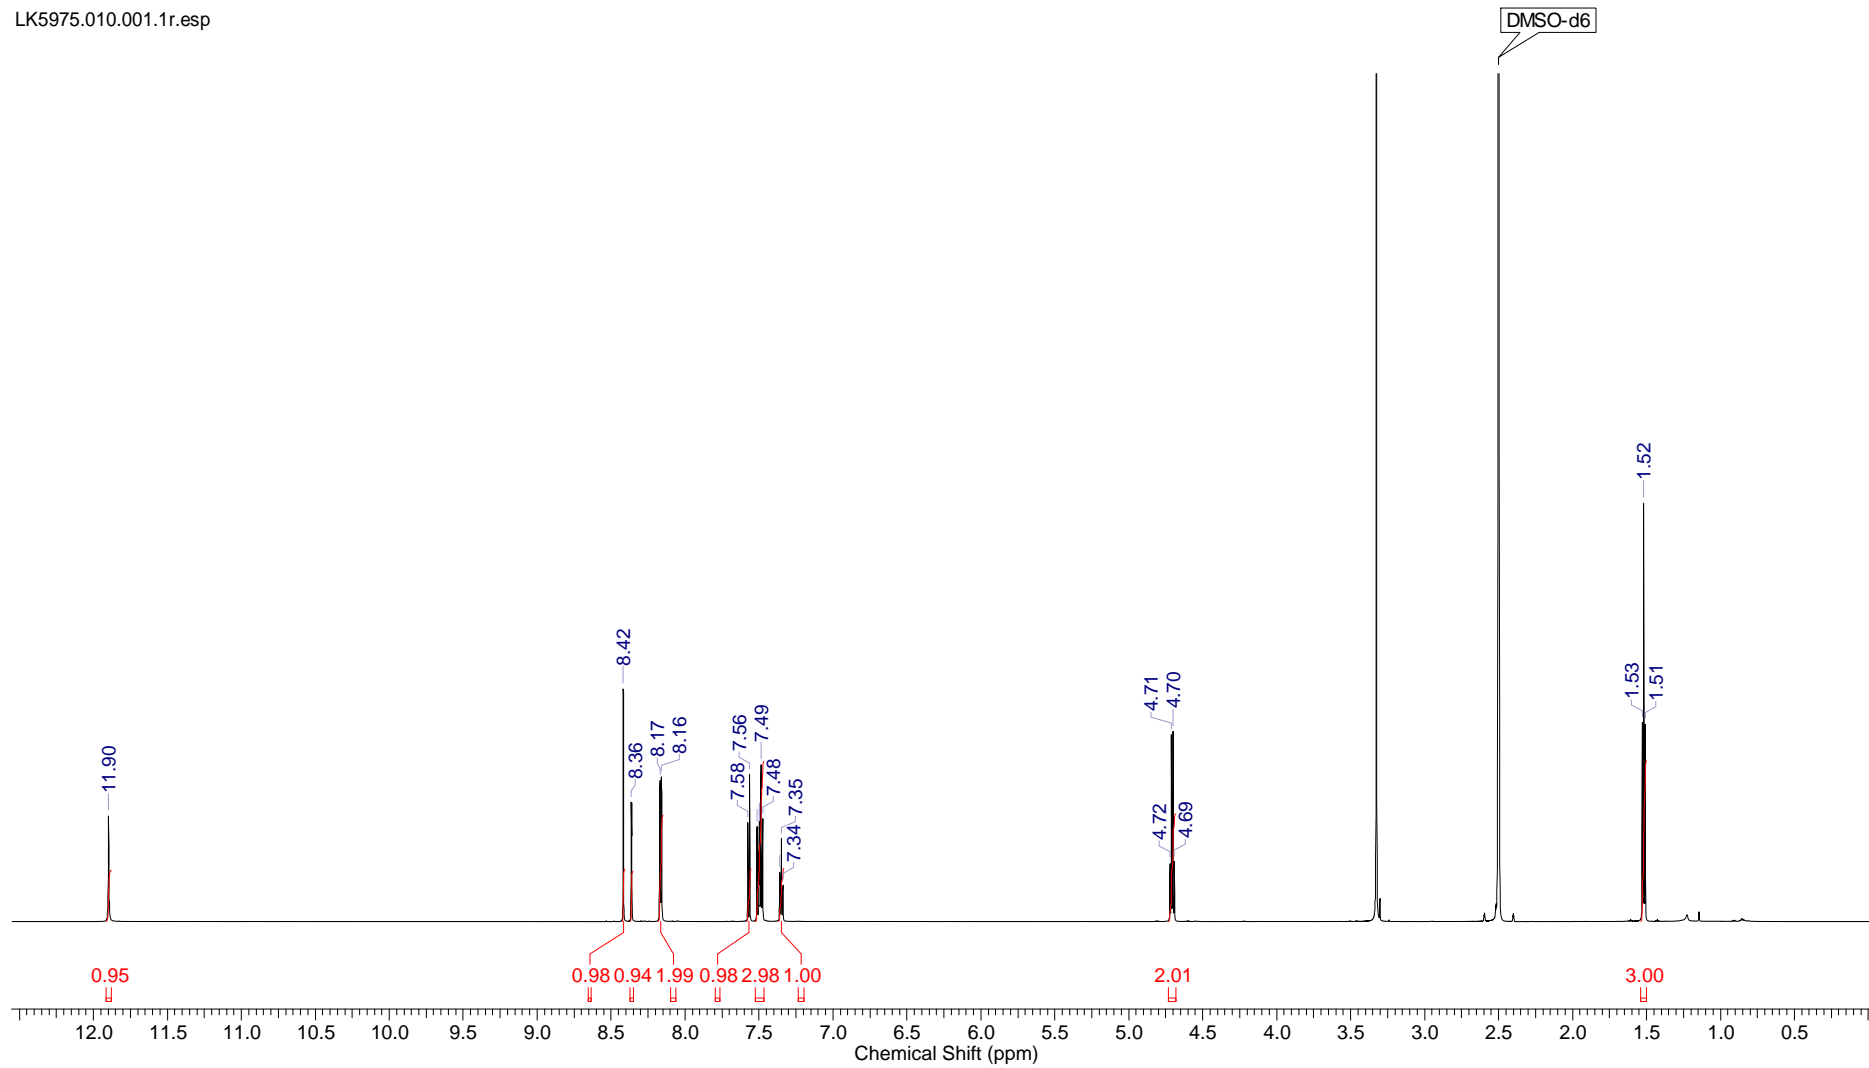

6-chloro-1-ethoxy-3-phenyl-9H-pyrido[3,4-b]indole (**4i**)  $^{13}\text{C}$  {1H} NMR (177 MHz, DMSO- $d_6$ )

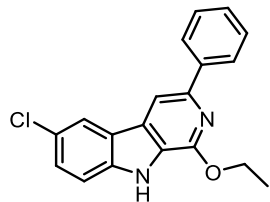

LK5975.011.001.1r.esp

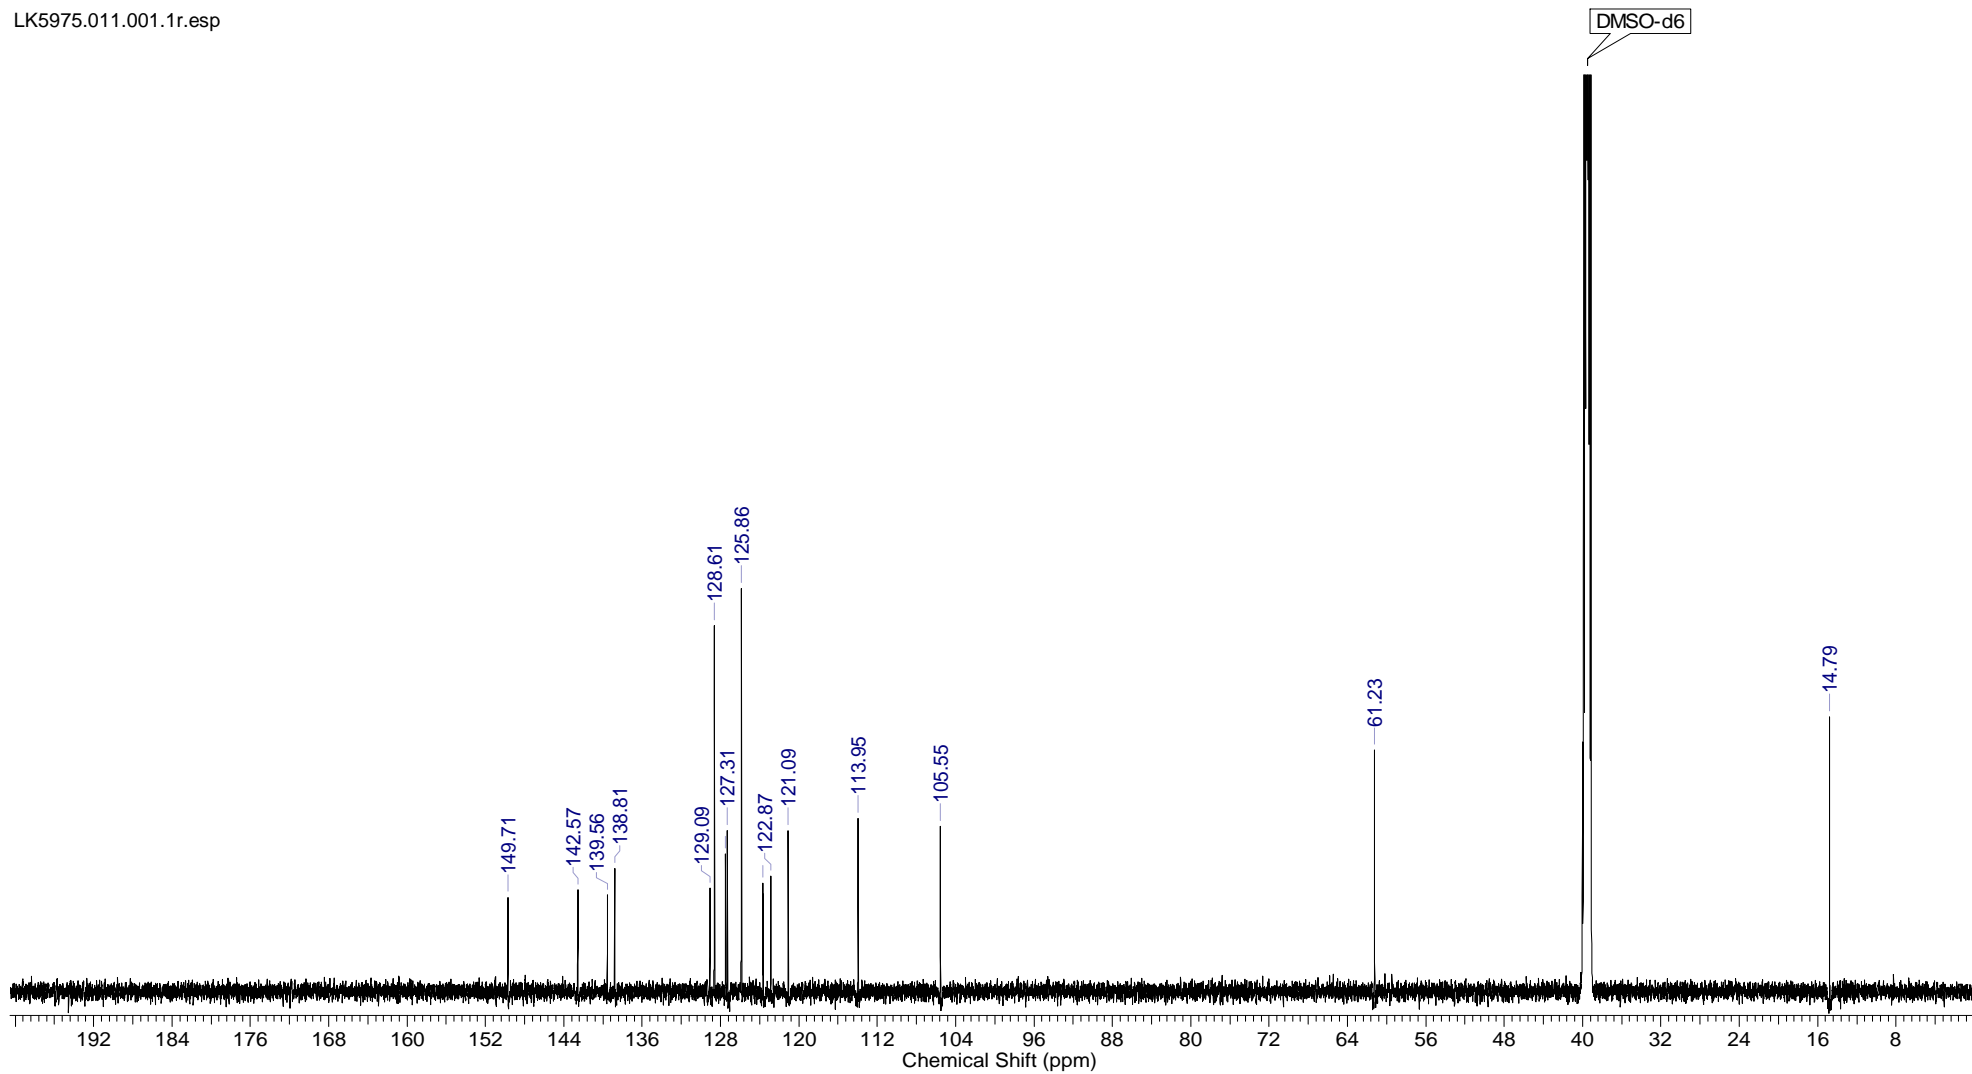

1-ethoxy-3-(4-fluorophenyl)-9H-pyrido[3,4-b]indole (**4j**) <sup>1</sup>H NMR (700 MHz, DMSO-d<sub>6</sub>)

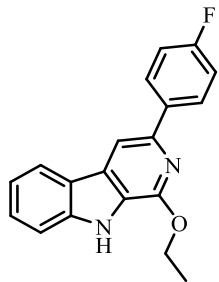

LK5972.010.001.1r.esp

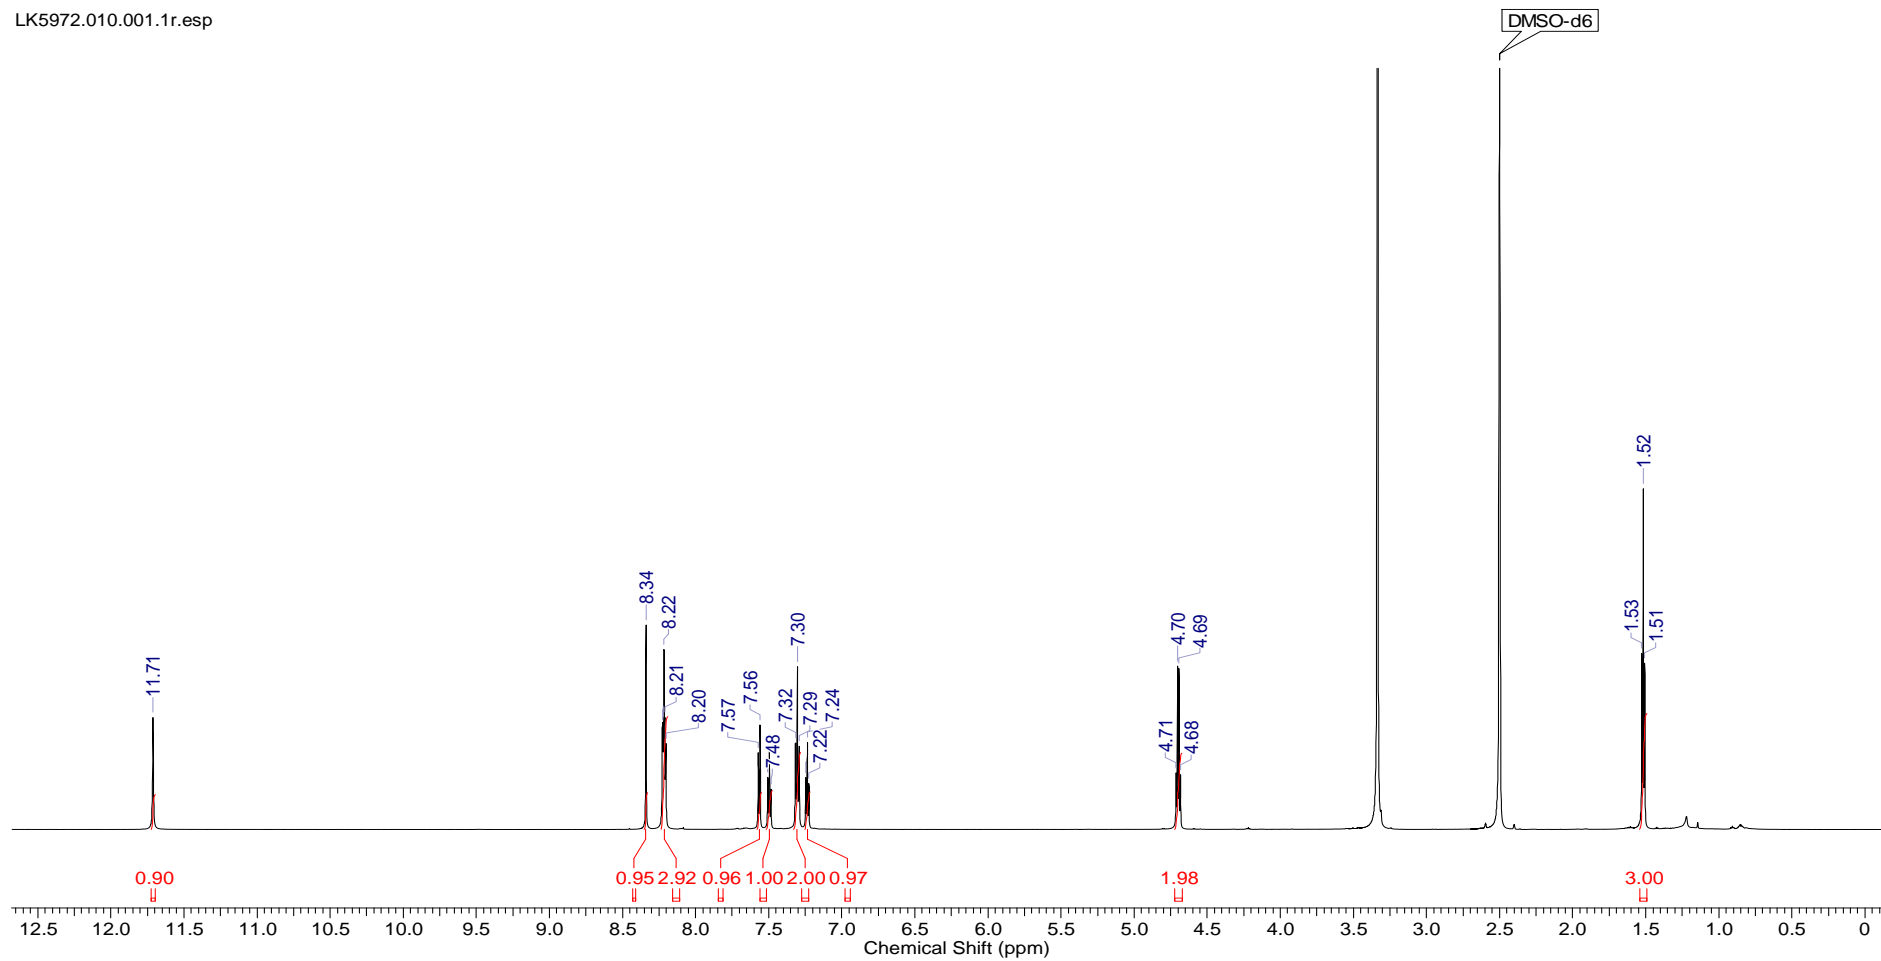

1-ethoxy-3-(4-fluorophenyl)-9H-pyrido[3,4-b]indole (4j) <sup>13</sup>C {1H} NMR (177 MHz, DMSO-d<sub>6</sub>)

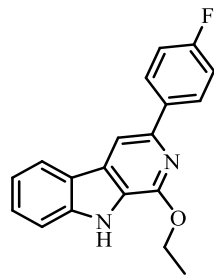

LK5972.011.001.1r.esp

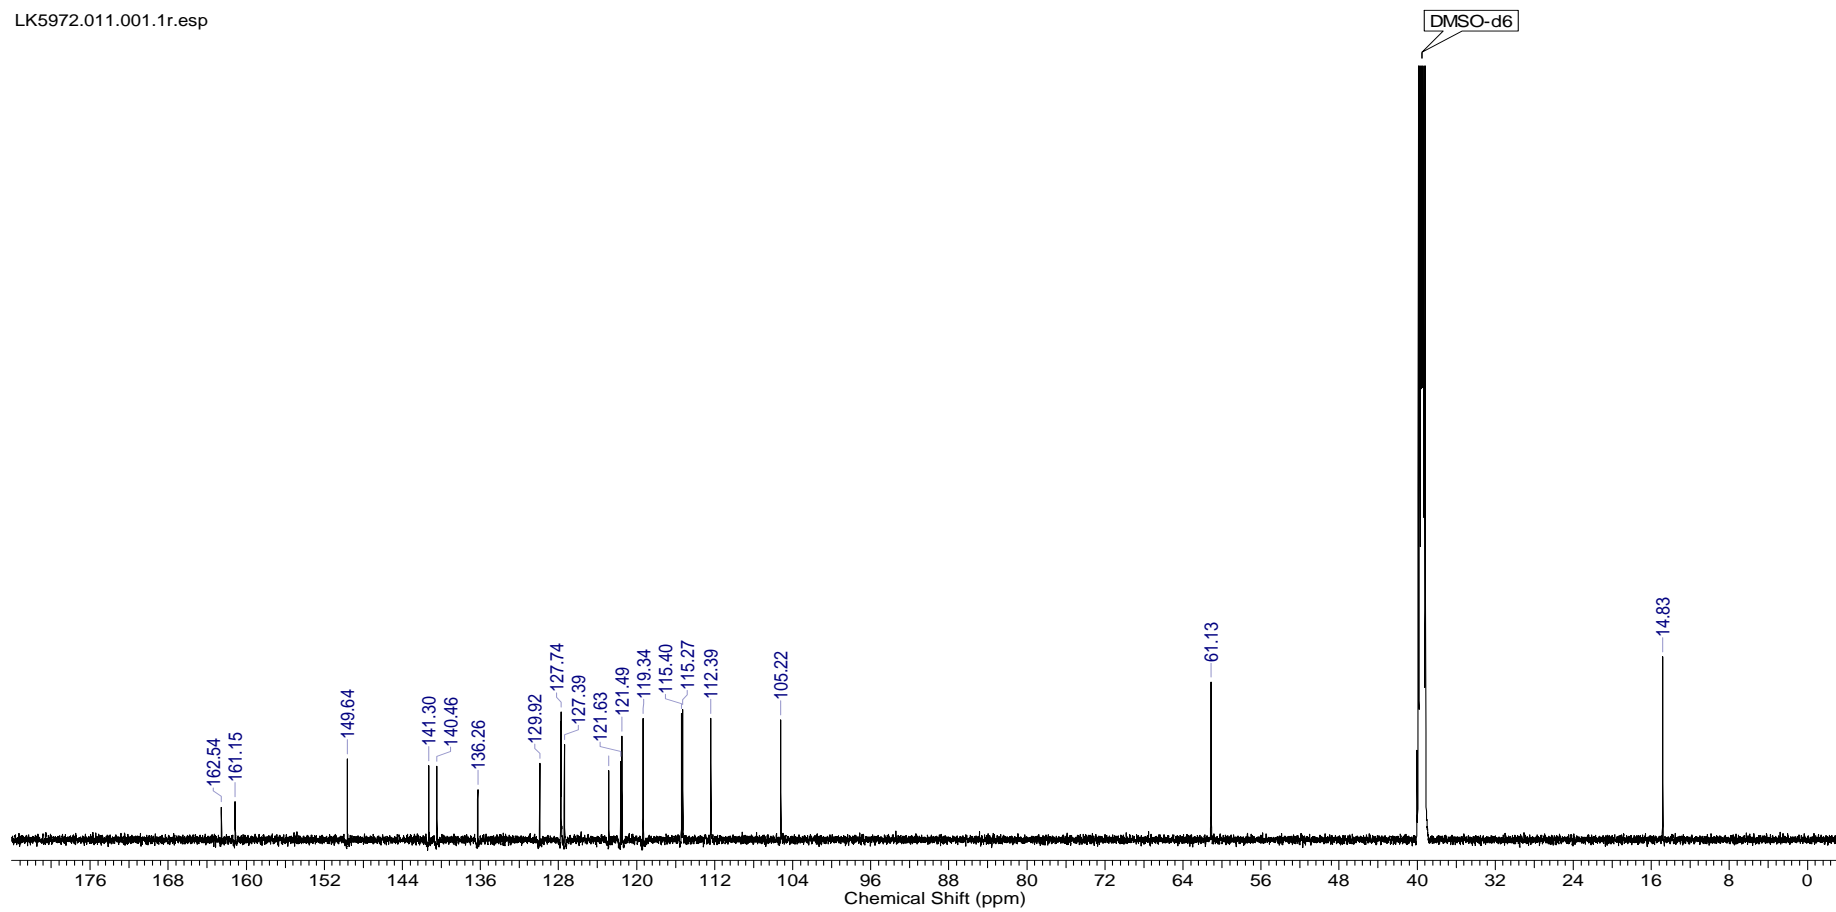

1-ethoxy-3-(4-fluorophenyl)-9H-pyrido[3,4-b]indole (**4k**) <sup>1</sup>H NMR (700 MHz, DMSO-d<sub>6</sub>)

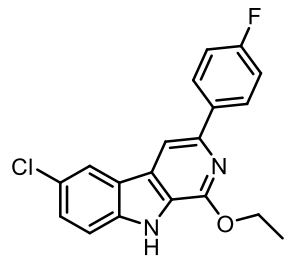

LK5973.010.001.1r.esp

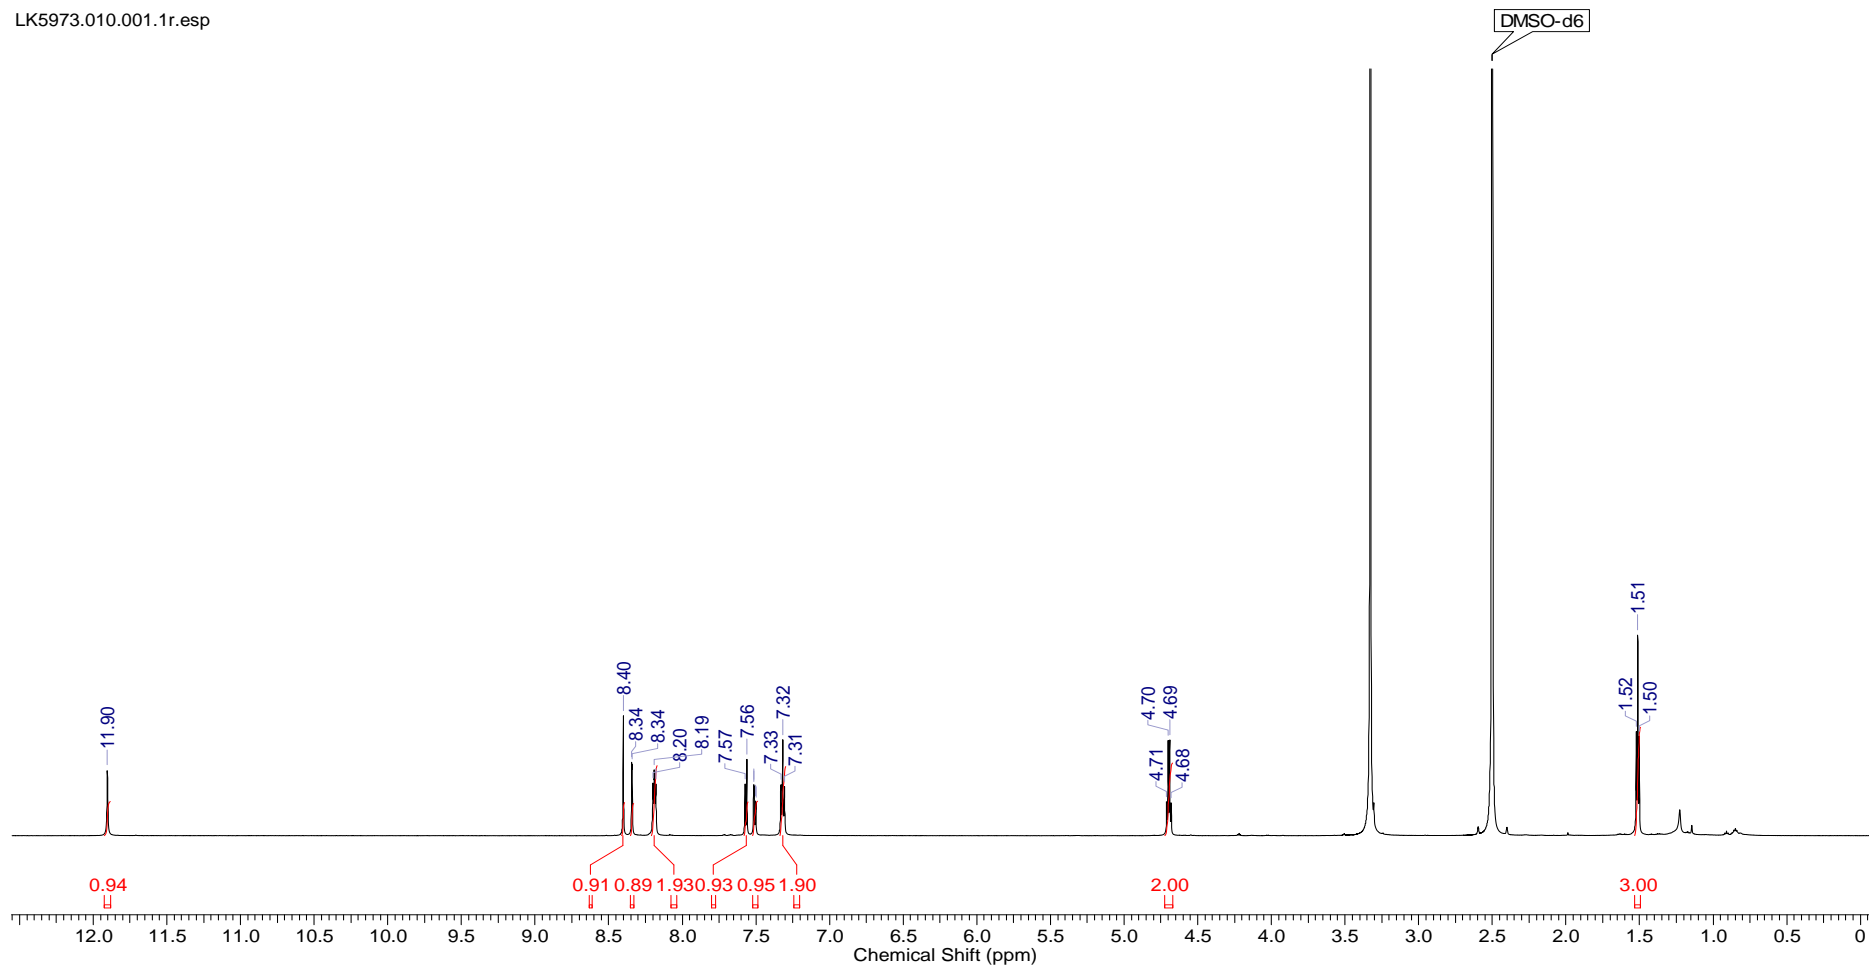

1-ethoxy-3-(4-fluorophenyl)-9H-pyrido[3,4-b]indole (**4k**)  $^{13}\text{C}$  {1H} NMR (177 MHz, DMSO- $d_6$ )

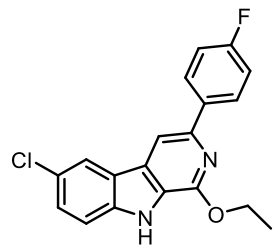

LK5973.011.001.1r.esp

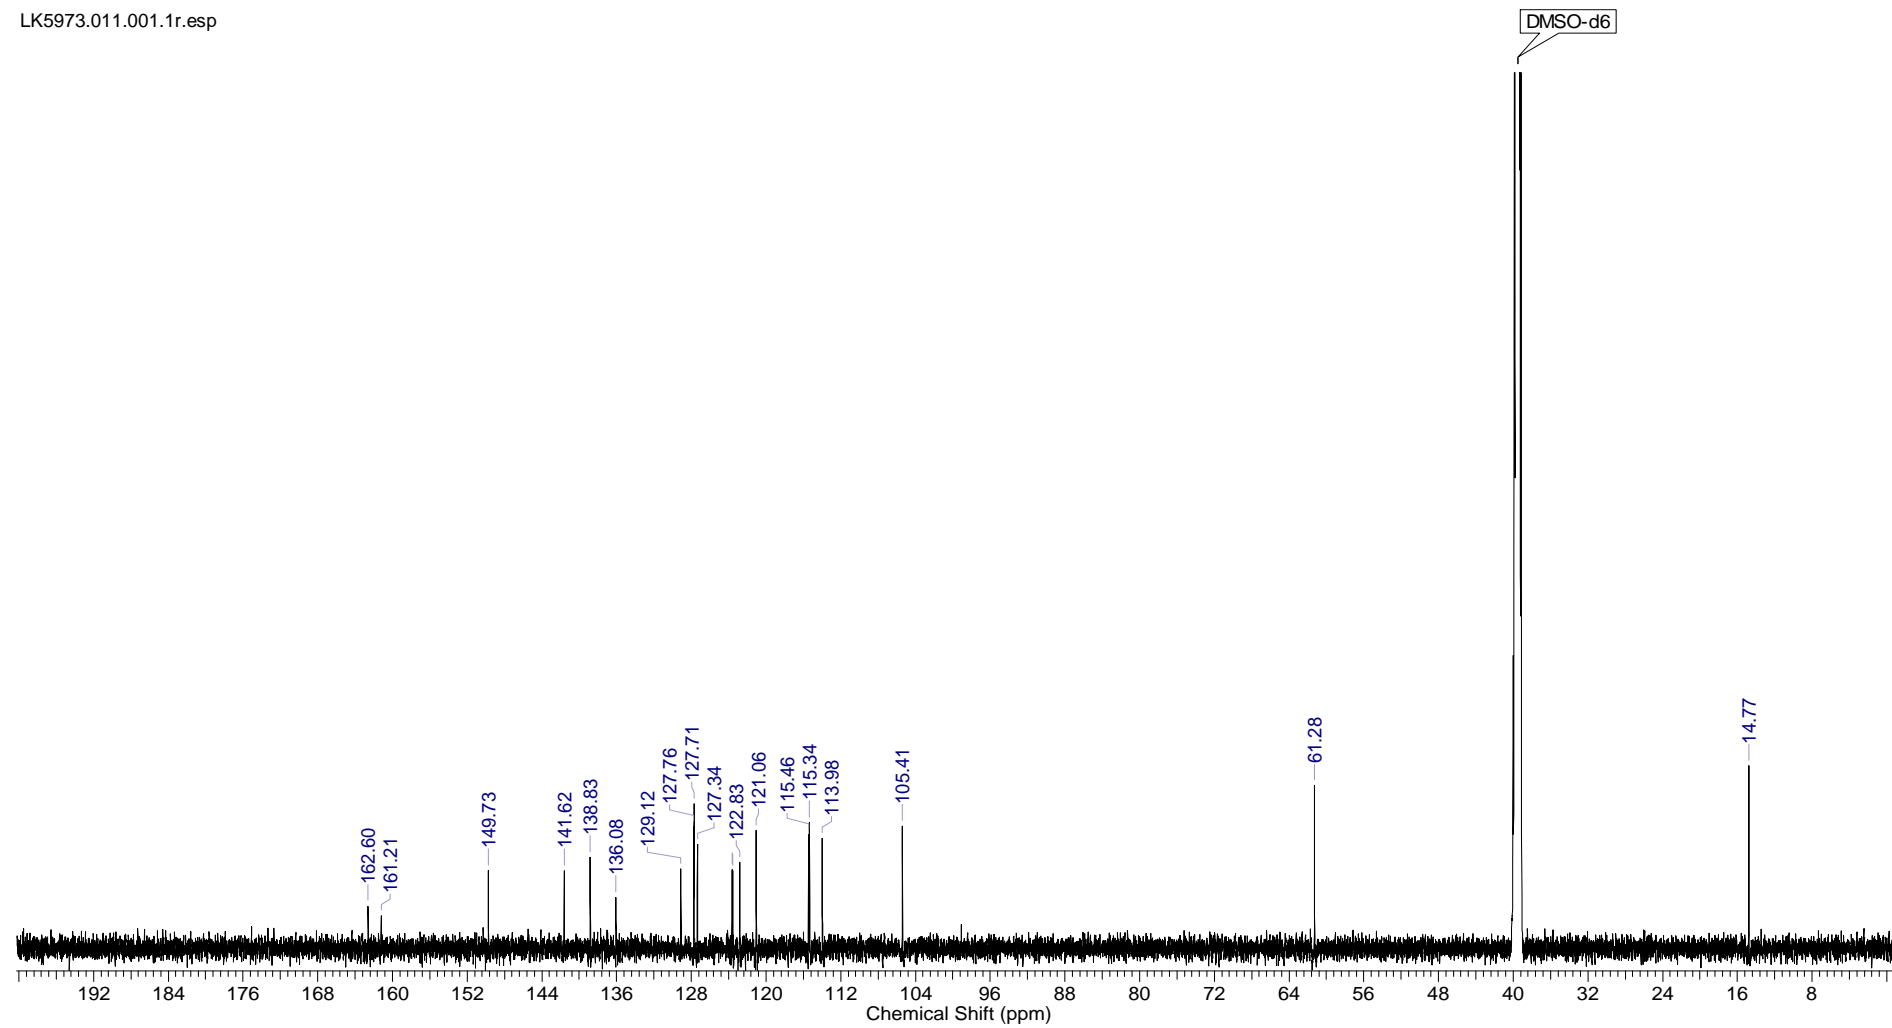

1-isobutoxy-9H-pyrido[3,4-b]indole (**41**) <sup>1</sup>H NMR (700 MHz, DMSO-d<sub>6</sub>)

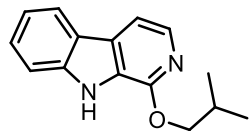

LK6062.010.001.1r.esp

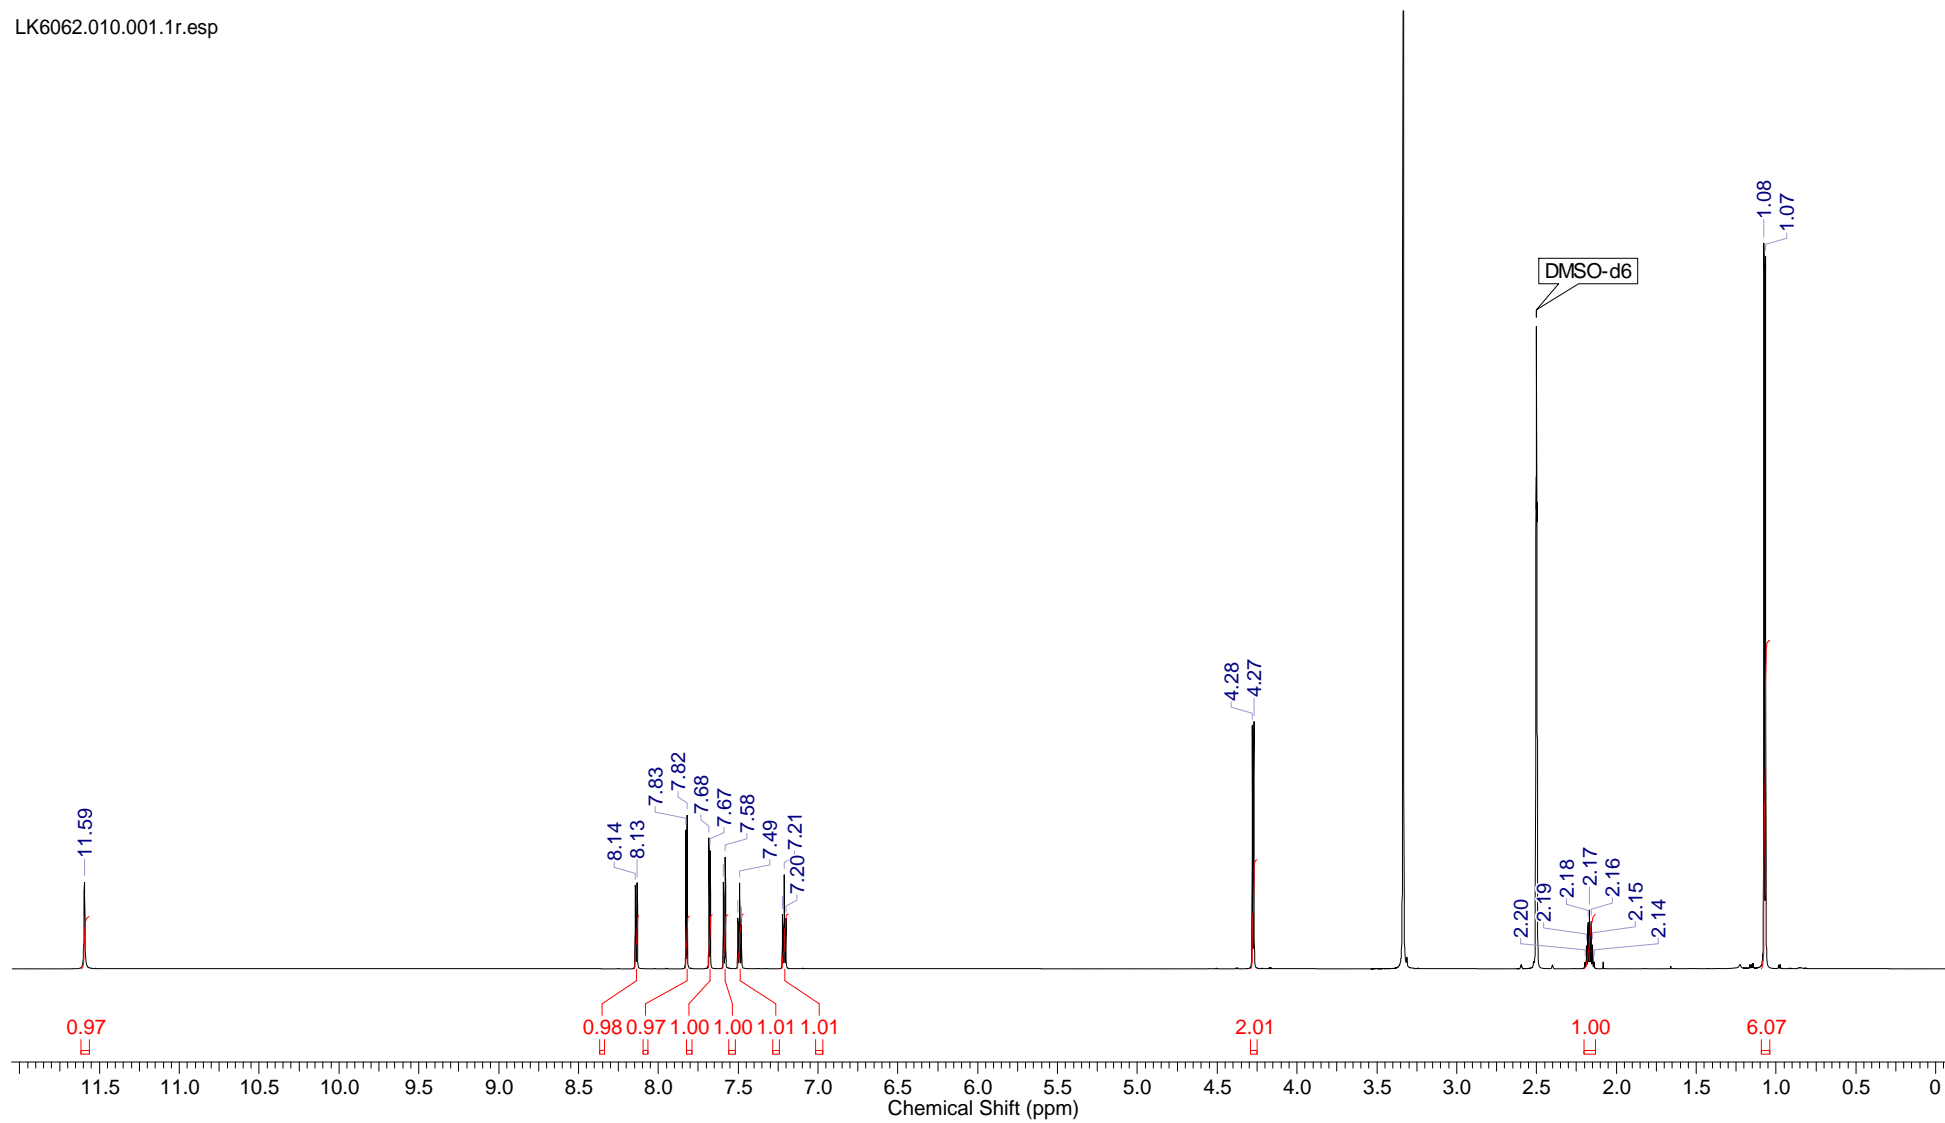



*1-isobutoxy-9H-pyrido[3,4-b]indole (4I)*  $^{13}\text{C}$  {1H} NMR (177 MHz, DMSO- $d_6$ )

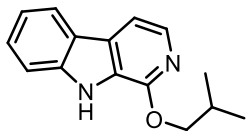

LK6062.011.001.1r.esp

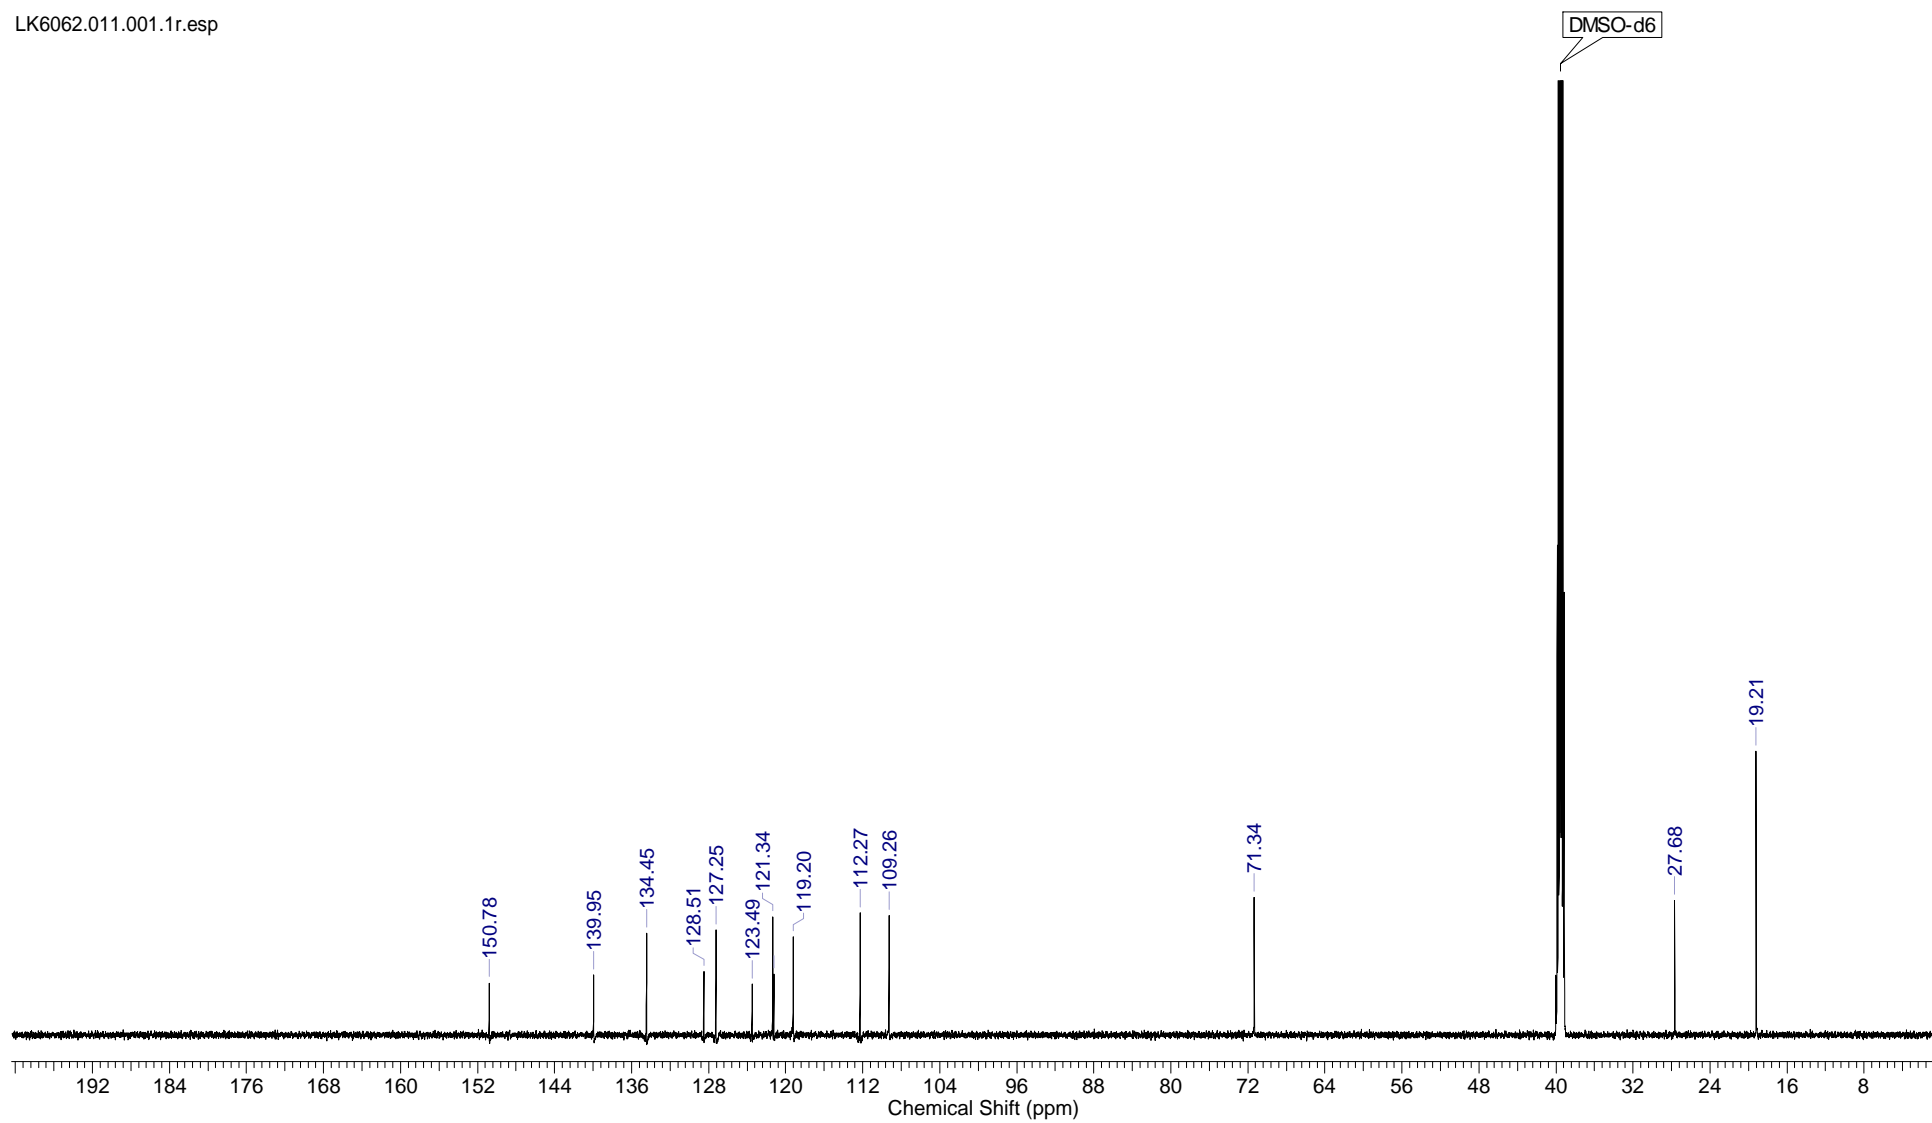

1-(cyclohexyloxy)-9H-pyrido[3,4-b]indole (**4m**) <sup>1</sup>H NMR (700 MHz, DMSO-d<sub>6</sub>)

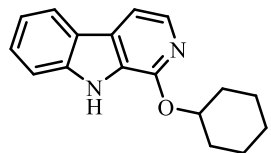

LK6070.010.001.1r.esp

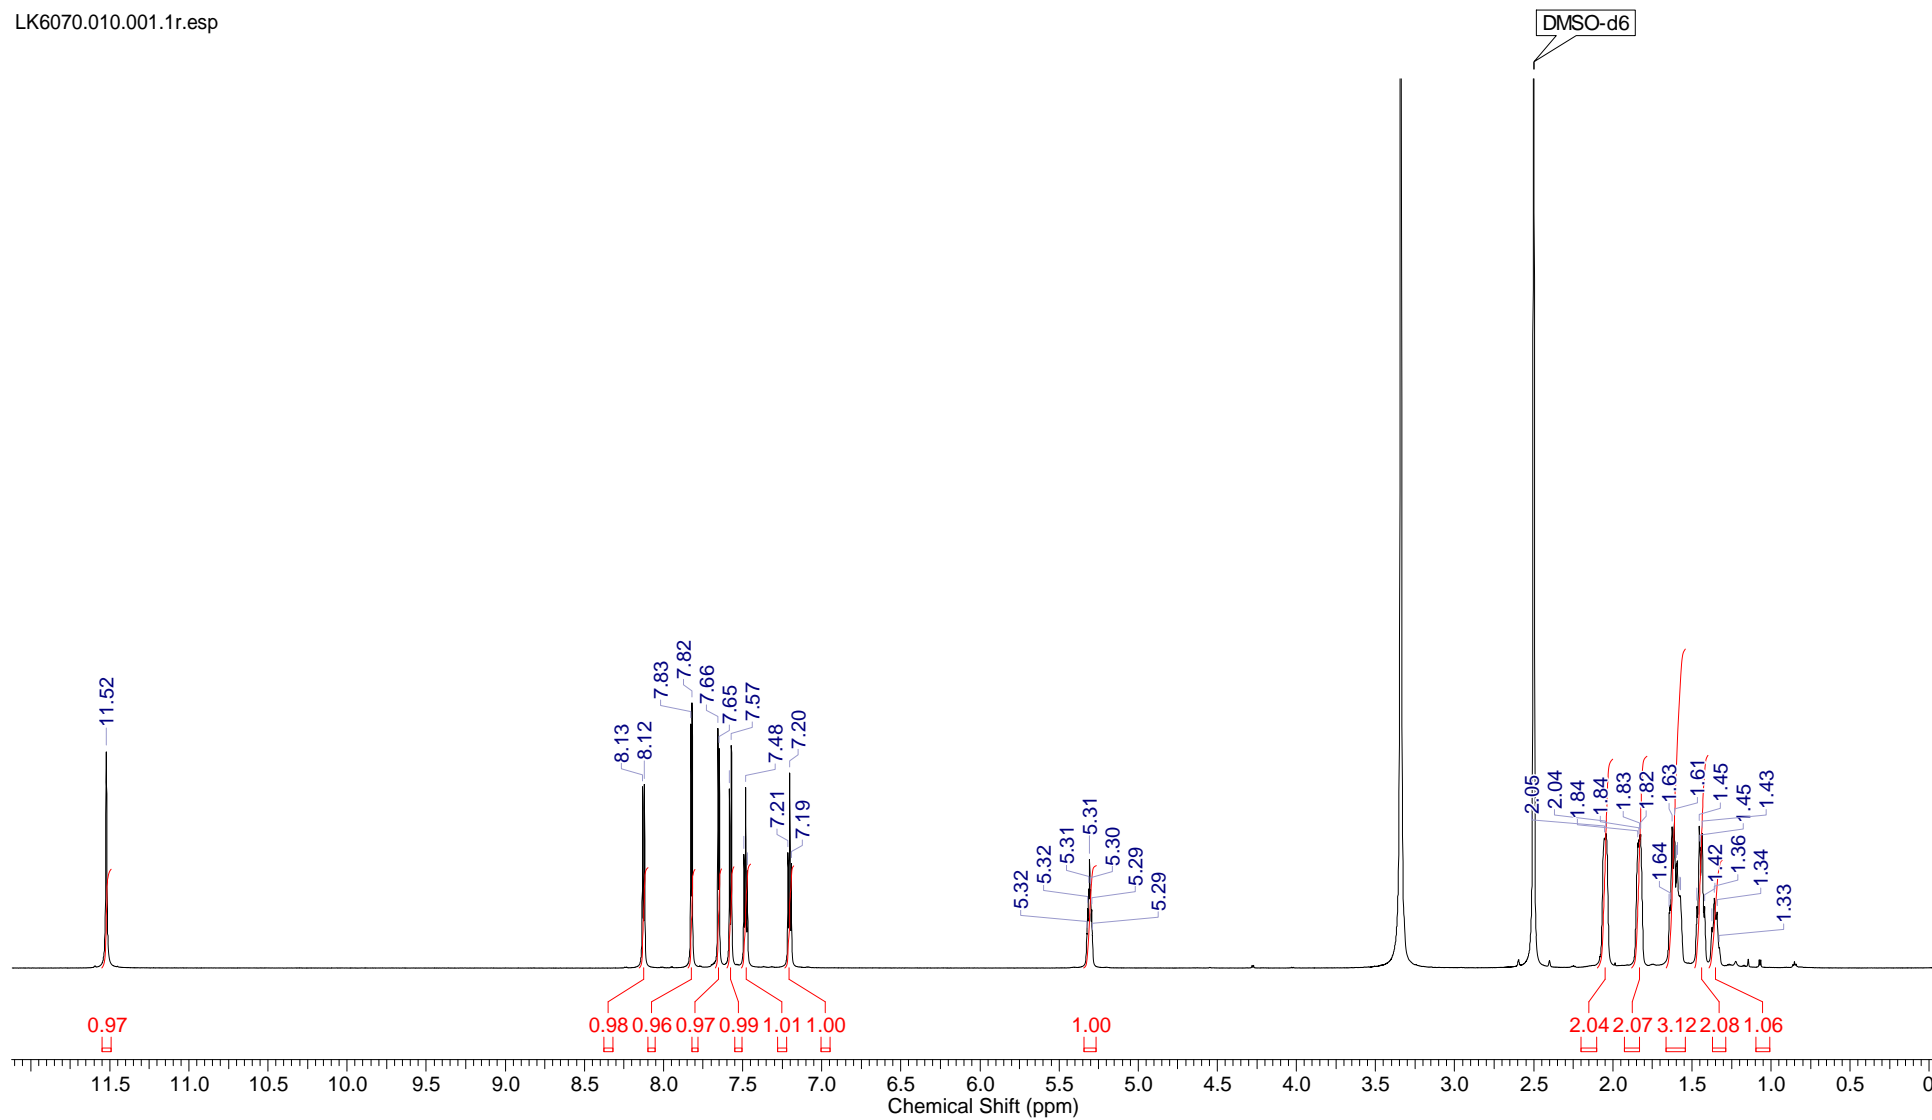

1-(cyclohexyloxy)-9H-pyrido[3,4-b]indole (**4m**)  $^{13}\text{C}$  {1H} NMR (177 MHz, DMSO- $d_6$ )

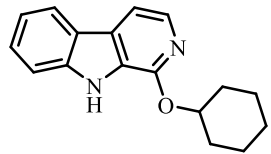

LK6070.011.001.1r.esp

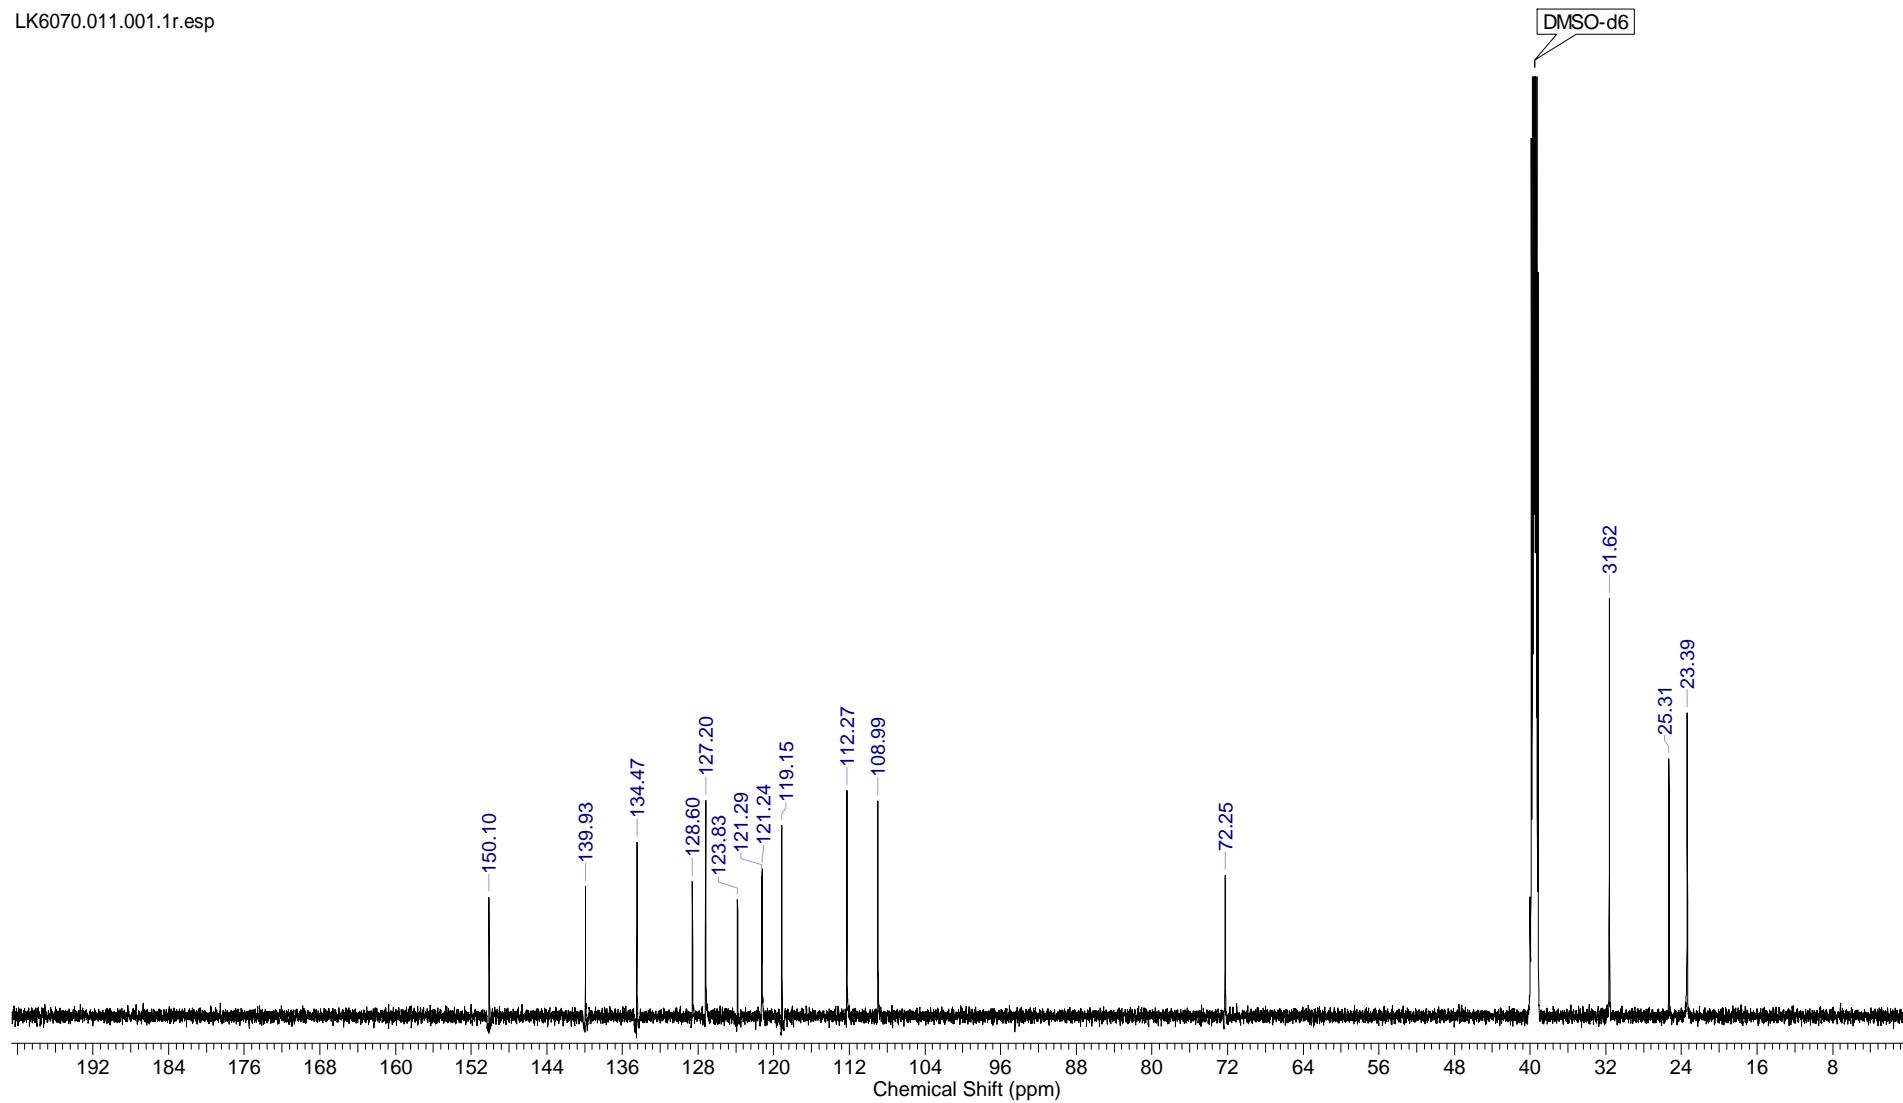

1-isopropoxy-9H-pyrido[3,4-b]indole (**4n**) <sup>1</sup>H NMR (700 MHz, DMSO-d<sub>6</sub>)

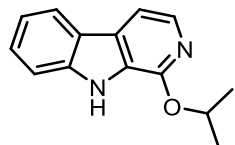

LK6028.010.001.1r.esp

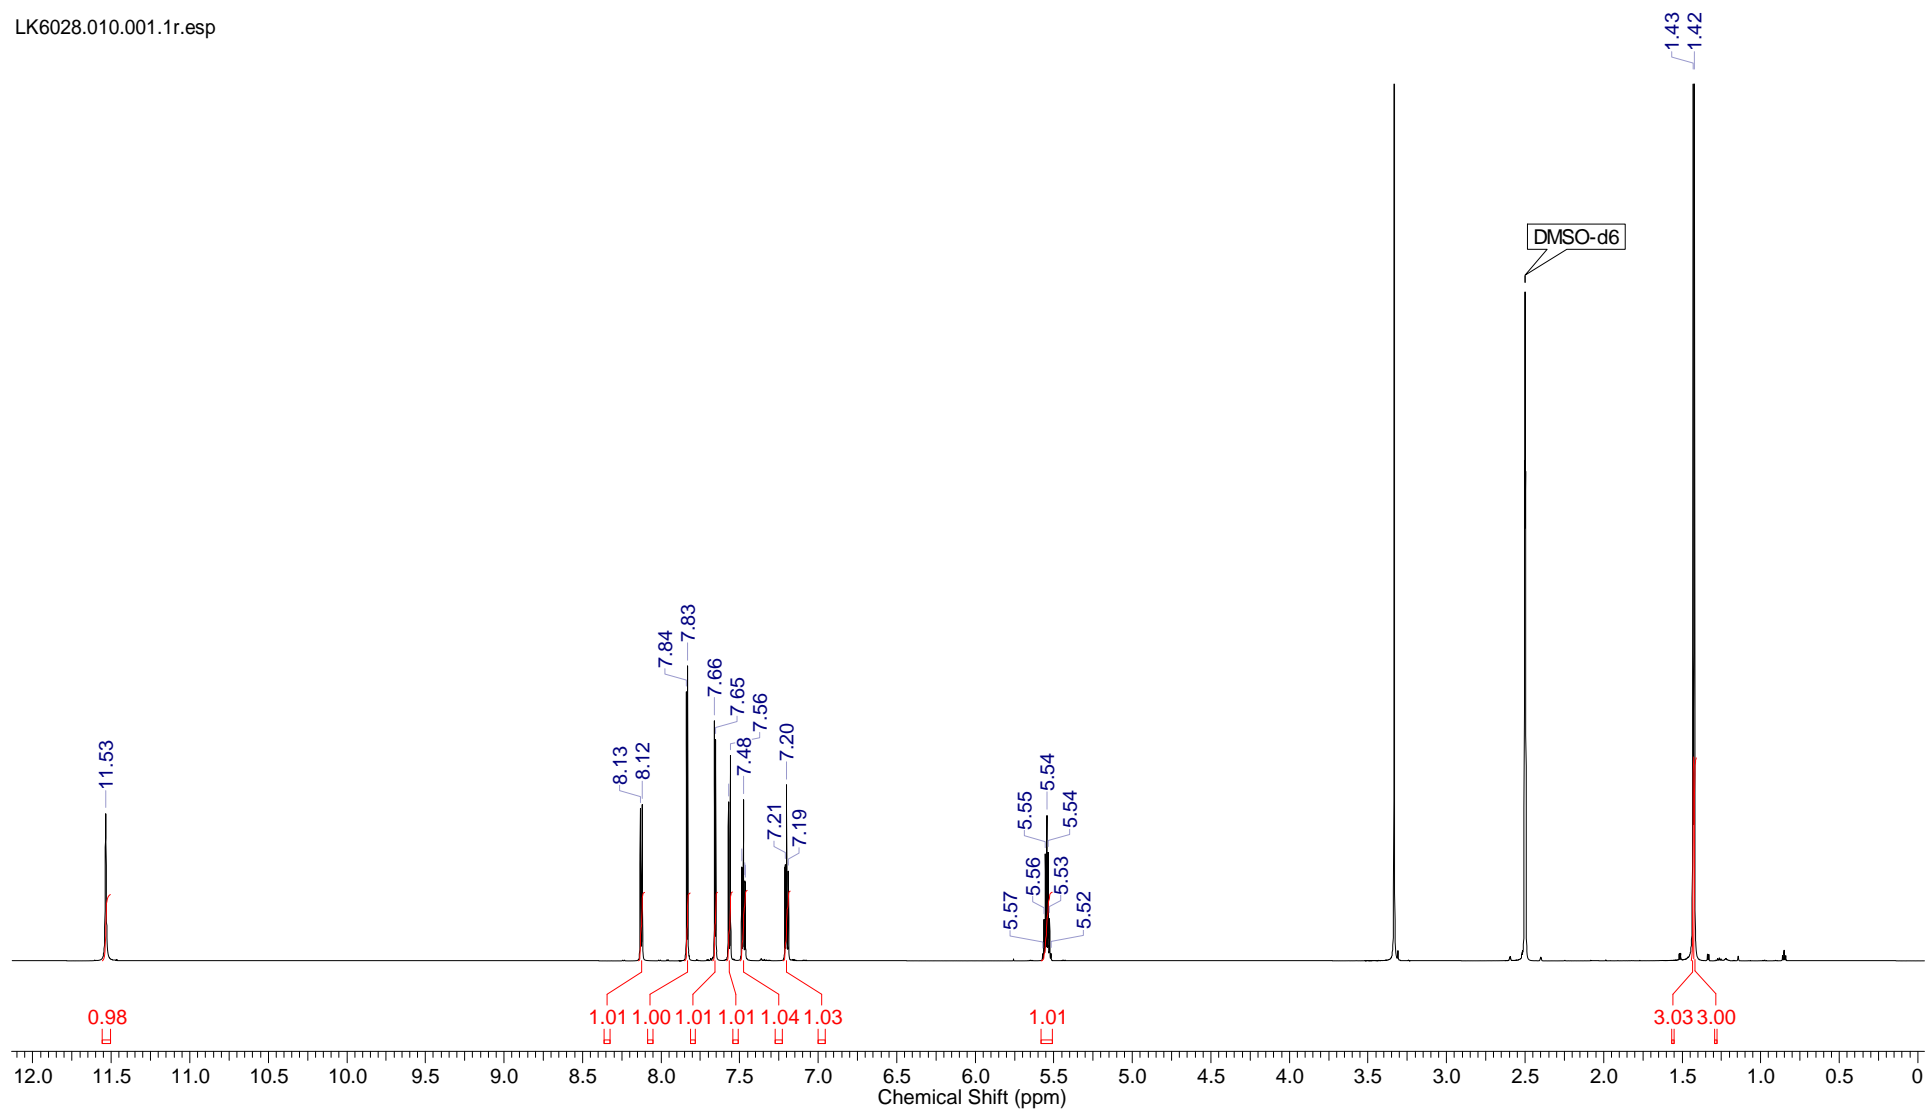

*1-isopropoxy-9H-pyrido[3,4-b]indole (4n)*  $^{13}\text{C}$  {1H} NMR (DMSO, 700 MHz)

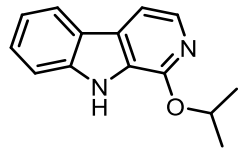

LK6028.011.001.1r.esp

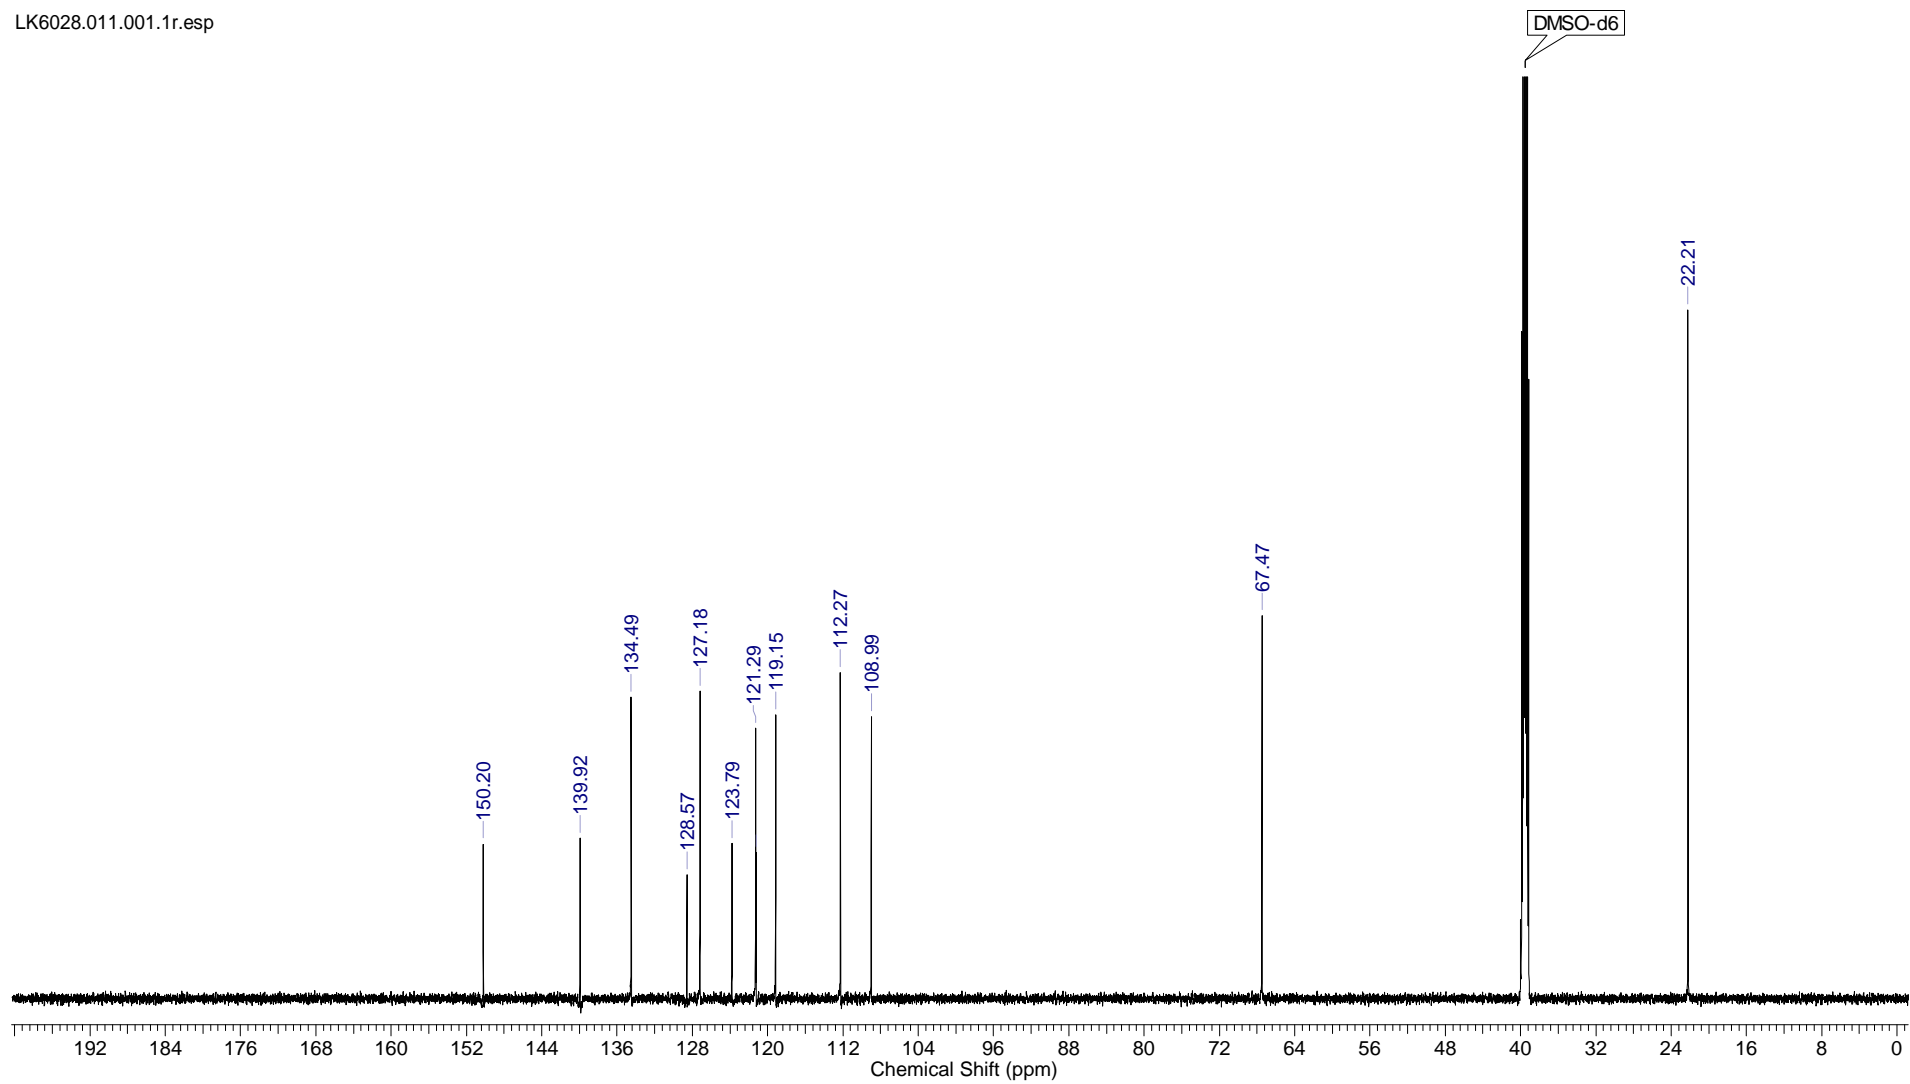

1-(benzyloxy)-9H-pyrido[3,4-b]indole (**4o**) <sup>1</sup>H NMR (700 MHz, DMSO-d<sub>6</sub>)

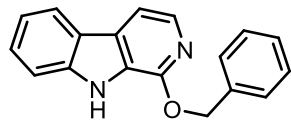

LK6030.010.001.1r.esp

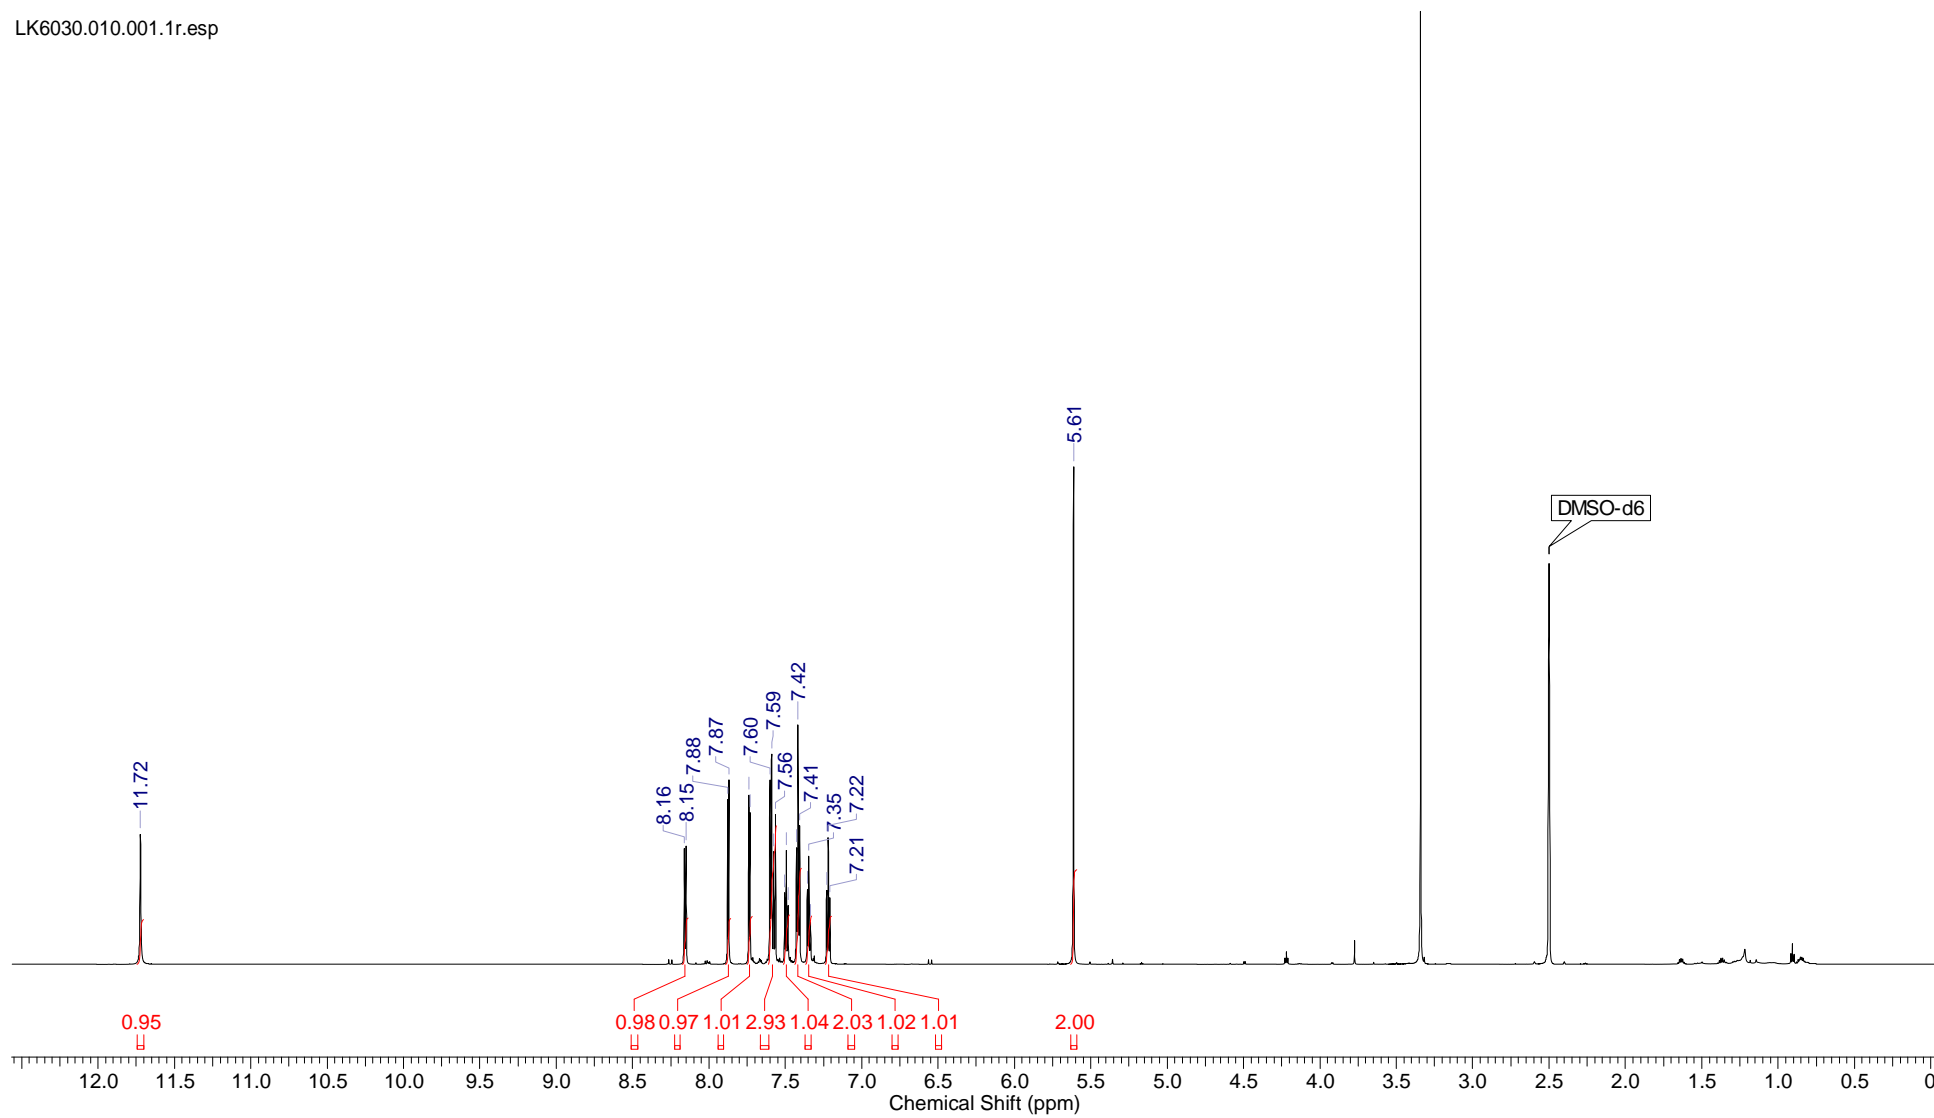

1-(benzyloxy)-9H-pyrido[3,4-b]indole (**4o**)  $^{13}\text{C}$  {1H} NMR (177 MHz, DMSO- $d_6$ )

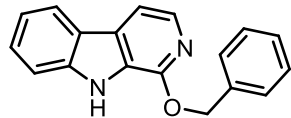

LK6030.011.001.1r.esp

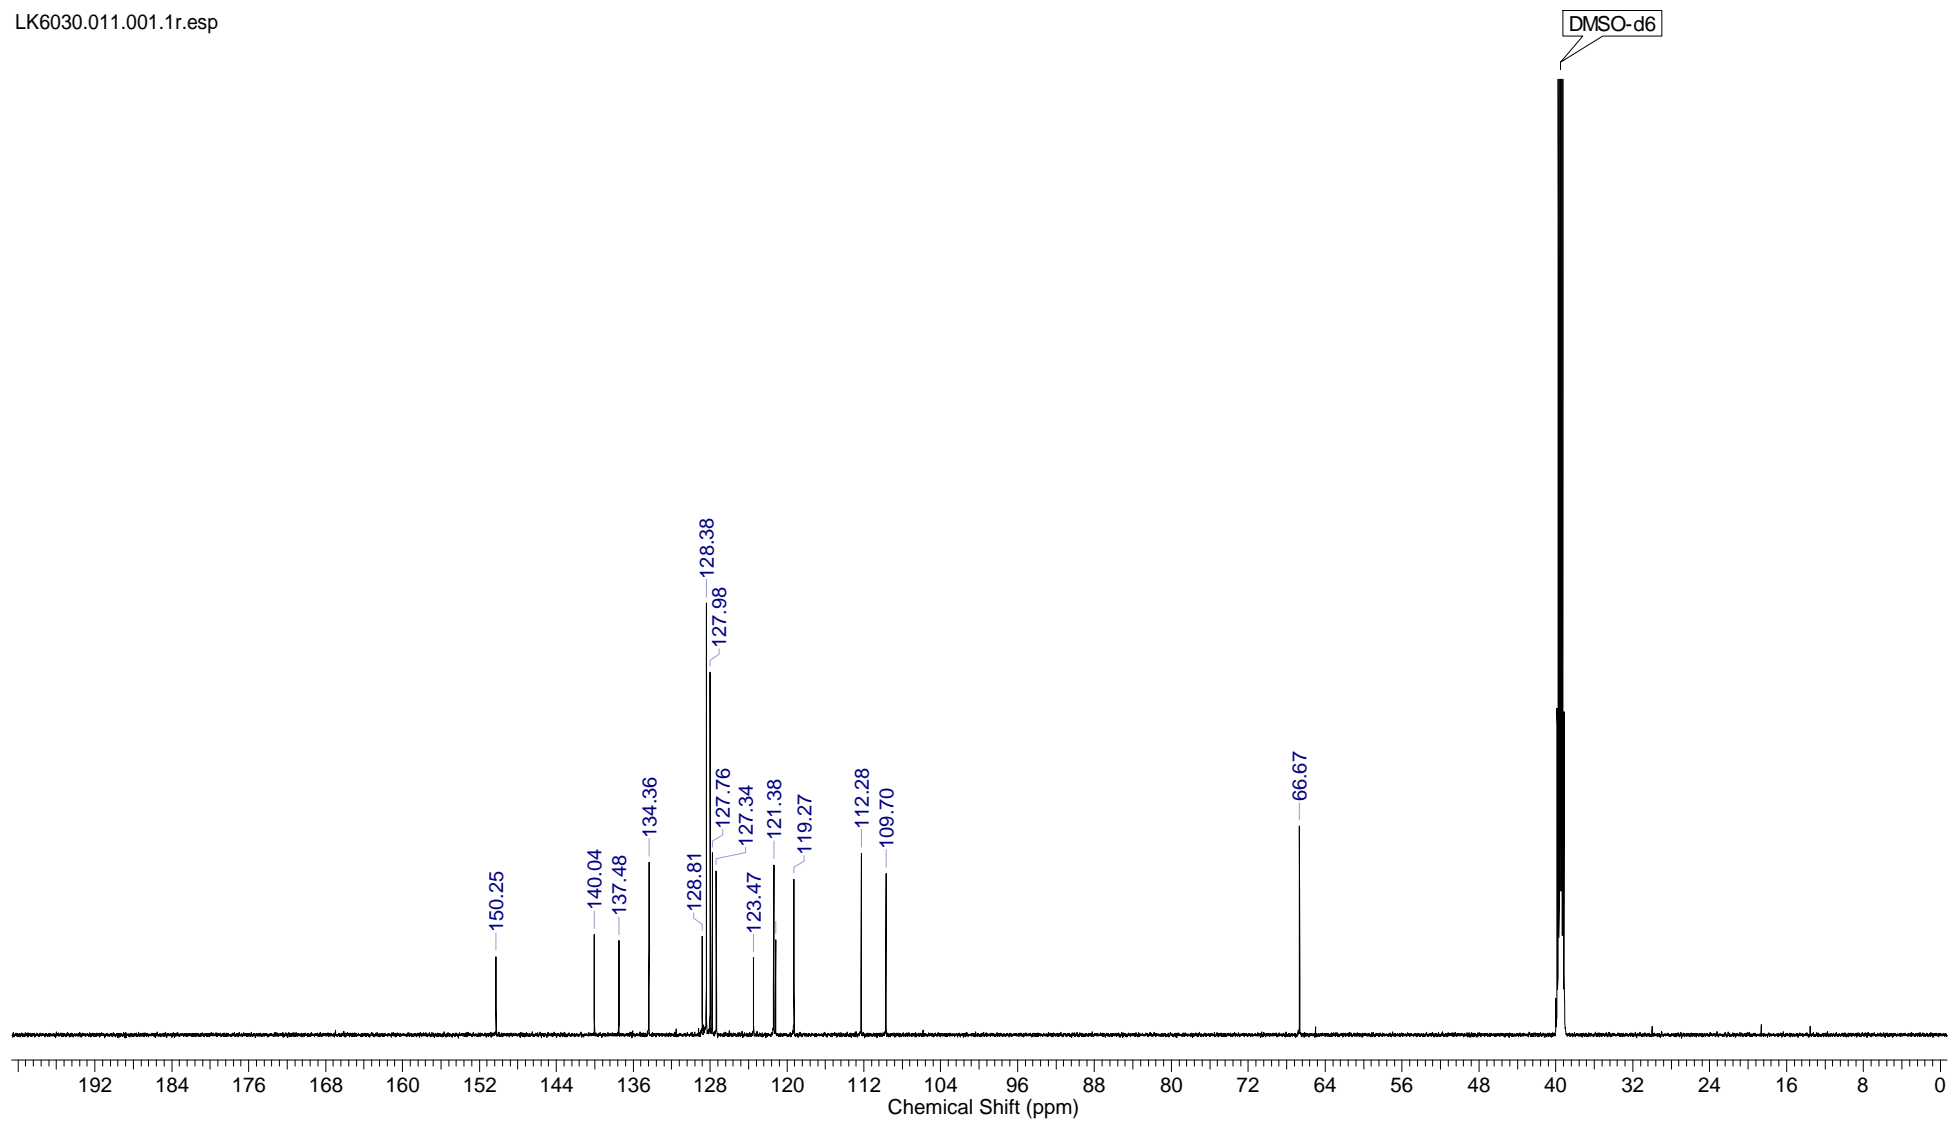

1-(benzyloxy)-6-chloro-3-phenyl-9H-pyrido[3,4-b]indole (**4p**) <sup>1</sup>H NMR (700 MHz, DMSO-d<sub>6</sub>)

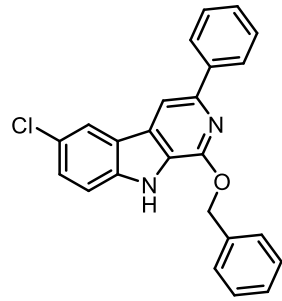

LK6007.062.001.1r.esp

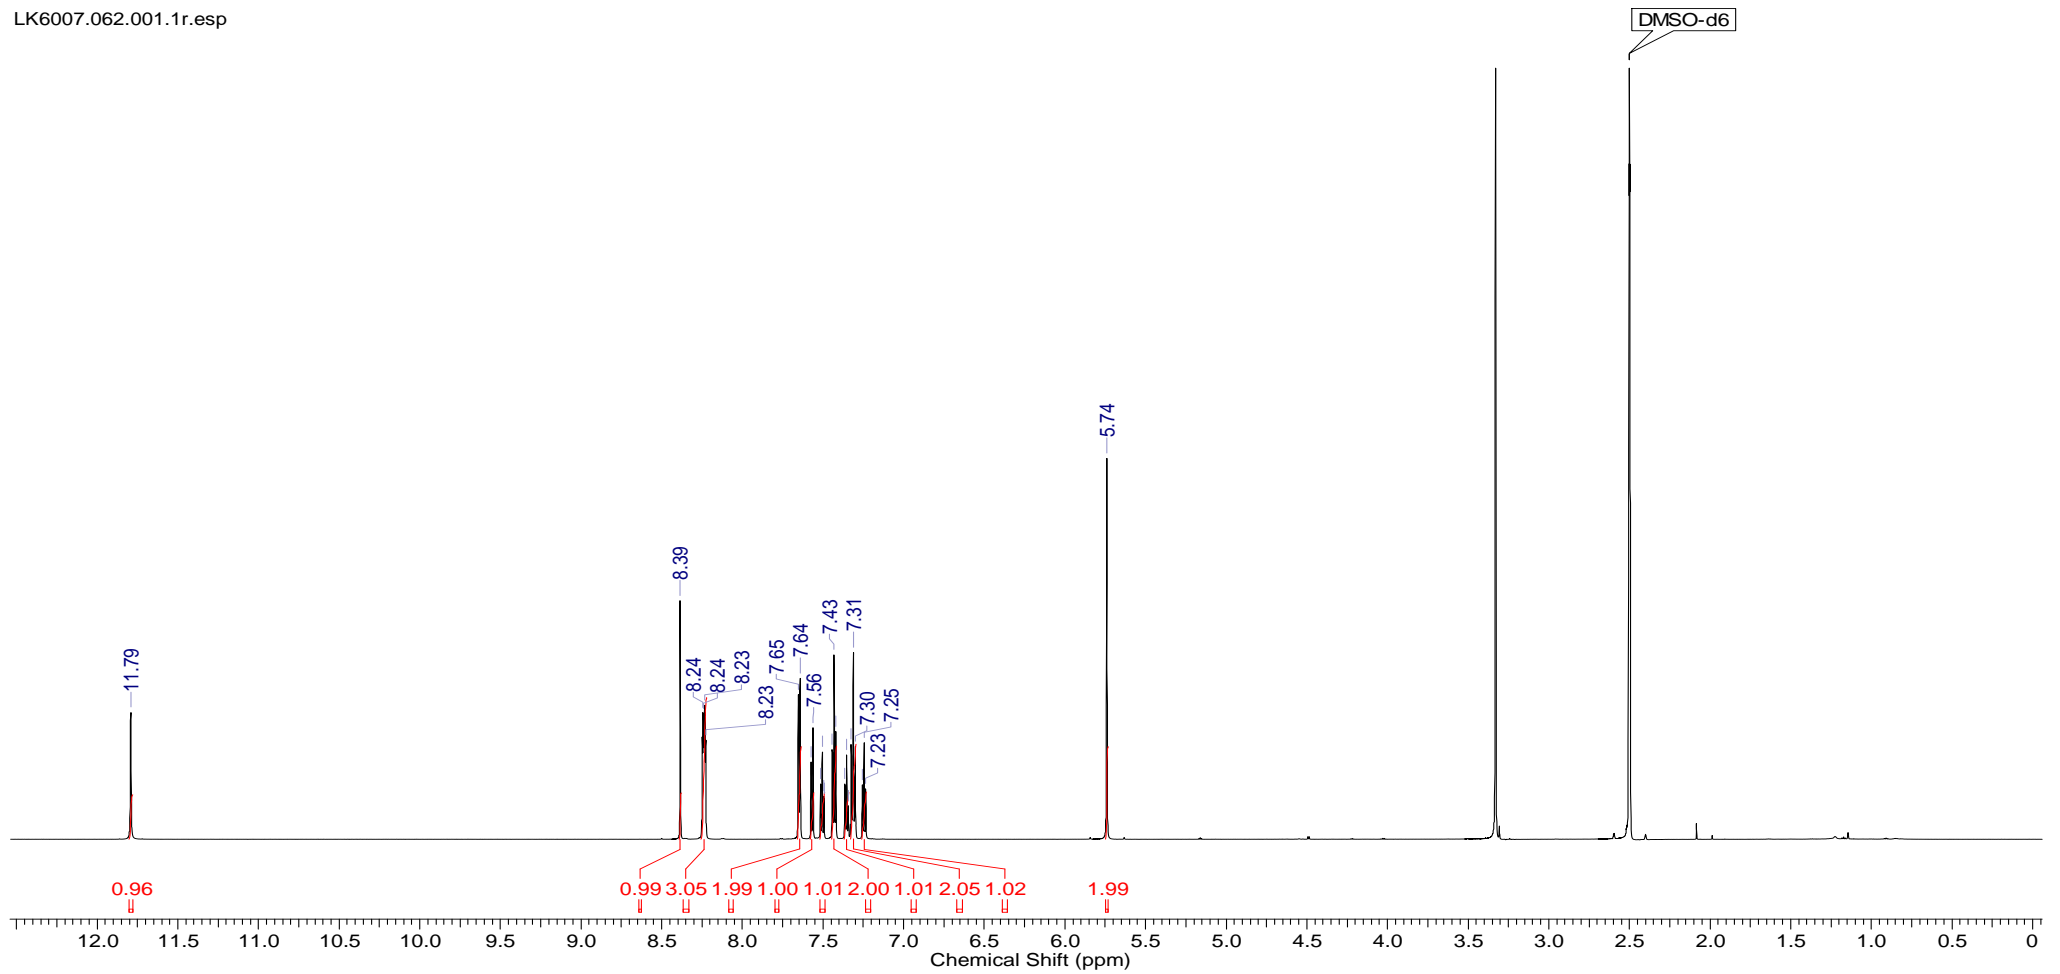



1-(benzyloxy)-6-chloro-3-phenyl-9H-pyrido[3,4-b]indole (**4p**)  $^{13}\text{C}$  {1H} NMR (177 MHz, DMSO- $d_6$ )

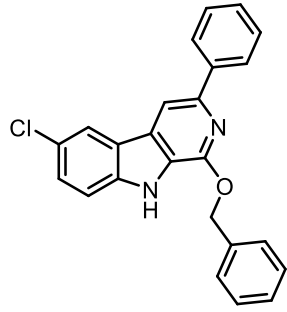

LK6007.063.001.1r.esp

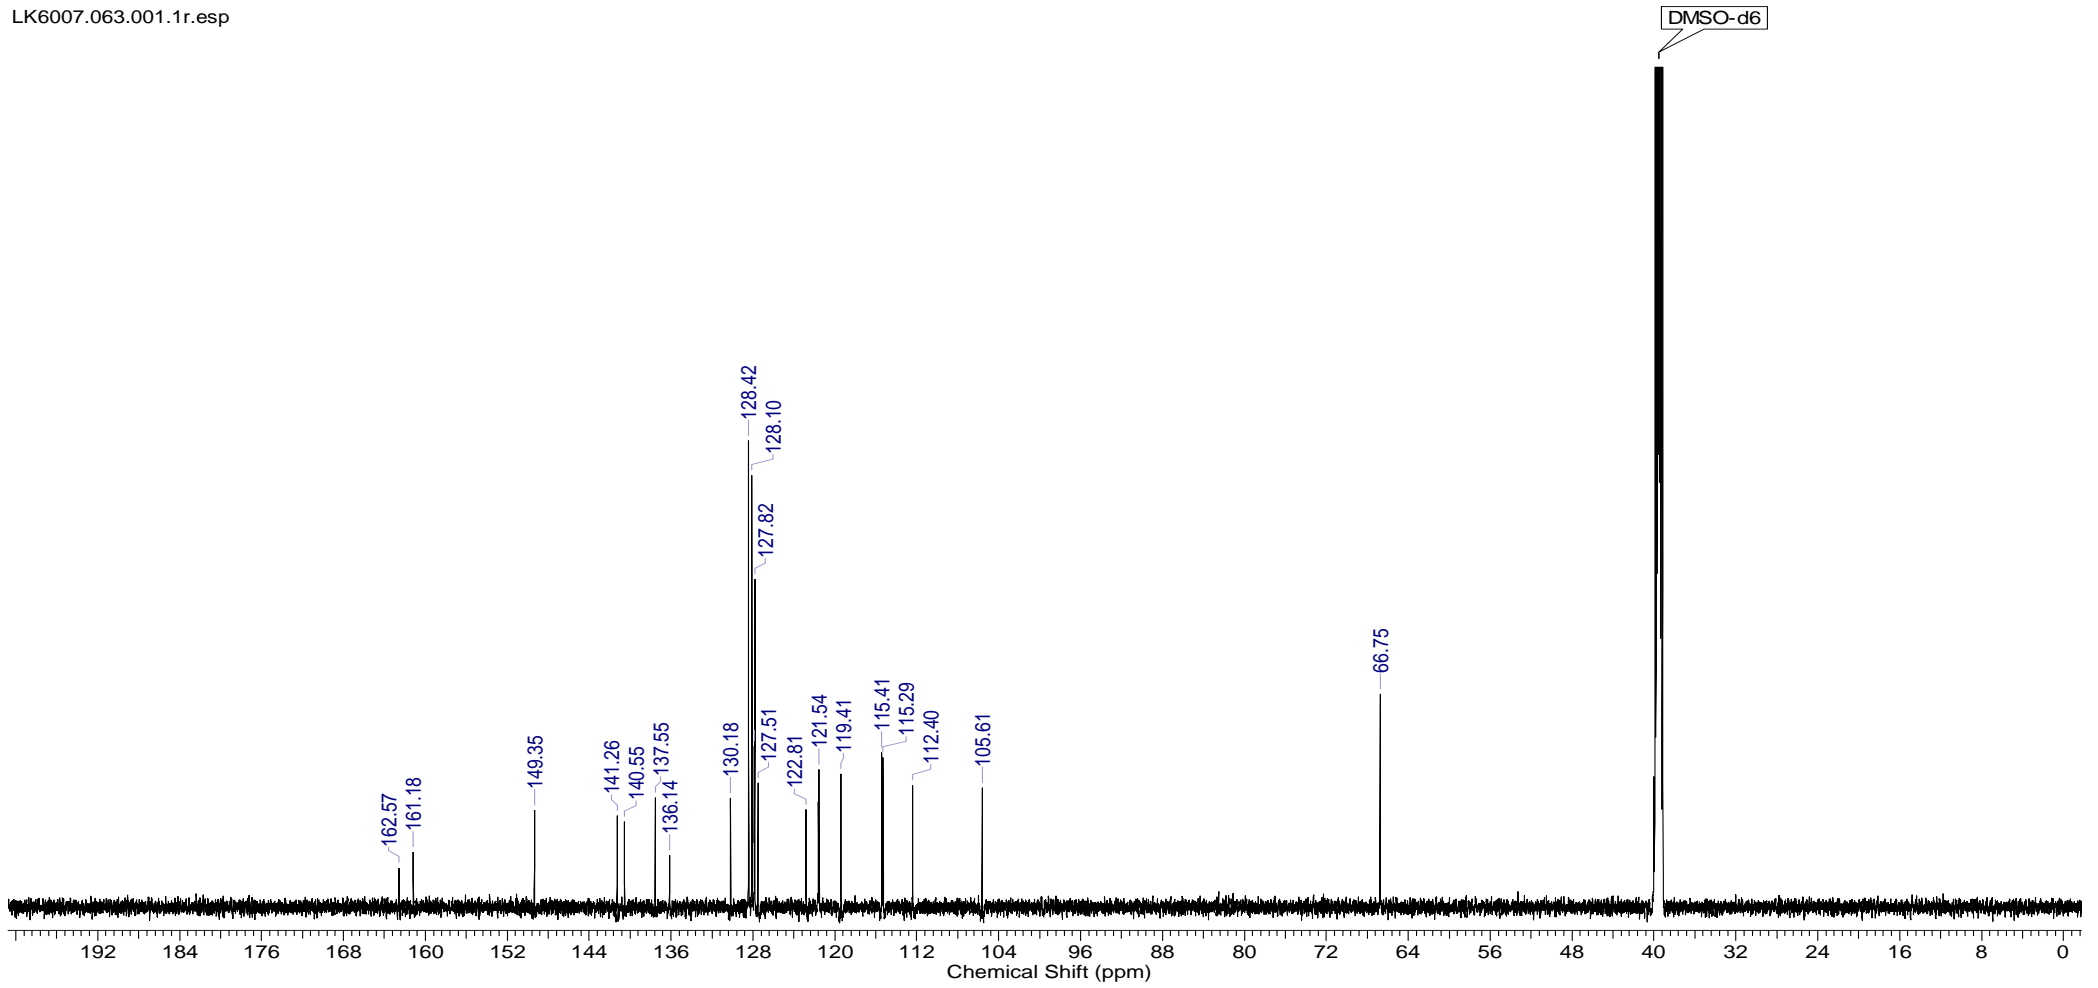

6-chloro-3-(4-fluorophenyl)-1-(furan-2-ylmethoxy)-9H-pyrido[3,4-b]indole (**4q**) <sup>1</sup>H NMR (700 MHz, DMSO-d<sub>6</sub>)

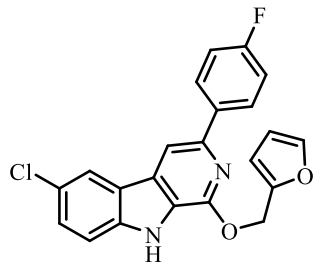

LK6018.010.001.1r.esp

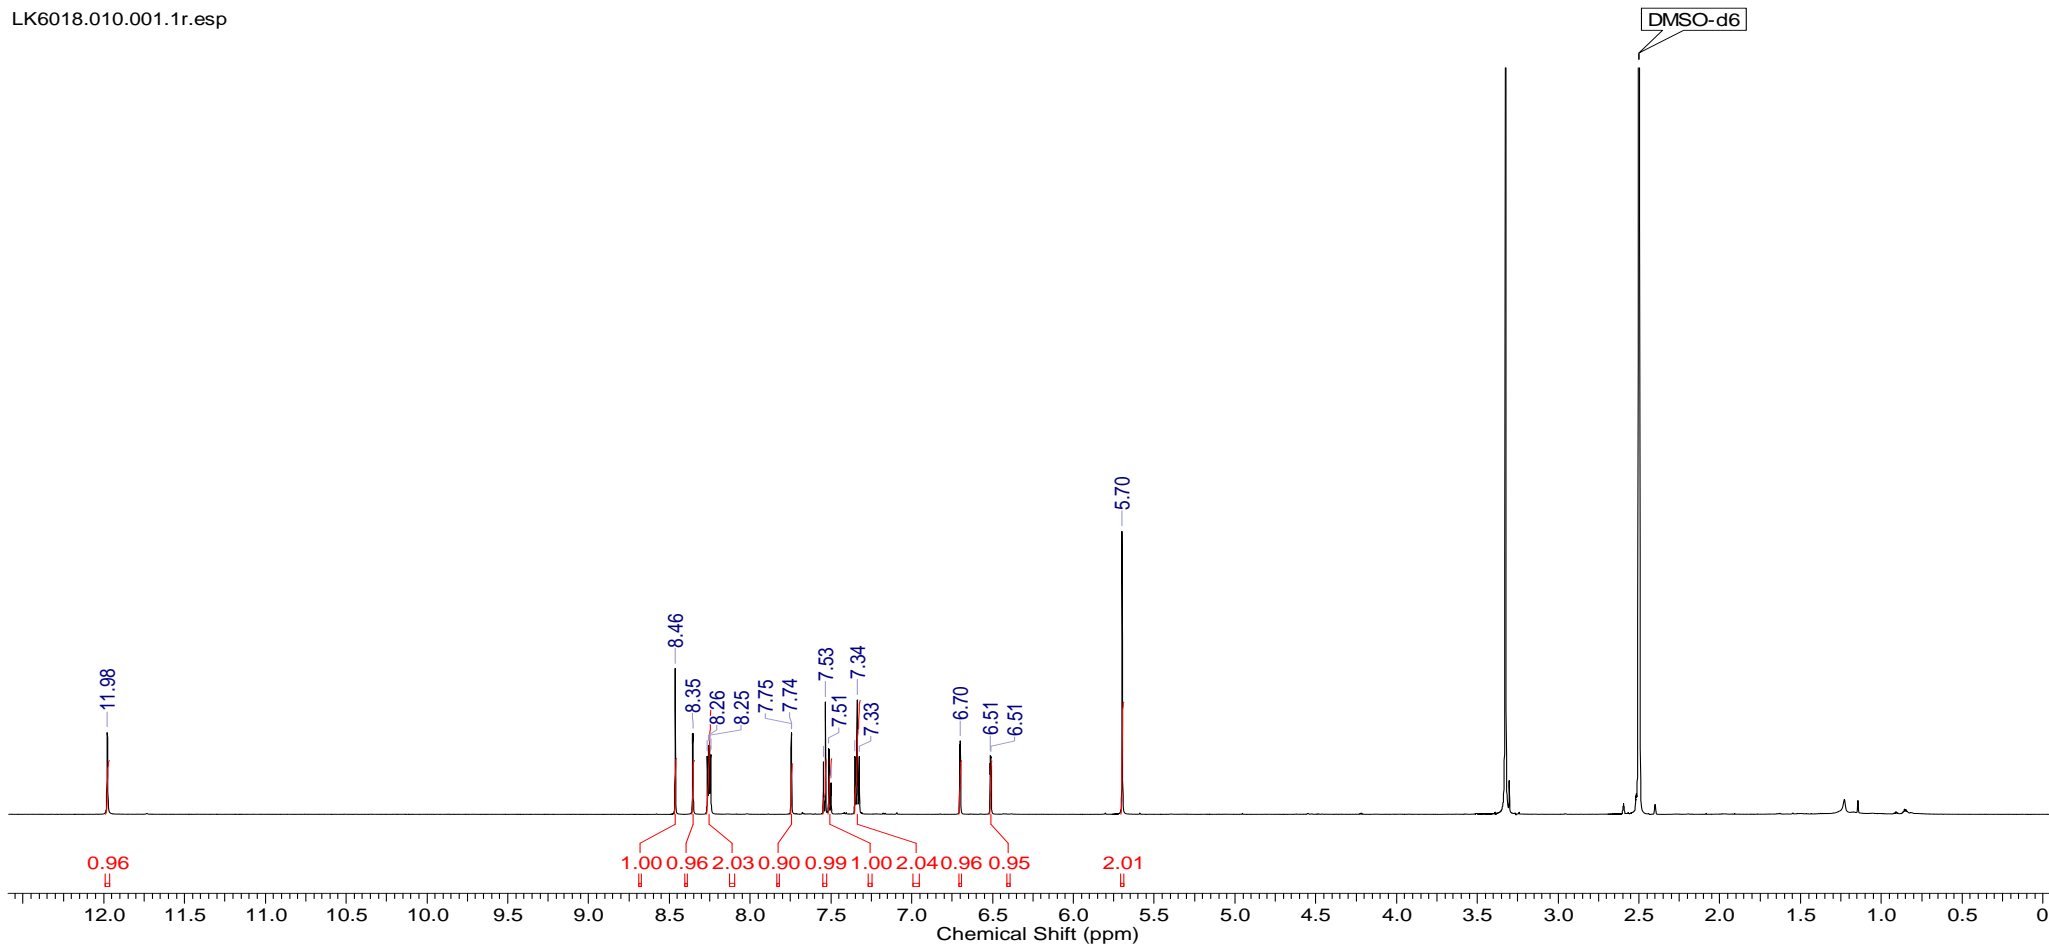

6-chloro-3-(4-fluorophenyl)-1-(furan-2-ylmethoxy)-9H-pyrido[3,4-b]indole (**4q**)  $^{13}\text{C}$  {1H} NMR (177 MHz, DMSO- $d_6$ )

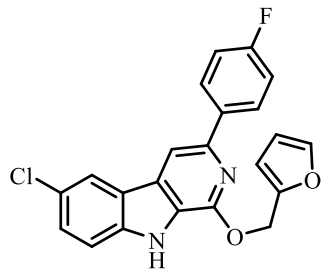

LK6018.020.001.1r.esp

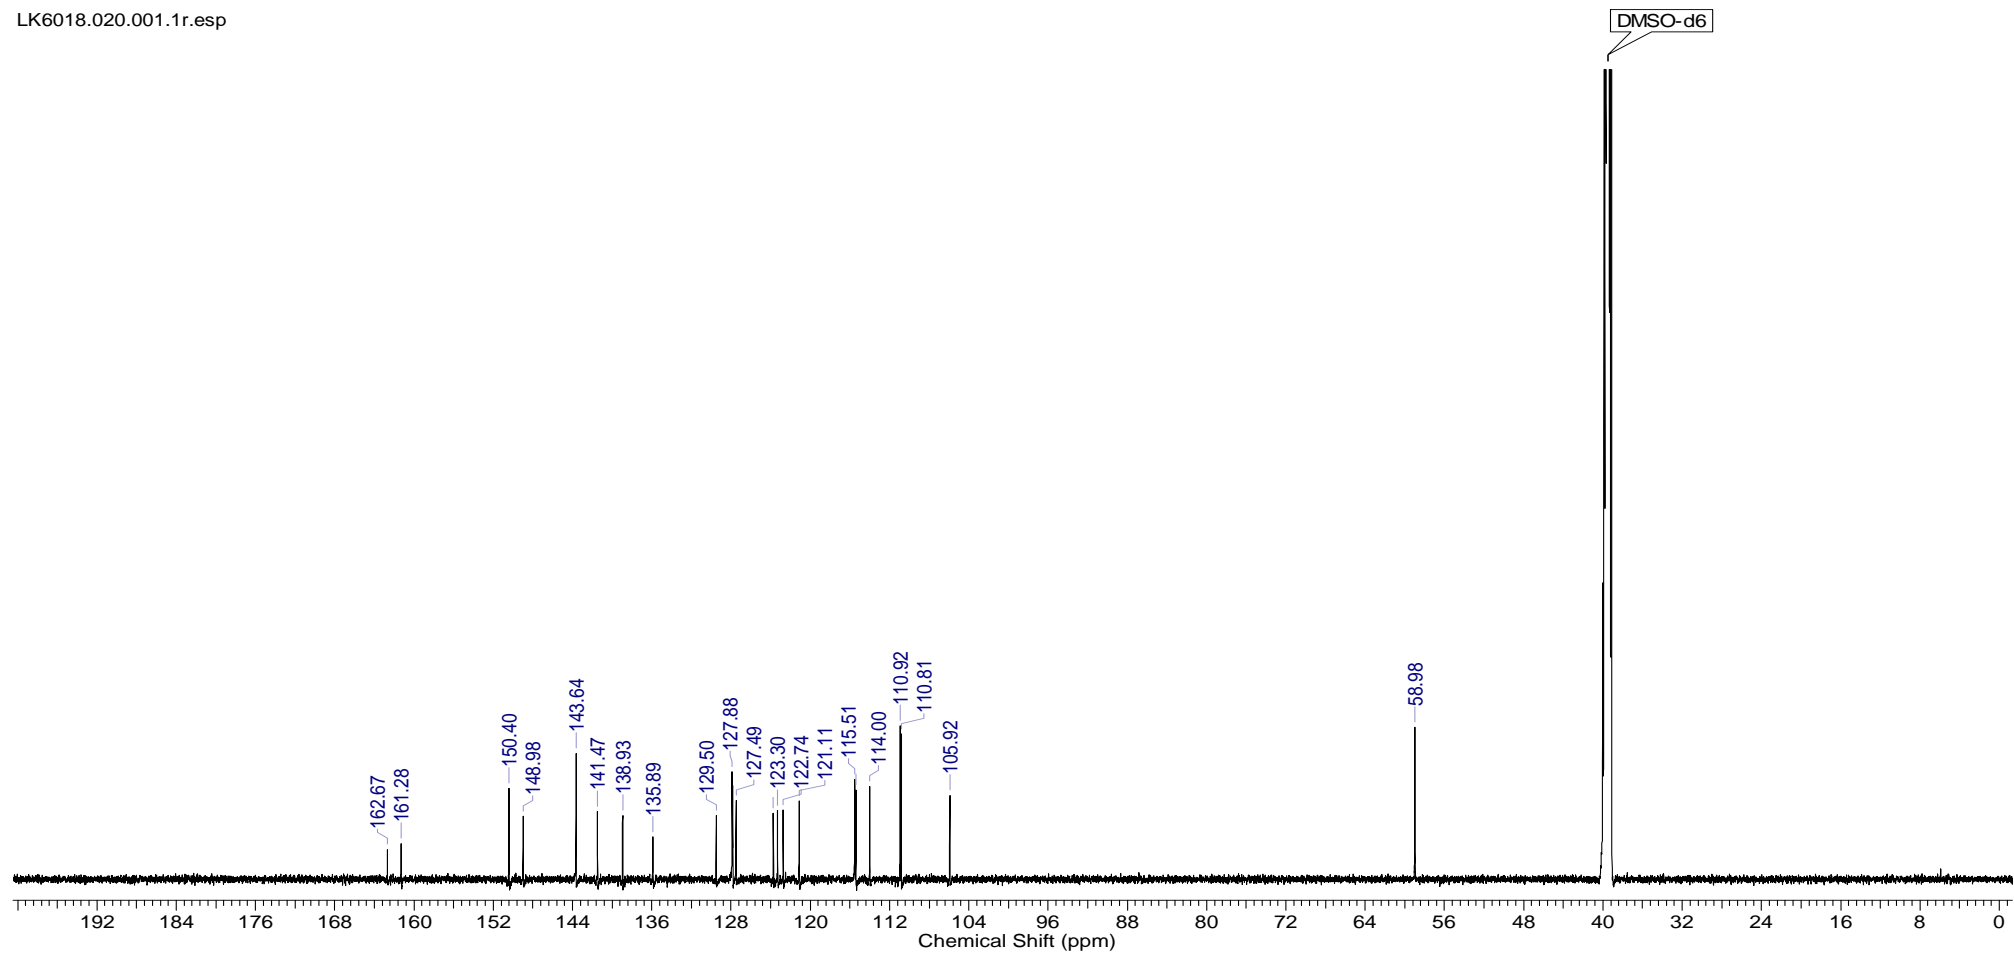

2-((9H-pyrido[3,4-b]indol-1-yl)oxy)-N,N-dimethylethan-1-amine (**4r**) <sup>1</sup>H NMR (700 MHz, DMSO-d<sub>6</sub>)

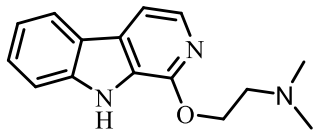

LK6113.010.001.1r.esp

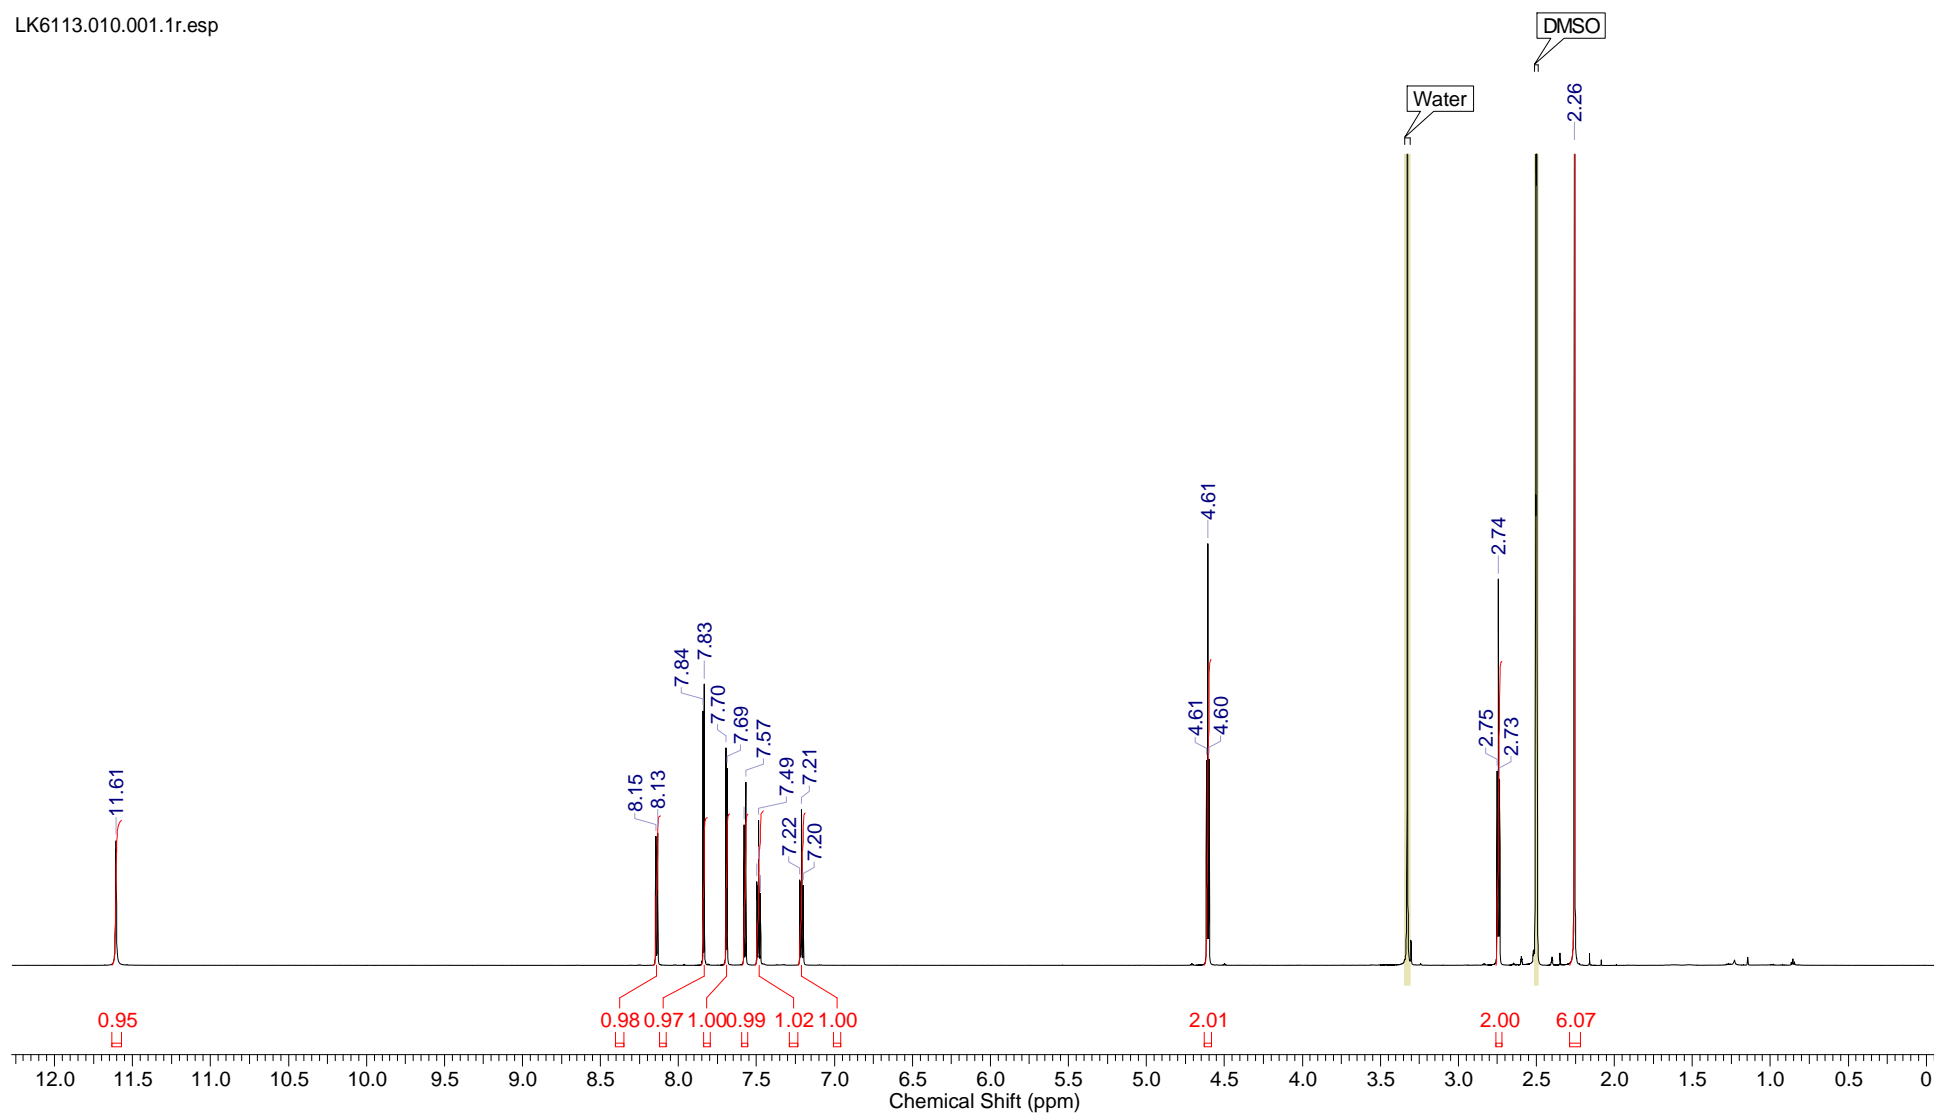

2-((9H-pyrido[3,4-b]indol-1-yl)oxy)-N,N-dimethylethan-1-amine (**4r**)  $^{13}\text{C}$  {1H} NMR (177 MHz, DMSO- $d_6$ )

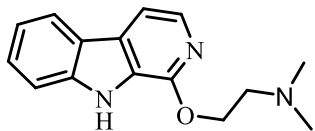

LK6113.011.001.1r.esp

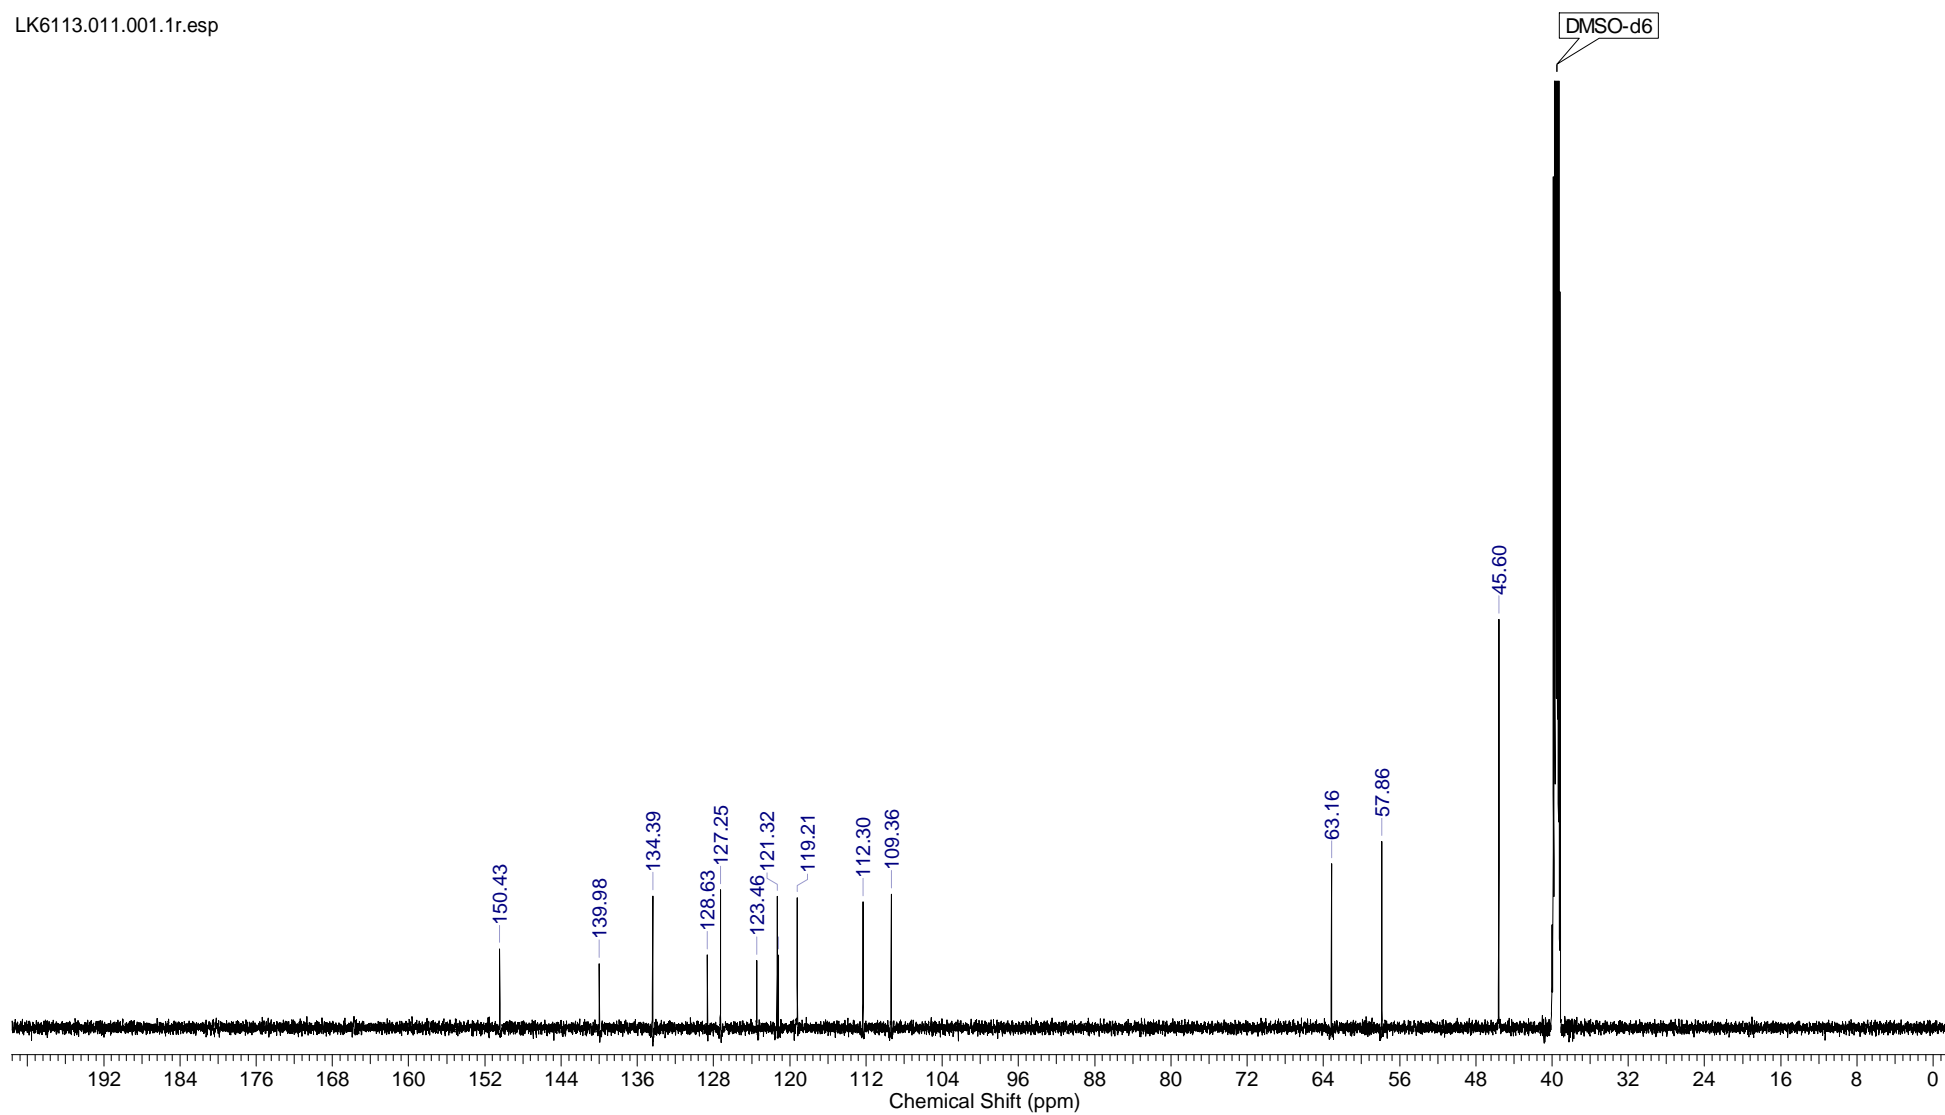

<sup>1</sup>H NMR (700 MHz, DMSO-d<sub>6</sub>)

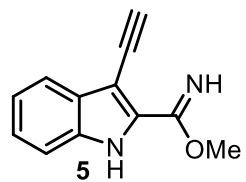

LK6114.010.001.1r.esp

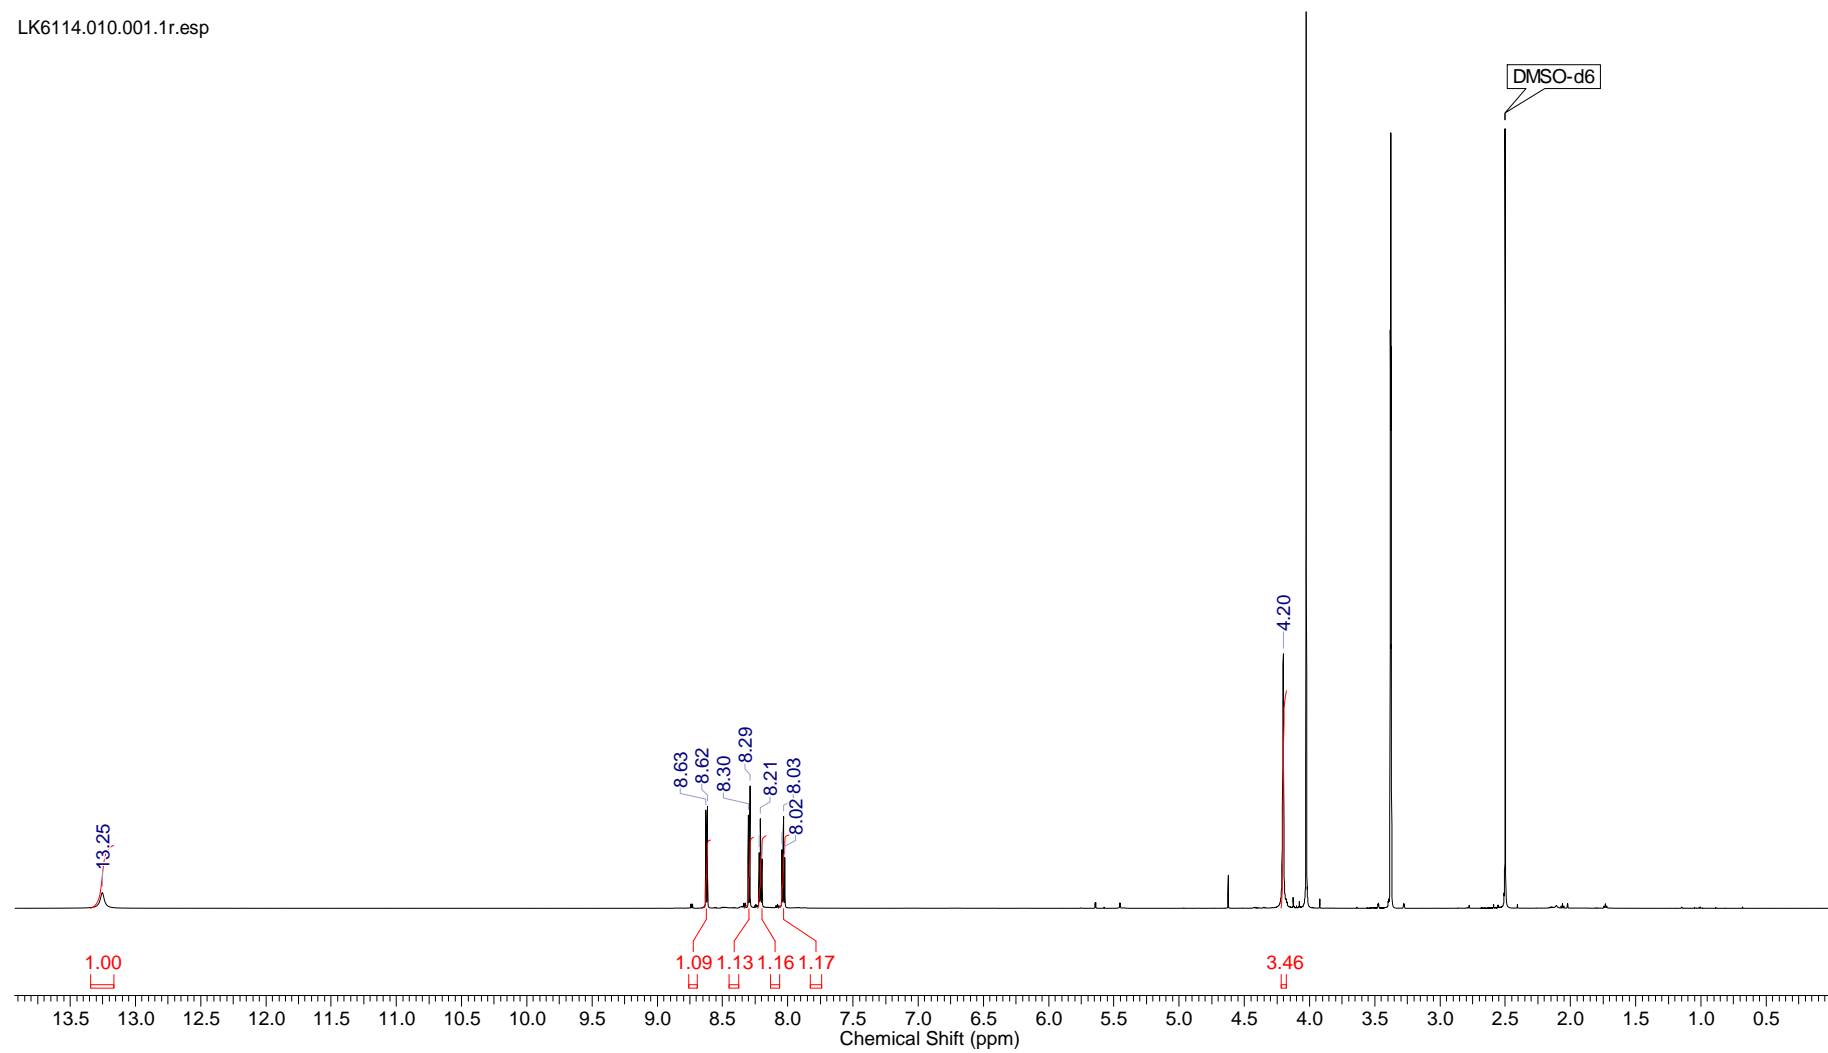

$^{13}\text{C}$  {1H} NMR (177 MHz, DMSO- $d_6$ )

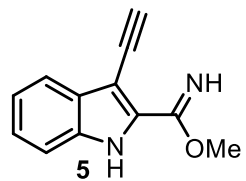

LK6114.011.001.1r.esp

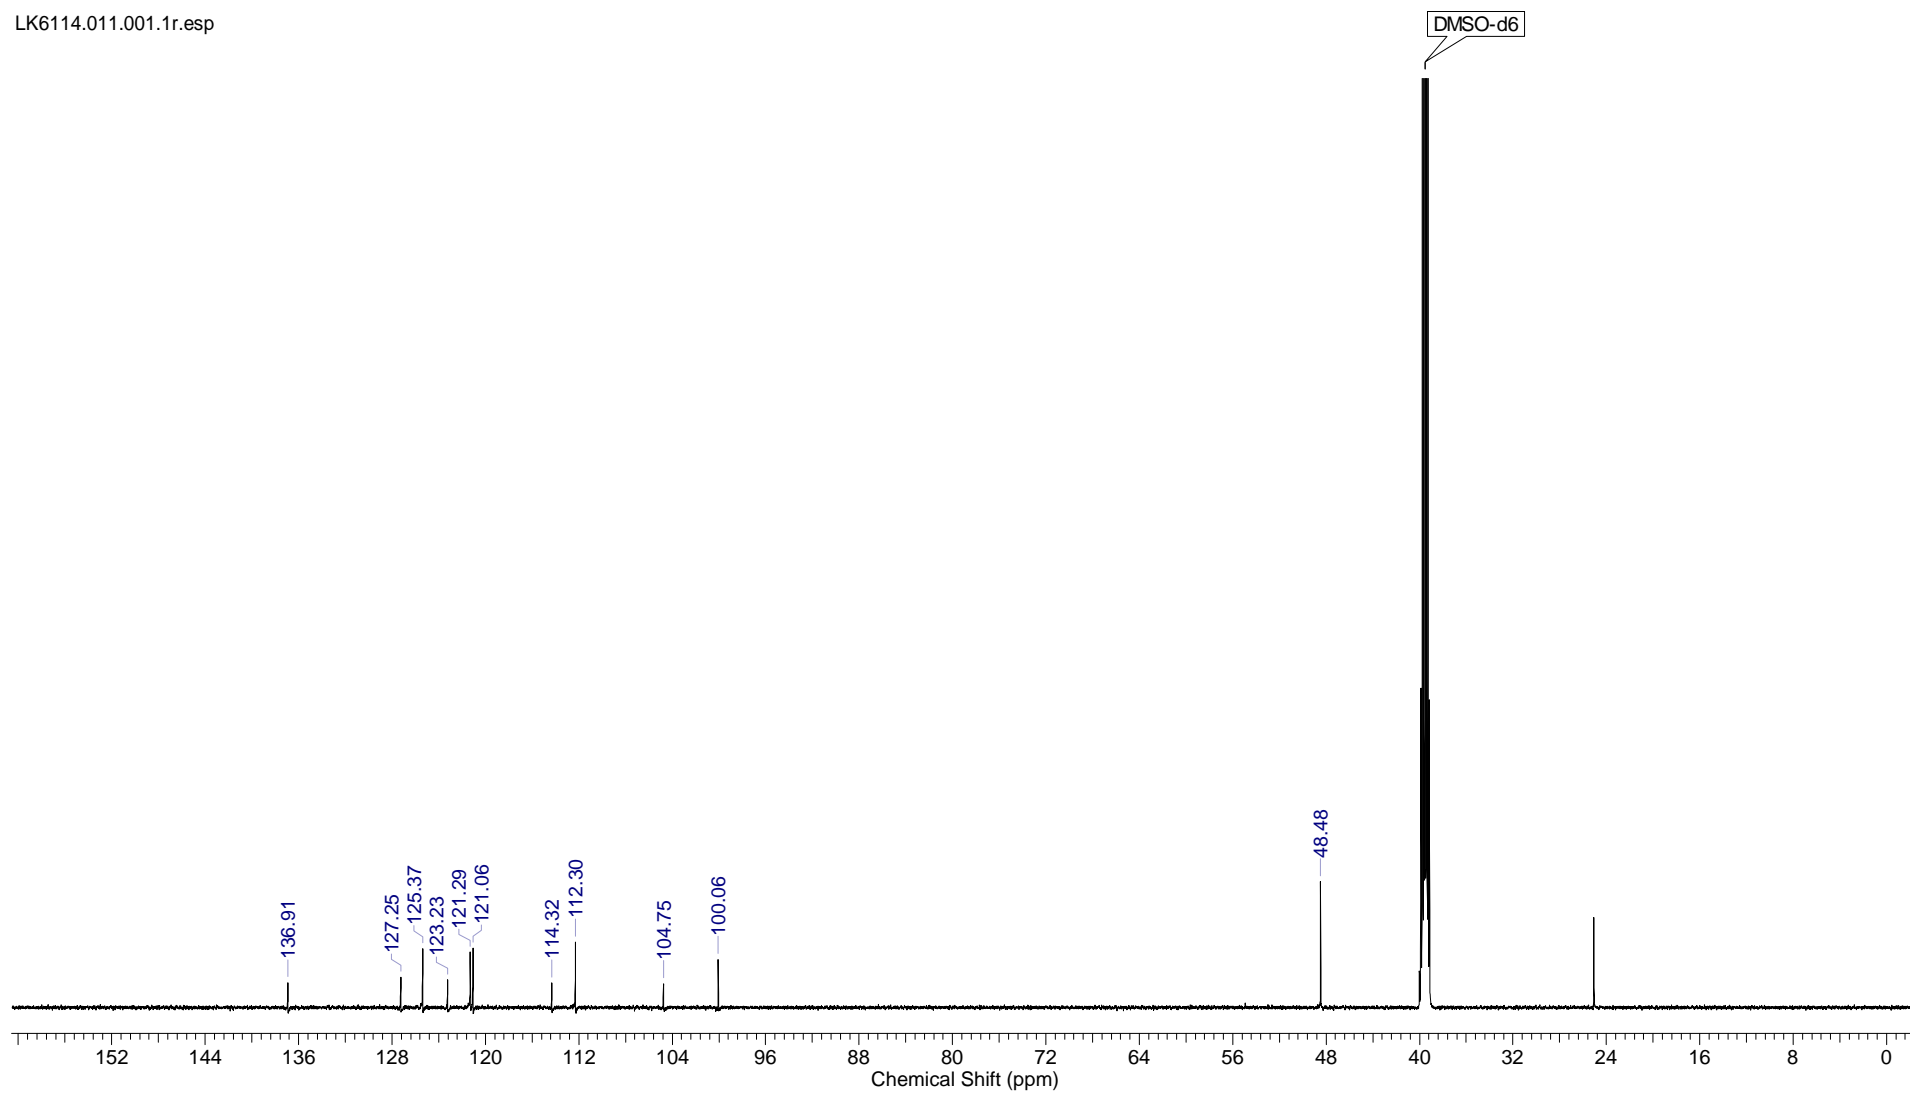

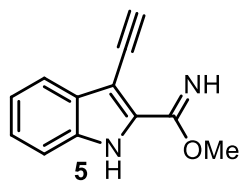

GC-MS data

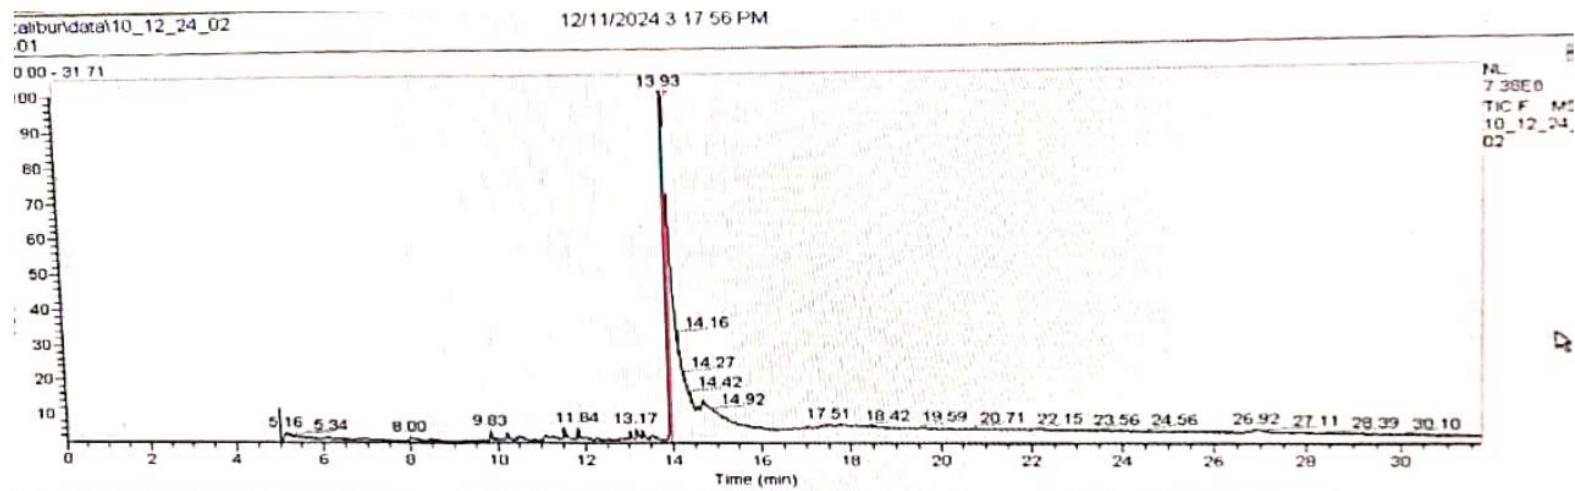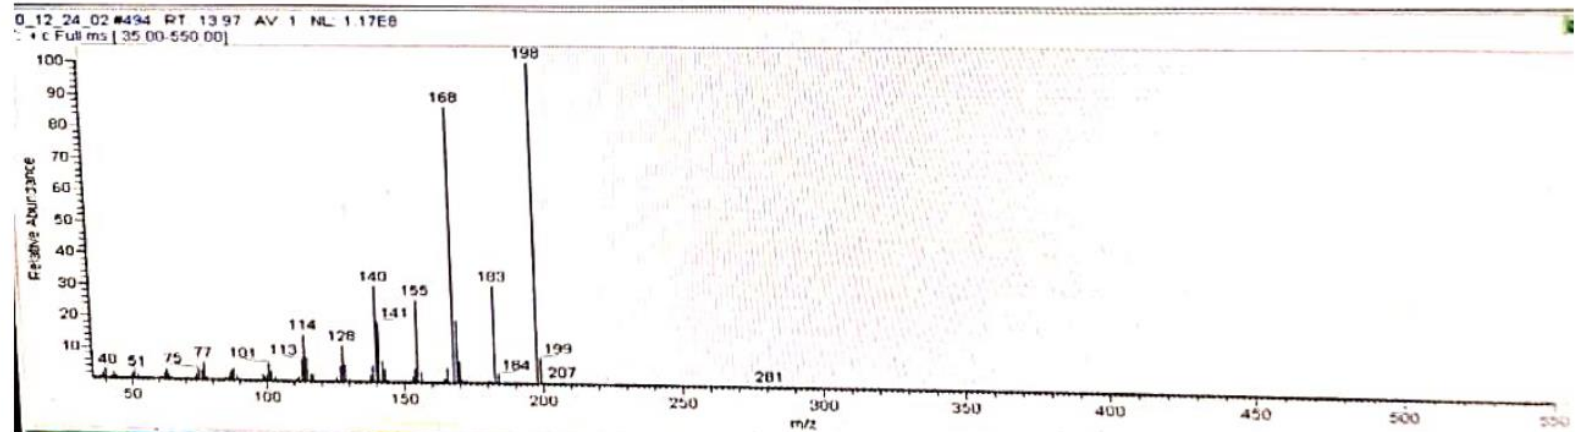



## 2. X-Ray crystallographic data for compound **4h**

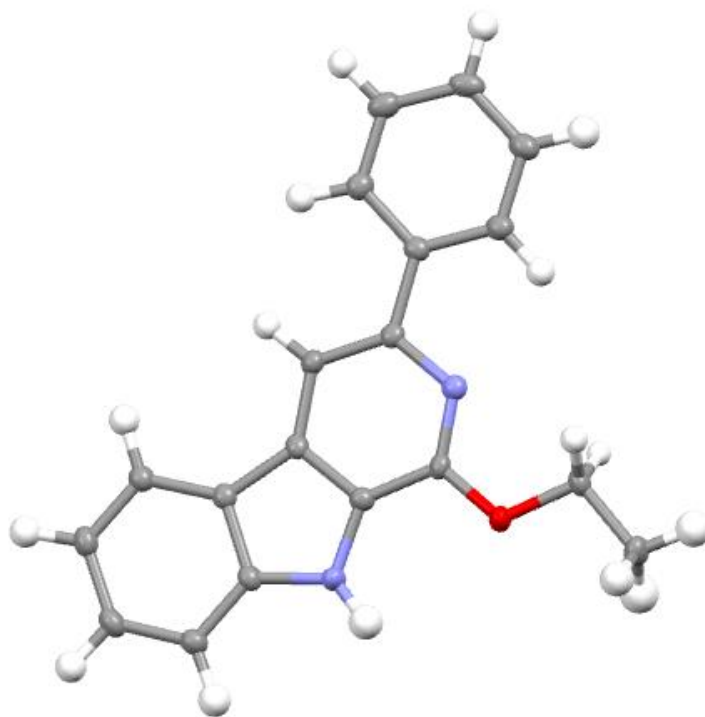

**Figure S1.** A thermal ellipsoid plot for the crystal structure **4h**. The ellipsoid contour is shown with 50% probability level.

The crystal of **4h** for X-Ray diffraction study has been obtained through the heating of compound in EtOH-EtOAc until complete dissolution, followed by slow cooling to room temperature. X-ray diffraction experiment was performed at the Center for Shared Use of Physical Methods of Investigation at the Frumkin Institute of Physical Chemistry and Electrochemistry, RAS. Colorless crystals of  $C_{19}H_{16}N_2O$  are monoclinic, space group  $P 2_1/c$ , **a** 15.7758 (14) **b** 5.9637 (6) **c** 15.5467 (14) Å, **a** 90 **b** 92.558(4) **g** 90,  $V = 1461.21 \text{ \AA}^3$ . The R-Factor is 4.76. Atomic coordinates, bond lengths and angles and thermal parameters have been deposited at the Cambridge Crystallographic Data Center (CCDC), reference number 2402787.
